# Supplementary material for: Polyphenol extracts from rambutan peel promote longevity via the attenuation of the Toll/Imd pathway
Source: Royal Society of Chemistry journal article supplement (doi:10.1039/d4fo06353h), 2025-01-01
Supplement: d4fo06353h1.xlsx [file d4fo06353h1.xlsx]

## Sheet: CK-D10-vs-CK-D50
id	CK-D10-1_count	CK-D10-2_count	CK-D10-3_count	CK-D50-1_count	CK-D50-2_count	CK-D50-3_count	CK-D10-1_tpm	CK-D10-2_tpm	CK-D10-3_tpm	CK-D50-1_tpm	CK-D50-2_tpm	CK-D50-3_tpm	CK-D10_mean	CK-D50_mean	log2(fc)	PValue	FDR	Symbol	Description	KEGG_A_class	KEGG_B_class	Pathway	K_ID	GO Component	GO Function	GO Process	TF_family
FBgn0027584	947	965	1044	9124	8294	7330	30.99	31.731	36.444	273.296	251.596	244.647	33.055	256.513	2.95609	2.52122e-141	3.28742e-137	CG4757	NP_001262469.1 uncharacterized protein Dmel_CG4757, isoform B [Drosophila melanogaster]	Metabolism	Lipid metabolism	ko00564//Glycerophospholipid metabolism	K01049	GO:0005615//extracellular space	GO:0052689//carboxylic ester hydrolase activity	-	--
FBgn0035343	354	343	282	2325	2497	2854	22.978	22.378	19.881	138.195	149.737	188.803	21.7457	158.912	2.86943	2.40887e-94	1.57047e-90	CG16762	NP_647722.1 uncharacterized protein Dmel_CG16762 [Drosophila melanogaster]	-	-	-	-	-	-	-	--
FBgn0002868	6151	5046	6314	28131	27794	25036	1066.96	881.403	1189.11	4467.4	4448.94	4422.53	1045.82	4446.29	2.08796	8.36266e-77	3.63469e-73	MtnA	Metallothionein A	-	-	-	-	-	GO:0046872//metal ion binding	GO:0010038//response to metal ion;GO:0055065//metal ion homeostasis	--
FBgn0038294	5581	9874	10150	818	806	690	383.007	689.086	761.92	40.203	39.999	38.639	611.338	39.6137	-3.9479	1.18541e-76	3.86415e-73	Mf	Myofilin	-	-	-	-	GO:0005863//striated muscle myosin thick filament;GO:0031672//A band	-	-	--
FBgn0014865	169	114	91	1534	1694	1321	36.225	24.56	21.186	301.095	335.454	288.58	27.3237	308.376	3.49647	1.3434e-72	3.50332e-69	Mtk	Metchnikowin	-	-	-	-	GO:0005576//extracellular region	-	GO:0006952//defense response;GO:0009611//response to wounding;GO:0009617//response to bacterium;GO:0019731//antibacterial humoral response;GO:0019732//antifungal humoral response;GO:0031640//killing of cells of other organism;GO:0045087//innate immune response;GO:0050829//defense response to Gram-negative bacterium;GO:0050830//defense response to Gram-positive bacterium;GO:0050832//defense respon…	--
FBgn0034468	181	195	185	1379	1533	1150	19.008	20.583	21.102	132.614	148.734	123.086	20.231	134.811	2.7363	4.43731e-70	9.64302e-67	Obp56a	Odorant-binding protein 56a	-	-	-	-	GO:0005576//extracellular region	GO:0005549//odorant binding	GO:0007606//sensory perception of chemical stimulus;GO:0007608//sensory perception of smell;GO:0019236//response to pheromone;GO:0042048//olfactory behavior	--
FBgn0036362	368	366	513	3113	2779	2412	24.132	24.124	36.539	186.934	168.36	161.202	28.265	172.165	2.60671	1.74122e-64	3.2434e-61	CG10725	NP_648647.1 uncharacterized protein Dmel_CG10725 [Drosophila melanogaster]	-	-	-	-	GO:0005576//extracellular region	GO:0008061//chitin binding	-	--
FBgn0040074	1259	1622	1040	138	116	152	90.631	117.358	81.315	9.097	7.715	11.152	96.4347	9.32133	-3.37094	4.32611e-64	7.05101e-61	retinin	retinin	-	-	-	-	GO:0005615//extracellular space	GO:0005212//structural constituent of eye lens	-	--
FBgn0051901	204	217	254	2158	1694	1375	6.22	6.65	8.412	60.254	47.718	42.729	7.094	50.2337	2.82398	5.66917e-60	8.21336e-57	Mur29B	Mucin related 29B	-	-	-	-	GO:0031012//extracellular matrix	GO:0005201//extracellular matrix structural constituent	-	--
FBgn0035176	124	189	192	1220	1192	1348	7.802	11.952	13.121	70.291	69.288	86.44	10.9583	75.3397	2.78138	1.84557e-59	2.40644e-56	CG13905	NP_612072.2 uncharacterized protein Dmel_CG13905 [Drosophila melanogaster]	-	-	-	-	-	-	-	--
FBgn0038450	2631	2680	2336	8626	9195	8344	88.281	90.385	85.135	265.044	285.038	285.344	87.9337	278.475	1.66306	3.37113e-59	3.99601e-56	CG17560	AEU04558.1 FI16819p1, partial [Drosophila melanogaster]	Cellular Processes	Transport and catabolism	ko04146//Peroxisome	K13356	GO:0005777//peroxisome;GO:0016021//integral component of membrane;GO:0043231//intracellular membrane-bounded organelle	GO:0080019//fatty-acyl-CoA reductase (alcohol-forming) activity;GO:0102965//alcohol-forming fatty acyl-CoA reductase activity	GO:0006629//lipid metabolic process;GO:0035336//long-chain fatty-acyl-CoA metabolic process	--
FBgn0283437	1987	1992	2134	546	454	483	48.821	49.194	56.949	12.285	10.305	12.095	51.6547	11.5617	-2.15955	1.29371e-55	1.40572e-52	PPO1	Prophenoloxidase 1	Metabolism;Metabolism	Global and overview maps;Amino acid metabolism	ko01100//Metabolic pathways;ko00350//Tyrosine metabolism	K00505;K00505	GO:0005576//extracellular region	GO:0004097//catechol oxidase activity;GO:0004503//tyrosinase activity;GO:0016491//oxidoreductase activity	GO:0009611//response to wounding;GO:0035006//melanization defense response;GO:0035314//scab formation;GO:0042060//wound healing;GO:0042381//hemolymph coagulation;GO:0042417//dopamine metabolic process;GO:0050830//defense response to Gram-positive bacterium;GO:0050832//defense response to fungus	--
FBgn0052368	169	87	104	1146	1103	1004	23.679	12.252	15.827	147.033	142.773	143.367	17.2527	144.391	3.06509	1.43603e-51	1.44034e-48	CG32368	NP_729310.1 uncharacterized protein Dmel_CG32368 [Drosophila melanogaster]	-	-	-	-	-	-	-	--
FBgn0035985	1240	1327	1189	4472	4225	3886	70.526	75.86	73.451	232.913	222.003	225.258	73.279	226.725	1.62947	1.82317e-51	1.69802e-48	Cpr67B	Cuticular protein 67B	-	-	-	-	GO:0031012//extracellular matrix;GO:0062129//chitin-based extracellular matrix	GO:0008010//structural constituent of chitin-based larval cuticle	GO:0040003//chitin-based cuticle development	--
FBgn0004885	657	622	598	2896	2906	2237	7.033	6.692	6.953	28.389	28.74	24.407	6.89267	27.1787	1.97934	1.17431e-50	1.02079e-47	tok	tolkin	-	-	-	-	GO:0005615//extracellular space	GO:0004222//metalloendopeptidase activity;GO:0005509//calcium ion binding;GO:0008237//metallopeptidase activity;GO:0008270//zinc ion binding	GO:0006508//proteolysis;GO:0007411//axon guidance;GO:0007415//defasciculation of motor neuron axon;GO:0008045//motor neuron axon guidance;GO:0008586//imaginal disc-derived wing vein morphogenesis;GO:0016485//protein processing;GO:0030513//positive regulation of BMP signaling pathway;GO:0032927//positive regulation of activin receptor signaling pathway	--
FBgn0039474	475	413	383	1646	1962	1852	25.195	22.018	22.065	79.949	96.145	100.118	23.0927	92.0707	1.99531	1.43342e-49	1.16815e-46	CG6283	NP_651524.1 uncharacterized protein Dmel_CG6283 [Drosophila melanogaster]	-	-	-	-	GO:0005615//extracellular space	GO:0004806//triglyceride lipase activity;GO:0008970//phospholipase A1 activity;GO:0016298//lipase activity	GO:0006629//lipid metabolic process;GO:0016042//lipid catabolic process	--
FBgn0033367	2350	2388	2184	700	609	655	59.209	60.473	59.766	16.15	14.175	16.819	59.816	15.7147	-1.92842	2.72149e-49	2.08738e-46	PPO2	Prophenoloxidase 2	-	-	-	-	GO:0005576//extracellular region;GO:0005615//extracellular space	GO:0004503//tyrosinase activity;GO:0016491//oxidoreductase activity;GO:0046872//metal ion binding	GO:0035006//melanization defense response;GO:0035011//melanotic encapsulation of foreign target;GO:0042417//dopamine metabolic process;GO:0042438//melanin biosynthetic process;GO:0050830//defense response to Gram-positive bacterium;GO:0050832//defense response to fungus	--
FBgn0033830	163	73	76	1487	1099	1172	6.422	2.891	3.252	53.65	40.003	47.062	4.18833	46.905	3.48529	7.72929e-48	5.59901e-45	CG10814	NP_610868.1 uncharacterized protein Dmel_CG10814 [Drosophila melanogaster]	Metabolism;Metabolism	Global and overview maps;Amino acid metabolism	ko01100//Metabolic pathways;ko00310//Lysine degradation	K00471;K00471	GO:0005739//mitochondrion	GO:0008336//gamma-butyrobetaine dioxygenase activity;GO:0016491//oxidoreductase activity;GO:0046872//metal ion binding	GO:0045329//carnitine biosynthetic process	--
FBgn0010388	89	48	42	1015	656	734	14.402	7.807	7.382	150.401	98.019	121.05	9.86367	123.157	3.64223	1.47372e-47	1.01136e-44	Dro	Drosocin	-	-	-	-	GO:0005576//extracellular region	-	GO:0002213//defense response to insect;GO:0006952//defense response;GO:0006964//positive regulation of biosynthetic process of antibacterial peptides active against Gram-negative bacteria;GO:0009617//response to bacterium;GO:0019731//antibacterial humoral response;GO:0042742//defense response to bacterium;GO:0045087//innate immune response;GO:0050829//defense response to Gram-negative bacterium;G…	--
FBgn0038160	337	451	267	2071	3040	2201	38.821	51.969	33.039	214.604	321.884	258.273	41.2763	264.92	2.68217	5.24368e-47	3.41861e-44	CG9759	ADD31619.1 RH68384p, partial [Drosophila melanogaster]	-	-	-	-	-	-	-	--
FBgn0028950	5802	5822	5964	15824	15072	14873	337.176	340.033	375.748	842.103	808.99	880.895	350.986	843.996	1.26582	9.52483e-47	5.91401e-44	CG15255	NP_001285958.1 uncharacterized protein Dmel_CG15255, isoform B [Drosophila melanogaster]	-	-	-	-	-	GO:0004222//metalloendopeptidase activity;GO:0008237//metallopeptidase activity;GO:0008270//zinc ion binding	GO:0006508//proteolysis	--
FBgn0034512	11524	11515	16576	67239	57993	53285	817.52	820.528	1278.03	4369.03	3801.73	3852.53	972.026	4007.76	2.04373	1.3626e-46	8.07587e-44	CG18067	NP_001286633.1 uncharacterized protein Dmel_CG18067, isoform B [Drosophila melanogaster]	-	-	-	-	GO:0005615//extracellular space	-	GO:0032504//multicellular organism reproduction	--
FBgn0029766	1518	1247	1307	5408	4986	4335	44.018	36.697	41.456	144.597	134.37	129.304	40.7237	136.09	1.74063	7.0338e-46	3.98755e-43	CG15784	NP_001284891.1 uncharacterized protein Dmel_CG15784, isoform B [Drosophila melanogaster]	-	-	-	-	-	-	-	--
FBgn0033593	110	132	97	750	802	638	14.042	16.937	13.449	87.672	94.584	83.005	14.8093	88.4203	2.57787	1.53255e-45	8.3262e-43	Listericin	Listericin	-	-	-	-	GO:0005615//extracellular space	-	GO:0050829//defense response to Gram-negative bacterium;GO:0050830//defense response to Gram-positive bacterium;GO:0051607//defense response to virus	--
FBgn0037562	212	243	249	1168	1069	976	17.883	20.603	22.813	90.221	83.308	83.907	20.433	85.812	2.07028	2.48406e-45	1.29559e-42	Nazo	NP_649778.1 nazo [Drosophila melanogaster]	-	-	-	-	GO:0005739//mitochondrion;GO:0005783//endoplasmic reticulum;GO:0005829//cytosol;GO:0016021//integral component of membrane	-	GO:0050905//neuromuscular process;GO:0051607//defense response to virus	--
FBgn0040736	2144	1411	1805	13518	9999	8138	406.676	268.892	372.581	2353.67	1753.94	1576.23	349.383	1894.61	2.43902	3.62862e-45	1.81975e-42	BomS3	Bomanin Short 3	Organismal Systems	Immune system	ko04624//Toll and Imd signaling pathway	K20695	GO:0005576//extracellular region	-	GO:0006952//defense response;GO:0009617//response to bacterium;GO:0019731//antibacterial humoral response;GO:0045087//innate immune response	--
FBgn0011722	852	867	768	3170	3050	2541	7.064	7.217	6.881	24.037	23.287	21.47	7.054	22.9313	1.70081	2.07757e-43	1.00331e-40	Tig	Tiggrin	-	-	-	-	GO:0005604//basement membrane;GO:0031012//extracellular matrix	GO:0005178//integrin binding	GO:0007411//axon guidance;GO:0031589//cell-substrate adhesion;GO:0033627//cell adhesion mediated by integrin;GO:0033628//regulation of cell adhesion mediated by integrin;GO:0034446//substrate adhesion-dependent cell spreading;GO:0072499//photoreceptor cell axon guidance	--
MSTRG.2256	96	78	108	604	626	566	7.781	6.3	9.458	44.69	46.71	46.573	7.84633	45.991	2.55126	2.16572e-43	1.00853e-40	--	IP07237p, partial [Drosophila melanogaster]	-	-	-	-	-	-	-	--
FBgn0035358	213	224	257	971	938	986	13.1	13.847	17.168	54.687	53.298	61.806	14.705	56.597	1.94442	8.32944e-42	3.74509e-39	CG14949	NP_647734.1 uncharacterized protein Dmel_CG14949 [Drosophila melanogaster]	-	-	-	-	-	-	-	--
FBgn0002962	3406	2853	2859	930	980	858	84.944	71.435	77.512	21.243	22.583	21.853	77.9637	21.893	-1.83233	1.85963e-41	8.08257e-39	nos	nanos	-	-	-	-	GO:0005737//cytoplasm;GO:0031594//neuromuscular junction;GO:0045495//pole plasm;GO:0048471//perinuclear region of cytoplasm;GO:0071598//neuronal ribonucleoprotein granule;GO:0098975//postsynapse of neuromuscular junction;GO:1990124//messenger ribonucleoprotein complex	GO:0003723//RNA binding;GO:0003729//mRNA binding;GO:0008270//zinc ion binding	GO:0006378//mRNA polyadenylation;GO:0006417//regulation of translation;GO:0007280//pole cell migration;GO:0007281//germ cell development;GO:0007283//spermatogenesis;GO:0007314//oocyte anterior/posterior axis specification;GO:0008354//germ cell migration;GO:0008595//anterior/posterior axis specification, embryo;GO:0017148//negative regulation of translation;GO:0030718//germ-line stem cell populati…	--
FBgn0031176	11630	9680	10773	28952	33374	30069	1703.25	1423.75	1713.09	3883.14	4516.01	4488.24	1613.36	4295.8	1.41285	2.31743e-41	9.74741e-39	whe	what else	-	-	-	-	-	-	-	--
FBgn0283461	1677	1767	1941	5278	5590	4889	248.928	263.627	312.934	717.416	766.576	739.617	275.163	741.203	1.42958	3.29065e-41	1.34084e-38	Drs	Drosomycin	Organismal Systems	Immune system	ko04624//Toll and Imd signaling pathway	K20670	GO:0005576//extracellular region;GO:0005615//extracellular space	-	GO:0006952//defense response;GO:0009611//response to wounding;GO:0009617//response to bacterium;GO:0019731//antibacterial humoral response;GO:0019732//antifungal humoral response;GO:0031640//killing of cells of other organism;GO:0042832//defense response to protozoan;GO:0050829//defense response to Gram-negative bacterium;GO:0050832//defense response to fungus;GO:0061844//antimicrobial humoral im…	--
FBgn0086708	863	720	581	6170	4594	3231	18.381	15.173	12.93	124.724	93.83	72.389	15.4947	96.981	2.64593	6.49902e-41	2.5679e-38	stv	starvin	-	-	-	-	GO:0005829//cytosol;GO:0030018//Z disc	GO:0031072//heat shock protein binding;GO:0051087//chaperone binding	GO:1903061//positive regulation of protein lipidation	--
FBgn0038353	5054	5100	5450	17233	14557	13830	298.297	303.27	349.171	932.491	795.376	833.094	316.913	853.654	1.42957	2.26782e-40	8.6971e-38	CG5399	NP_001262611.1 uncharacterized protein Dmel_CG5399, isoform B [Drosophila melanogaster]	-	-	-	-	-	-	-	--
MSTRG.7018	587	756	766	2814	2843	2349	19.359	22.999	24.794	87.4	93.179	84.057	22.384	88.212	1.97851	3.21832e-40	1.19681e-37	env	SD01615p [Drosophila melanogaster]	-	-	-	-	-	-	-	--
FBgn0035089	98	101	109	638	640	515	10.197	10.444	12.269	61.171	61.533	54.878	10.97	59.194	2.43189	3.30432e-40	1.19681e-37	Phk-3	Pherokine 3	-	-	-	-	GO:0005576//extracellular region;GO:0005615//extracellular space	-	GO:0007552//metamorphosis;GO:0009617//response to bacterium	--
FBgn0038299	798	805	856	3701	3051	2581	32.034	32.48	37.323	136.048	113.151	105.596	33.9457	118.265	1.80072	9.16657e-40	3.23035e-37	Spn88Eb	Serpin 88Eb	-	-	-	-	GO:0005615//extracellular space	GO:0004867//serine-type endopeptidase inhibitor activity	GO:0009620//response to fungus;GO:0010951//negative regulation of endopeptidase activity;GO:0045861//negative regulation of proteolysis;GO:1990399//epithelium regeneration;GO:2000035//regulation of stem cell division	--
FBgn0264776	886	749	691	2731	2543	2476	60.161	51.118	50.962	169.81	159.526	171.348	54.0803	166.895	1.62576	2.73136e-39	9.37216e-37	CG44014	NP_732043.1 uncharacterized protein Dmel_CG44014 [Drosophila melanogaster]	-	-	-	-	-	-	-	--
FBgn0039629	846	823	817	2853	2481	2359	43.469	42.503	45.595	134.237	117.771	123.533	43.8557	125.18	1.51317	6.17426e-39	2.06426e-36	CG11842	NP_651662.1 uncharacterized protein Dmel_CG11842 [Drosophila melanogaster]	-	-	-	-	-	GO:0004252//serine-type endopeptidase activity	GO:0006508//proteolysis;GO:0034976//response to endoplasmic reticulum stress	--
FBgn0040606	1323	1153	1549	5127	4918	4105	214.319	187.464	271.184	760.931	736.356	678.156	224.322	725.148	1.6927	7.8133e-38	2.54694e-35	CG6503	NP_001189297.1 uncharacterized protein Dmel_CG6503, isoform B [Drosophila melanogaster]	-	-	-	-	-	-	-	--
FBgn0015714	692	735	911	2578	2575	2572	25.5	27.39	36.669	87.553	88.055	97.02	29.853	90.876	1.60602	9.81671e-38	3.12195e-35	Cyp6a17	Cytochrome P450-6a17	-	-	-	-	GO:0005789//endoplasmic reticulum membrane;GO:0016020//membrane	GO:0004497//monooxygenase activity;GO:0005506//iron ion binding;GO:0016705//oxidoreductase activity, acting on paired donors, with incorporation or reduction of molecular oxygen;GO:0020037//heme binding	GO:0040040//thermosensory behavior	--
FBgn0262146	132	146	108	624	726	894	22.003	24.443	19.553	95.376	111.857	151.816	21.9997	119.683	2.44366	3.04159e-37	9.4427e-35	MtnE	Metallothionein E	-	-	-	-	-	GO:0046872//metal ion binding	GO:0010043//response to zinc ion;GO:0010272//response to silver ion;GO:0046688//response to copper ion;GO:0046689//response to mercury ion;GO:0071585//detoxification of cadmium ion	--
FBgn0036106	5822	7908	6497	24033	22655	19492	275.394	376.052	333.415	1041.77	990.359	939.506	328.287	990.546	1.59327	1.21238e-36	3.67634e-34	CG6409	NP_001287023.1 uncharacterized protein Dmel_CG6409, isoform B [Drosophila melanogaster]	-	-	-	-	-	-	-	--
FBgn0004047	70583	69571	67799	28450	24045	21898	2724.61	2699.32	2842.52	1005.64	857.254	861.391	2755.49	908.095	-1.60139	1.51186e-36	4.48027e-34	Yp3	Yolk protein 3	-	-	-	-	GO:0005576//extracellular region;GO:0005615//extracellular space;GO:0043186//P granule	GO:0004806//triglyceride lipase activity;GO:0016298//lipase activity;GO:0080030//methyl indole-3-acetate esterase activity	GO:0007548//sex differentiation;GO:0009617//response to bacterium;GO:0009792//embryo development ending in birth or egg hatching;GO:0016042//lipid catabolic process;GO:0045995//regulation of embryonic development	--
FBgn0034741	60	59	38	394	402	429	5.885	5.645	3.98	35.938	37.333	43.67	5.17	38.9803	2.91451	1.80981e-36	5.24402e-34	CG4269	NP_001286730.1 uncharacterized protein Dmel_CG4269, isoform C [Drosophila melanogaster]	-	-	-	-	-	-	-	--
FBgn0032773	4206	4718	4190	13425	12078	10891	124.14	139.092	133.357	362.484	328.528	327.597	132.196	339.536	1.36088	3.92963e-36	1.11388e-33	fon	fondue	-	-	-	-	GO:0005576//extracellular region	-	GO:0007552//metamorphosis;GO:0042381//hemolymph coagulation	--
FBgn0034383	10	21	7	247	279	274	0.535	1.13	0.407	12.109	13.799	14.95	0.690667	13.6193	4.30152	1.23362e-35	3.42237e-33	CG17821	NP_725820.2 uncharacterized protein Dmel_CG17821 [Drosophila melanogaster]	Metabolism;Metabolism;Metabolism;Metabolism	Global and overview maps;Global and overview maps;Lipid metabolism;Lipid metabolism	ko01100//Metabolic pathways;ko01212//Fatty acid metabolism;ko01040//Biosynthesis of unsaturated fatty acids;ko00062//Fatty acid elongation	K10249;K10249;K10249;K10249	GO:0016021//integral component of membrane;GO:0030176//integral component of endoplasmic reticulum membrane	GO:0009922//fatty acid elongase activity;GO:0102336//3-oxo-arachidoyl-CoA synthase activity;GO:0102337//3-oxo-cerotoyl-CoA synthase activity;GO:0102338//3-oxo-lignoceronyl-CoA synthase activity;GO:0102756//very-long-chain 3-ketoacyl-CoA synthase activity	GO:0019367//fatty acid elongation, saturated fatty acid;GO:0030148//sphingolipid biosynthetic process;GO:0030497//fatty acid elongation;GO:0034625//fatty acid elongation, monounsaturated fatty acid;GO:0034626//fatty acid elongation, polyunsaturated fatty acid;GO:0042761//very long-chain fatty acid biosynthetic process	--
FBgn0031561	4513	3436	3832	12946	11625	10842	721.78	552.277	665.733	1896.36	1717.99	1767.48	646.597	1793.94	1.4722	7.39522e-35	2.00888e-32	IM33	Immune induced molecule 33	-	-	-	-	GO:0005615//extracellular space	GO:0004867//serine-type endopeptidase inhibitor activity	GO:0009617//response to bacterium	--
FBgn0011822	410	489	458	2058	1497	1607	17.979	21.553	21.814	82.639	60.646	71.82	20.4487	71.7017	1.81	1.03549e-34	2.75545e-32	Pgcl	Pepsinogen C-like	Cellular Processes	Transport and catabolism	ko04142//Lysosome	K01382	GO:0005764//lysosome;GO:0005768//endosome	GO:0004190//aspartic-type endopeptidase activity;GO:0016779//nucleotidyltransferase activity	GO:0001737//establishment of imaginal disc-derived wing hair orientation;GO:0006508//proteolysis;GO:0008219//cell death;GO:0016540//protein autoprocessing	--
FBgn0034761	2770	2768	3011	7808	7084	6782	258.286	259.435	304.963	666.753	610.243	644.462	274.228	640.486	1.22379	1.71535e-34	4.47328e-32	CG4250	NP_001246468.1 uncharacterized protein Dmel_CG4250, isoform B [Drosophila melanogaster]	Cellular Processes	Transport and catabolism	ko04142//Lysosome	K19363	GO:0005765//lysosomal membrane;GO:0010008//endosome membrane	GO:0046872//metal ion binding	-	zf-LITAF-like
FBgn0039873	2399	2610	1901	7466	7219	6651	69.043	75.5	59.424	196.761	191.942	195.085	67.989	194.596	1.51711	2.60533e-34	6.66095e-32	Smvt	Sodium-dependent multivitamin transporter	-	-	-	-	GO:0016020//membrane;GO:0016021//integral component of membrane	GO:0015293//symporter activity;GO:0022857//transmembrane transporter activity	GO:0006814//sodium ion transport;GO:0055085//transmembrane transport	--
FBgn0067905	156	110	202	1242	1077	778	40.186	28.481	56.518	292.974	256.31	204.255	41.7283	251.18	2.58962	7.79376e-34	1.95429e-31	IM14	Immune induced molecule 14	-	-	-	-	GO:0005576//extracellular region	-	GO:0006952//defense response;GO:0009617//response to bacterium;GO:0045087//innate immune response	--
FBgn0262003	80	126	138	687	711	602	10.258	16.239	19.219	80.666	84.226	78.671	15.2387	81.1877	2.41352	1.36427e-33	3.35384e-31	CG42821	NP_001034060.2 uncharacterized protein Dmel_CG42821 [Drosophila melanogaster]	-	-	-	-	-	GO:0005515//protein binding	-	--
FBgn0029507	1174	1029	1095	3883	3494	2912	75.805	66.887	76.924	228.564	206.959	191.521	73.2053	209.015	1.51358	1.38897e-33	3.35384e-31	Tsp42Ed	Tetraspanin 42Ed	Cellular Processes	Transport and catabolism	ko04142//Lysosome	K06497	GO:0005887//integral component of plasma membrane;GO:0016021//integral component of membrane	-	-	--
FBgn0085256	82	58	52	477	557	389	9.712	6.905	6.69	51.736	60.949	46.958	7.769	53.2143	2.77601	2.19664e-33	5.20763e-31	CG34227	NP_001097269.1 uncharacterized protein Dmel_CG34227 [Drosophila melanogaster]	-	-	-	-	GO:0005615//extracellular space	-	-	--
FBgn0036024	23392	27708	23534	9955	10126	10275	1491.4	1775.6	1629.71	581.205	596.441	667.659	1632.24	615.102	-1.40795	3.46453e-33	8.06679e-31	CG18180	AEU04573.1 FI16825p1, partial [Drosophila melanogaster]	-	-	-	-	-	GO:0004252//serine-type endopeptidase activity	GO:0006508//proteolysis	--
FBgn0035806	633	602	483	1723	1942	1922	50.434	48.209	41.798	125.708	142.945	156.069	46.8137	141.574	1.59655	7.68829e-33	1.75873e-30	PGRP-SD	Peptidoglycan recognition protein SD	Organismal Systems	Immune system	ko04624//Toll and Imd signaling pathway	K24097	GO:0005576//extracellular region;GO:0005615//extracellular space	GO:0008270//zinc ion binding;GO:0008745//N-acetylmuramoyl-L-alanine amidase activity;GO:0042834//peptidoglycan binding	GO:0009253//peptidoglycan catabolic process;GO:0032499//detection of peptidoglycan;GO:0045087//innate immune response;GO:0050829//defense response to Gram-negative bacterium;GO:0050830//defense response to Gram-positive bacterium;GO:0061059//positive regulation of peptidoglycan recognition protein signaling pathway	--
FBgn0067903	58	58	29	418	401	389	11.68	11.681	6.288	76.892	74.41	79.631	9.883	76.9777	2.96142	9.06514e-33	2.03794e-30	IM18	Immune induced molecule 18	-	-	-	-	GO:0005576//extracellular region	-	GO:0006952//defense response;GO:0009617//response to bacterium;GO:0045087//innate immune response;GO:0098542//defense response to other organism	--
FBgn0262563	298	269	316	1130	1135	926	35.516	32.223	40.905	123.323	124.969	112.477	36.2147	120.256	1.73147	1.53821e-32	3.39944e-30	CG43103	NP_001246385.1 uncharacterized protein Dmel_CG43103 [Drosophila melanogaster]	-	-	-	-	-	-	-	--
FBgn0035695	346	304	367	1368	1253	1059	4.328	4.107	4.963	15.576	14.393	13.42	4.466	14.463	1.69531	1.61795e-32	3.51608e-30	CG10226	NP_648040.1 uncharacterized protein Dmel_CG10226, isoform A [Drosophila melanogaster]	Environmental Information Processing	Membrane transport	ko02010//ABC transporters	K05658	GO:0005886//plasma membrane;GO:0016021//integral component of membrane;GO:0043190//ATP-binding cassette (ABC) transporter complex	GO:0005524//ATP binding;GO:0008559//ABC-type xenobiotic transporter activity;GO:0015562//efflux transmembrane transporter activity;GO:0016887//ATP hydrolysis activity;GO:0042626//ATPase-coupled transmembrane transporter activity;GO:0140359//ABC-type transporter activity	GO:0009636//response to toxic substance;GO:0042908//xenobiotic transport;GO:0055085//transmembrane transport;GO:0097254//renal tubular secretion	--
FBgn0063497	1542	1263	1287	4013	3594	3709	117.325	96.587	106.358	279.599	252.63	287.613	106.757	273.281	1.35606	2.88778e-32	6.17276e-30	GstE3	Glutathione S transferase E3	Metabolism;Metabolism;Metabolism;Metabolism;Metabolism	Global and overview maps;Xenobiotics biodegradation and metabolism;Metabolism of other amino acids;Xenobiotics biodegradation and metabolism;Xenobiotics biodegradation and metabolism	ko01100//Metabolic pathways;ko00983//Drug metabolism - other enzymes;ko00480//Glutathione metabolism;ko00980//Metabolism of xenobiotics by cytochrome P450;ko00982//Drug metabolism - cytochrome P450	K00799;K00799;K00799;K00799;K00799	GO:0005737//cytoplasm	GO:0004364//glutathione transferase activity	GO:0006749//glutathione metabolic process	--
FBgn0020416	915	1285	1565	5769	5134	4498	36.375	51.345	67.575	210.013	188.557	182.242	51.765	193.604	1.90306	5.51539e-32	1.15992e-29	Idgf1	Imaginal disc growth factor 1	-	-	-	-	GO:0005576//extracellular region	GO:0008061//chitin binding;GO:0008084//imaginal disc growth factor receptor binding	GO:0005975//carbohydrate metabolic process;GO:0006032//chitin catabolic process;GO:0007444//imaginal disc development;GO:0018990//ecdysis, chitin-based cuticle;GO:0040003//chitin-based cuticle development;GO:0042060//wound healing;GO:1990399//epithelium regeneration;GO:2000035//regulation of stem cell division	--
FBgn0032002	291	284	289	979	945	882	18.576	18.191	19.99	63.76	61.536	63.746	18.919	63.014	1.73584	8.28428e-32	1.71458e-29	CG8353	NP_001260233.1 uncharacterized protein Dmel_CG8353, isoform B [Drosophila melanogaster]	Metabolism;Metabolism;Metabolism	Global and overview maps;Xenobiotics biodegradation and metabolism;Nucleotide metabolism	ko01100//Metabolic pathways;ko00983//Drug metabolism - other enzymes;ko00240//Pyrimidine metabolism	K01489;K01489;K01489	GO:0005829//cytosol	GO:0003824//catalytic activity;GO:0004126//cytidine deaminase activity;GO:0008270//zinc ion binding;GO:0016787//hydrolase activity	GO:0009972//cytidine deamination	--
FBgn0051343	11894	12207	10720	30623	29364	25907	227.447	234.625	222.656	536.242	518.764	504.911	228.243	519.972	1.18787	1.00013e-31	2.0376e-29	CG31343	NP_732652.1 uncharacterized protein Dmel_CG31343 [Drosophila melanogaster]	Metabolism;Metabolism	Global and overview maps;Metabolism of other amino acids	ko01100//Metabolic pathways;ko00480//Glutathione metabolism	K11140;K11140	GO:0005737//cytoplasm	GO:0008237//metallopeptidase activity;GO:0008270//zinc ion binding;GO:0042277//peptide binding;GO:0070006//metalloaminopeptidase activity	GO:0006508//proteolysis;GO:0043171//peptide catabolic process	--
FBgn0040735	648	456	723	2771	2613	2092	97.191	68.743	117.782	380.584	362.072	319.787	94.572	354.148	1.90487	1.42624e-31	2.86104e-29	BomT2	Bomanin Tailed 2	-	-	-	-	GO:0005576//extracellular region	-	GO:0006952//defense response;GO:0045087//innate immune response	--
FBgn0028424	748	757	793	2328	2127	1936	28.742	29.236	33.096	81.913	75.506	75.816	30.358	77.745	1.35667	1.68171e-31	3.32239e-29	JhI-26	Juvenile hormone-inducible protein 26	-	-	-	-	-	-	GO:0045924//regulation of female receptivity	--
FBgn0029769	1307	1570	1627	4862	4380	3917	38.671	46.791	52.486	131.898	120.152	118.401	45.9827	123.484	1.42516	1.8046e-31	3.51197e-29	frma	fra mauro	-	-	-	-	-	GO:0004222//metalloendopeptidase activity;GO:0008237//metallopeptidase activity;GO:0046872//metal ion binding	GO:0006508//proteolysis;GO:0045434//negative regulation of female receptivity, post-mating	--
FBgn0036945	2661	2525	2380	6046	5716	5907	179.477	170.824	174.455	373.65	356.256	406.292	174.919	378.733	1.1145	2.73138e-31	5.23743e-29	Ssk	Snakeskin	-	-	-	-	GO:0005887//integral component of plasma membrane;GO:0005920//smooth septate junction;GO:0016021//integral component of membrane;GO:0016327//apicolateral plasma membrane	-	GO:0007496//anterior midgut development;GO:0019991//septate junction assembly;GO:0060576//intestinal epithelial cell development	--
FBgn0040582	512	375	679	3031	2363	2143	81.257	59.393	113.986	445.713	349.301	349.065	84.8787	381.36	2.16768	2.88994e-31	5.46116e-29	BomBc3	Bomanin Bicipital 3	-	-	-	-	GO:0005615//extracellular space	-	-	--
FBgn0033301	334	262	349	1213	1155	1009	44.413	35.017	50.406	147.703	141.89	136.743	43.2787	142.112	1.7153	4.22785e-30	7.87528e-28	CG12780	NP_610388.1 uncharacterized protein Dmel_CG12780 [Drosophila melanogaster]	-	-	-	-	GO:0009986//cell surface	GO:0030246//carbohydrate binding	GO:0009595//detection of biotic stimulus;GO:0051607//defense response to virus	--
FBgn0020414	5305	5337	4636	12499	12075	11355	182.469	184.297	172.916	392.99	382.383	397.526	179.894	390.966	1.1199	4.58941e-30	8.42835e-28	Idgf3	Imaginal disc growth factor 3	Metabolism;Metabolism	Global and overview maps;Carbohydrate metabolism	ko01100//Metabolic pathways;ko00520//Amino sugar and nucleotide sugar metabolism	K01183;K01183	GO:0005576//extracellular region	GO:0004568//chitinase activity;GO:0008061//chitin binding	GO:0005975//carbohydrate metabolic process	--
FBgn0051410	413	197	385	1800	1613	2188	35.892	17.208	36.341	143.246	129.505	193.796	29.8137	155.516	2.38301	6.34772e-30	1.14955e-27	Npc2e	Niemann-Pick type C-2e	Cellular Processes	Transport and catabolism	ko04142//Lysosome	K13443	GO:0005615//extracellular space	GO:0001530//lipopolysaccharide binding;GO:0030882//lipid antigen binding;GO:0032934//sterol binding;GO:0042834//peptidoglycan binding;GO:0070891//lipoteichoic acid binding	GO:0015918//sterol transport	--
FBgn0035434	432	622	520	2025	2020	1602	68.176	98.663	89.133	292.642	294.513	257.667	85.324	281.607	1.72266	8.09045e-30	1.44509e-27	Drsl5	Drosomycin-like 5	Organismal Systems	Immune system	ko04624//Toll and Imd signaling pathway	K20670	GO:0005576//extracellular region	-	GO:0006952//defense response;GO:0050832//defense response to fungus	--
FBgn0030041	9439	11927	11428	31309	28234	26165	345.365	438.628	454.16	1049.02	954.392	975.706	412.718	993.038	1.26669	3.42492e-29	6.03481e-27	CG12116	NP_572481.1 uncharacterized protein Dmel_CG12116 [Drosophila melanogaster]	Metabolism;Metabolism	Global and overview maps;Metabolism of cofactors and vitamins	ko01100//Metabolic pathways;ko00790//Folate biosynthesis	K00072;K00072	-	GO:0004757//sepiapterin reductase activity	GO:0006729//tetrahydrobiopterin biosynthetic process	--
FBgn0010385	145	102	108	568	572	510	20.876	14.76	16.888	74.884	76.081	74.833	17.508	75.266	2.10398	3.75767e-29	6.53283e-27	Def	Defensin	Organismal Systems	Immune system	ko04624//Toll and Imd signaling pathway	K20668	GO:0005576//extracellular region;GO:0005615//extracellular space	-	GO:0006952//defense response;GO:0006959//humoral immune response;GO:0009617//response to bacterium;GO:0019731//antibacterial humoral response;GO:0042742//defense response to bacterium;GO:0045087//innate immune response;GO:0050830//defense response to Gram-positive bacterium	--
FBgn0032136	1082	1214	1393	6418	5540	3521	4.663	5.258	6.52	25.327	22.056	15.464	5.48033	20.949	1.93455	5.61011e-29	9.62502e-27	Apoltp	Apolipoprotein lipid transfer particle	-	-	-	-	GO:0005615//extracellular space;GO:0005886//plasma membrane;GO:0045178//basal part of cell	GO:0005319//lipid transporter activity;GO:0045735//nutrient reservoir activity;GO:0070325//lipoprotein particle receptor binding	GO:0006869//lipid transport;GO:0015918//sterol transport;GO:0032370//positive regulation of lipid transport;GO:0034196//acylglycerol transport	--
FBgn0041182	1029	1250	1567	5947	4850	3940	13.035	15.9	21.575	68.97	56.681	50.841	16.8367	58.8307	1.80496	5.71118e-29	9.67118e-27	Tep2	Thioester-containing protein 2	-	-	-	-	GO:0005576//extracellular region;GO:0005615//extracellular space	GO:0004866//endopeptidase inhibitor activity	GO:0045087//innate immune response;GO:0050829//defense response to Gram-negative bacterium	--
FBgn0040723	480	324	311	1590	1621	1293	62.024	41.845	43.59	187.23	193.616	170.09	49.153	183.645	1.90157	7.13819e-29	1.19327e-26	CG5011	-	-	-	-	-	-	-	-	--
FBgn0034291	176	221	173	1093	722	794	11.11	14.022	11.862	63.182	42.107	51.083	12.3313	52.124	2.07962	8.89502e-29	1.46813e-26	CG5770	NP_611282.1 uncharacterized protein Dmel_CG5770 [Drosophila melanogaster]	-	-	-	-	-	-	-	--
FBgn0030262	672	656	629	2008	1923	1598	56.437	55.375	57.376	154.379	149.105	136.619	56.396	146.701	1.37921	2.63316e-28	4.29171e-26	Vago	Vago	-	-	-	-	GO:0005615//extracellular space	-	GO:0051607//defense response to virus	--
FBgn0033821	286	300	439	1423	1344	1198	27.752	29.259	46.268	126.443	120.485	118.477	34.4263	121.802	1.82295	2.82447e-28	4.54669e-26	CG10799	NP_610859.1 uncharacterized protein Dmel_CG10799 [Drosophila melanogaster]	-	-	-	-	-	-	-	--
FBgn0041579	1214	1051	543	4506	4805	4488	77.487	67.426	37.644	263.367	283.338	291.95	60.8523	279.552	2.19973	3.12905e-28	4.97557e-26	AttC	Attacin-C	-	-	-	-	GO:0005576//extracellular region	-	GO:0042742//defense response to bacterium	--
FBgn0026314	736	761	920	2520	2309	2091	25.287	26.279	34.331	79.282	73.29	73.218	28.6323	75.2633	1.3943	4.32196e-28	6.78964e-26	Ugt35B1	UDP-glycosyltransferase family 35 member B1	Metabolism;Metabolism;Metabolism;Metabolism;Metabolism;Metabolism;Metabolism;Metabolism	Global and overview maps;Xenobiotics biodegradation and metabolism;Xenobiotics biodegradation and metabolism;Xenobiotics biodegradation and metabolism;Carbohydrate metabolism;Metabolism of cofactors and vitamins;Metabolism of cofactors and vitamins;Carbohydrate metabolism	ko01100//Metabolic pathways;ko00983//Drug metabolism - other enzymes;ko00980//Metabolism of xenobiotics by cytochrome P450;ko00982//Drug metabolism - cytochrome P450;ko00040//Pentose and glucuronate interconversions;ko00860//Porphyrin metabolism;ko00830//Retinol metabolism;ko00053//Ascorbate and aldarate metabolism	K00699;K00699;K00699;K00699;K00699;K00699;K00699;K00699	GO:0016021//integral component of membrane;GO:0043231//intracellular membrane-bounded organelle	GO:0008194//UDP-glycosyltransferase activity;GO:0015020//glucuronosyltransferase activity	GO:0006011//UDP-glucose metabolic process	--
FBgn0037996	44	48	47	302	373	271	1.358	1.489	1.576	8.536	10.637	8.526	1.47433	9.233	2.64674	5.13299e-28	7.96774e-26	CG4830	NP_650160.1 uncharacterized protein Dmel_CG4830 [Drosophila melanogaster]	-	-	-	-	-	GO:0004467//long-chain fatty acid-CoA ligase activity;GO:0015645//fatty acid ligase activity;GO:0016405//CoA-ligase activity	GO:0001676//long-chain fatty acid metabolic process;GO:0006633//fatty acid biosynthetic process;GO:0046949//fatty-acyl-CoA biosynthetic process	--
FBgn0038818	478	412	311	1375	1504	1347	7.871	6.74	5.661	21.158	23.148	22.959	6.75733	22.4217	1.73037	6.62121e-28	1.01569e-25	Nep4	Neprilysin 4	-	-	-	-	GO:0005615//extracellular space;GO:0005886//plasma membrane;GO:0016021//integral component of membrane;GO:0016529//sarcoplasmic reticulum	GO:0004175//endopeptidase activity;GO:0004222//metalloendopeptidase activity;GO:0008237//metallopeptidase activity;GO:0046872//metal ion binding	GO:0006508//proteolysis	--
FBgn0040551	526	470	498	1288	1427	1348	69.885	62.548	72.36	156.531	175.309	182.796	68.2643	171.545	1.32939	8.37728e-28	1.27013e-25	CG11686	NP_001262531.1 uncharacterized protein Dmel_CG11686, isoform B [Drosophila melanogaster]	-	-	-	-	GO:0016021//integral component of membrane	-	-	--
FBgn0034470	2253	2524	2729	6808	7432	5787	218.891	246.493	287.903	605.244	666.849	572.598	251.096	614.897	1.29211	9.09346e-28	1.36287e-25	Obp56d	Odorant-binding protein 56d	-	-	-	-	GO:0005576//extracellular region	GO:0005549//odorant binding	GO:0007606//sensory perception of chemical stimulus;GO:0007608//sensory perception of smell;GO:0019236//response to pheromone;GO:0042048//olfactory behavior	--
FBgn0038466	1569	1722	1351	3979	3769	3969	38.113	42.038	35.647	88.519	84.58	98.27	38.5993	90.4563	1.22865	2.57191e-27	3.77573e-25	CG8907	NP_001247146.1 uncharacterized protein Dmel_CG8907, isoform B [Drosophila melanogaster]	-	-	-	-	GO:0005886//plasma membrane;GO:0045202//synapse	GO:0003779//actin binding;GO:0005515//protein binding	GO:0007266//Rho protein signal transduction;GO:0035023//regulation of Rho protein signal transduction;GO:0042048//olfactory behavior	--
FBgn0033820	11423	14407	18619	49891	48131	43685	822.864	1043.85	1452.84	3290.57	3197.12	3196.42	1106.52	3228.04	1.54463	2.57719e-27	3.77573e-25	CG4716	NP_001286384.1 uncharacterized protein Dmel_CG4716, isoform C [Drosophila melanogaster]	-	-	-	-	-	GO:0004486//methylenetetrahydrofolate dehydrogenase [NAD(P)+] activity;GO:0004487//methylenetetrahydrofolate dehydrogenase (NAD+) activity	-	--
FBgn0038252	4862	4540	4588	1697	2113	1911	218.372	204.951	223.816	69.795	87.676	87.476	215.713	81.649	-1.40161	2.81005e-27	4.07113e-25	BigH1	Histone H1 variant BigH1	-	-	-	-	GO:0000785//chromatin;GO:0000786//nucleosome;GO:0005634//nucleus;GO:0042025//host cell nucleus	GO:0003677//DNA binding;GO:0003690//double-stranded DNA binding;GO:0031492//nucleosomal DNA binding	GO:0006334//nucleosome assembly;GO:0006355//regulation of transcription, DNA-templated;GO:0016584//nucleosome positioning;GO:0030261//chromosome condensation;GO:0045910//negative regulation of DNA recombination;GO:0060303//regulation of nucleosome density	--
FBgn0035904	1723	1684	1748	3943	3884	3631	112.347	110.365	123.795	235.431	233.969	241.295	115.502	236.898	1.03635	3.47117e-27	4.97369e-25	GstO3	Glutathione S transferase O3	Metabolism;Metabolism;Metabolism	Global and overview maps;Metabolism of other amino acids;Metabolism of cofactors and vitamins	ko01100//Metabolic pathways;ko00480//Glutathione metabolism;ko00790//Folate biosynthesis	K00310;K00310;K00310	GO:0005737//cytoplasm	GO:0004364//glutathione transferase activity;GO:0016782//transferase activity, transferring sulphur-containing groups;GO:0045174//glutathione dehydrogenase (ascorbate) activity	GO:0006749//glutathione metabolic process	--
FBgn0262574	253	234	228	834	952	716	52.303	48.6	51.177	157.912	181.849	150.885	50.6933	163.549	1.68985	5.70192e-27	8.08124e-25	CG43114	NP_001246264.1 uncharacterized protein Dmel_CG43114, isoform A [Drosophila melanogaster]	-	-	-	-	-	-	-	--
FBgn0028371	2176	2043	1830	5733	5329	4559	17.585	16.014	16.719	39.284	38.307	34.296	16.7727	37.2957	1.1529	5.77573e-27	8.09782e-25	jbug	jitterbug	Human Diseases;Environmental Information Processing;Cellular Processes;Human Diseases	Infectious disease: bacterial;Signal transduction;Cellular community - eukaryotes;Cancer: overview	ko05132//Salmonella infection;ko04010//MAPK signaling pathway;ko04510//Focal adhesion;ko05205//Proteoglycans in cancer	K04437;K04437;K04437;K04437	-	GO:0003779//actin binding;GO:0005515//protein binding;GO:0051015//actin filament binding	GO:0009612//response to mechanical stimulus;GO:0030036//actin cytoskeleton organization;GO:0048104//establishment of body hair or bristle planar orientation;GO:0072499//photoreceptor cell axon guidance	--
FBgn0085205	274	243	232	950	831	758	39.252	34.989	36.098	124.621	109.979	110.668	36.7797	115.089	1.64577	6.06795e-27	8.41702e-25	CG34176	-	-	-	-	-	-	-	-	--
FBgn0085359	1656	1762	2157	4942	4715	4650	153.88	164.203	217.771	420.357	404.592	439.905	178.618	421.618	1.23906	6.95281e-27	9.54291e-25	CG34330	NP_001097029.1 uncharacterized protein Dmel_CG34330, isoform A [Drosophila melanogaster]	-	-	-	-	-	-	-	--
FBgn0033194	253	299	311	1616	1456	889	1.402	1.667	1.872	8.202	7.458	5.02	1.647	6.89333	2.06536	8.46993e-27	1.14769e-24	Vps13	Vacuolar protein sorting 13	-	-	-	-	GO:0019898//extrinsic component of membrane;GO:0031902//late endosome membrane	-	GO:0006623//protein targeting to vacuole;GO:0019538//protein metabolic process;GO:0045053//protein retention in Golgi apparatus	--
FBgn0031277	43	28	41	277	325	249	5.114	3.347	5.296	30.168	35.71	30.182	4.58567	32.02	2.80377	8.5379e-27	1.14769e-24	CG13947	-	-	-	-	-	-	-	-	--
FBgn0030159	147	162	140	582	626	513	11.966	13.256	12.434	43.71	47.164	42.342	12.552	44.4053	1.82282	1.00821e-26	1.34144e-24	CG9689	NP_001285066.1 uncharacterized protein Dmel_CG9689, isoform B [Drosophila melanogaster]	-	-	-	-	-	-	-	--
FBgn0040734	84	66	133	572	604	480	22.135	17.48	38.066	138.023	147.04	128.909	25.8937	137.991	2.4139	3.7675e-26	4.96206e-24	BomS5	Bomanin Short 5	Organismal Systems	Immune system	ko04624//Toll and Imd signaling pathway	K20695	GO:0005615//extracellular space	-	GO:0006952//defense response;GO:0045087//innate immune response	--
FBgn0034717	1370	1661	1445	3778	3705	3404	25.497	31.416	29.657	66.205	64.687	65.796	28.8567	65.5627	1.18397	3.97238e-26	5.17959e-24	CG5819	NP_001246458.1 uncharacterized protein Dmel_CG5819, isoform C [Drosophila melanogaster]	-	-	-	-	GO:0016021//integral component of membrane	GO:0005515//protein binding	-	--
FBgn0025583	182	101	245	1283	1122	852	28.488	15.89	41.652	183.896	162.249	135.916	28.6767	160.687	2.4863	4.64886e-26	6.00163e-24	BomS2	Bomanin Short 2	Organismal Systems	Immune system	ko04624//Toll and Imd signaling pathway	K20695	GO:0005576//extracellular region	-	GO:0006952//defense response;GO:0009617//response to bacterium;GO:0045087//innate immune response	--
FBgn0262717	152	193	176	652	666	576	4.086	5.889	5.305	18.017	19.814	18.65	5.09333	18.827	1.88612	4.954e-26	6.33286e-24	Skeletor	Skeletor	-	-	-	-	GO:0005634//nucleus;GO:0005700//polytene chromosome;GO:0005730//nucleolus;GO:0005737//cytoplasm;GO:0005819//spindle;GO:0005874//microtubule	GO:0004500//dopamine beta-monooxygenase activity;GO:0005198//structural molecule activity	GO:0006584//catecholamine metabolic process;GO:0006997//nucleus organization;GO:0051225//spindle assembly;GO:0051301//cell division;GO:0051321//meiotic cell cycle	--
FBgn0034296	1109	833	951	4127	3218	2624	70.007	52.853	65.205	238.564	187.672	168.819	62.6883	198.352	1.66179	5.24332e-26	6.63764e-24	CG10912	NP_611287.1 uncharacterized protein Dmel_CG10912 [Drosophila melanogaster]	-	-	-	-	-	-	GO:0009631//cold acclimation	--
FBgn0085452	263	183	263	1001	881	799	32.417	22.857	35.397	114.328	101.562	101.745	30.2237	105.878	1.80866	6.41236e-26	8.03949e-24	CG34423	NP_001163263.1 uncharacterized protein Dmel_CG34423, isoform B [Drosophila melanogaster]	-	-	-	-	GO:0005739//mitochondrion	GO:0042030//ATPase inhibitor activity;GO:0051117//ATPase binding	GO:0006783//heme biosynthetic process;GO:0032780//negative regulation of ATPase activity	--
FBgn0051777	250	236	296	868	1050	801	37.497	35.578	48.22	119.216	145.494	122.442	40.4317	129.051	1.67438	6.79944e-26	8.44361e-24	CG31777	NP_722933.1 uncharacterized protein Dmel_CG31777 [Drosophila melanogaster]	-	-	-	-	-	GO:0004867//serine-type endopeptidase inhibitor activity	-	--
FBgn0004167	802	707	733	3578	2961	1970	3.497	3.108	3.478	14.316	11.939	8.745	3.361	11.6667	1.79543	9.99556e-26	1.22955e-23	kst	karst	-	-	-	-	GO:0005737//cytoplasm;GO:0005874//microtubule;GO:0005886//plasma membrane;GO:0016324//apical plasma membrane;GO:0016327//apicolateral plasma membrane	GO:0003779//actin binding;GO:0005085//guanyl-nucleotide exchange factor activity;GO:0005515//protein binding;GO:0005543//phospholipid binding;GO:0008017//microtubule binding	GO:0006897//endocytosis;GO:0007009//plasma membrane organization;GO:0032509//endosome transport via multivesicular body sorting pathway;GO:0042060//wound healing;GO:0045186//zonula adherens assembly;GO:0051693//actin filament capping	--
FBgn0265413	995	874	855	2221	2250	2126	75.793	66.869	70.758	154.684	158.256	164.208	71.14	159.049	1.16074	1.12307e-25	1.36857e-23	CG44325	NP_001285034.1 uncharacterized protein Dmel_CG44325, isoform D [Drosophila melanogaster]	-	-	-	-	GO:0005887//integral component of plasma membrane	-	GO:0019991//septate junction assembly	--
FBgn0051148	1215	1250	1317	2924	2717	3098	39.277	40.615	46.242	86.557	81.144	102.069	42.0447	89.9233	1.09677	1.44409e-25	1.74347e-23	Gba1a	Glucocerebrosidase 1a	Metabolism;Cellular Processes;Metabolism;Metabolism	Global and overview maps;Transport and catabolism;Lipid metabolism;Glycan biosynthesis and metabolism	ko01100//Metabolic pathways;ko04142//Lysosome;ko00600//Sphingolipid metabolism;ko00511//Other glycan degradation	K01201;K01201;K01201;K01201	-	GO:0004348//glucosylceramidase activity;GO:0016787//hydrolase activity;GO:0046527//glucosyltransferase activity	GO:0006665//sphingolipid metabolic process;GO:0006680//glucosylceramide catabolic process;GO:0007613//memory;GO:0008340//determination of adult lifespan;GO:0008344//adult locomotory behavior;GO:0034620//cellular response to unfolded protein;GO:0070050//neuron cellular homeostasis	--
FBgn0035743	89	66	56	447	357	367	12.559	9.433	8.605	57.793	46.733	52.848	10.199	52.458	2.36274	1.70388e-25	2.03825e-23	Acbp6	Acyl-CoA binding protein 6	-	-	-	-	-	GO:0000062//fatty-acyl-CoA binding	-	--
FBgn0033970	318	410	340	1146	1097	1001	20.553	26.718	23.925	68.491	66.027	66.368	23.732	66.962	1.49651	1.83821e-25	2.17895e-23	CG10205	NP_725422.1 uncharacterized protein Dmel_CG10205, isoform A [Drosophila melanogaster]	-	-	-	-	-	-	-	--
FBgn0032055	4149	4278	3188	1378	1532	1276	138.591	143.61	115.601	42.14	47.219	43.339	132.601	44.2327	-1.5839	1.99558e-25	2.34418e-23	Sgp	Sgroppino	Cellular Processes	Transport and catabolism	ko04146//Peroxisome	K13356	GO:0005777//peroxisome;GO:0016021//integral component of membrane;GO:0043231//intracellular membrane-bounded organelle	GO:0080019//fatty-acyl-CoA reductase (alcohol-forming) activity;GO:0102965//alcohol-forming fatty acyl-CoA reductase activity	GO:0006629//lipid metabolic process;GO:0035336//long-chain fatty-acyl-CoA metabolic process	--
FBgn0039091	769	518	486	2034	1887	2301	19.971	13.521	13.708	48.37	45.273	60.902	15.7333	51.515	1.71117	2.40229e-25	2.79674e-23	CG10182	NP_651158.1 uncharacterized protein Dmel_CG10182 [Drosophila melanogaster]	-	-	-	-	GO:0016021//integral component of membrane	GO:0016747//acyltransferase activity, transferring groups other than amino-acyl groups	-	--
FBgn0263080	50	19	22	349	345	252	9.54	3.681	4.606	61.606	61.233	49.429	5.94233	57.4227	3.27252	3.14456e-25	3.62849e-23	CG43348	-	-	-	-	-	-	-	-	--
FBgn0032286	716	840	665	1985	2080	1823	14.453	16.981	14.463	36.359	38.519	37.347	15.299	37.4083	1.28992	4.03035e-25	4.60981e-23	CG7300	NP_001188789.2 uncharacterized protein Dmel_CG7300, isoform D [Drosophila melanogaster]	-	-	-	-	-	-	-	--
FBgn0015221	6273	6413	7191	17814	15677	13991	329.848	339.211	410.709	857.899	761.978	750.198	359.923	790.025	1.13421	4.10655e-25	4.65611e-23	Fer2LCH	Ferritin 2 light chain homologue	-	-	-	-	GO:0005576//extracellular region;GO:0005737//cytoplasm;GO:0005794//Golgi apparatus;GO:0008043//intracellular ferritin complex;GO:0012505//endomembrane system	GO:0004322//ferroxidase activity;GO:0005506//iron ion binding;GO:0008198//ferrous iron binding;GO:0008199//ferric iron binding	GO:0006826//iron ion transport;GO:0006879//cellular iron ion homeostasis;GO:0006880//intracellular sequestering of iron ion;GO:0009620//response to fungus;GO:0045475//locomotor rhythm;GO:0098711//iron ion import across plasma membrane;GO:1990461//detoxification of iron ion	--
FBgn0264775	239	237	217	813	712	683	17.22	17.102	17.494	53.435	46.963	49.088	17.272	49.8287	1.52854	5.39028e-25	6.05895e-23	CG44013	NP_001262606.1 uncharacterized protein Dmel_CG44013, isoform C [Drosophila melanogaster]	-	-	-	-	-	-	-	--
FBgn0028534	11496	14164	12273	5406	5815	5012	715.479	886.031	829.636	308.097	334.351	317.912	810.382	320.12	-1.33999	5.69914e-25	6.35138e-23	CG7916	NP_609682.1 uncharacterized protein Dmel_CG7916 [Drosophila melanogaster]	-	-	-	-	-	-	-	--
FBgn0002948	1583	1431	1404	518	617	537	39.236	35.354	37.738	11.71	14.067	13.59	37.4427	13.1223	-1.51266	8.61932e-25	9.52435e-23	nod	no distributive disjunction	-	-	-	-	GO:0005737//cytoplasm;GO:0005871//kinesin complex;GO:0005874//microtubule	GO:0003777//microtubule motor activity;GO:0005524//ATP binding;GO:0008017//microtubule binding;GO:0016887//ATP hydrolysis activity;GO:0051010//microtubule plus-end binding	GO:0007018//microtubule-based movement;GO:0007057//spindle assembly involved in female meiosis I;GO:0007143//female meiotic nuclear division;GO:0031116//positive regulation of microtubule polymerization;GO:0032837//distributive segregation;GO:0045132//meiotic chromosome segregation;GO:0051296//establishment of meiotic spindle orientation	--
FBgn0283480	800	752	707	2314	1871	1847	26.082	24.642	25.035	69.083	56.354	61.37	25.253	62.269	1.30206	9.62347e-25	1.05446e-22	Alp2	Alkaline phosphatase 2	Metabolism;Metabolism;Metabolism	Global and overview maps;Metabolism of cofactors and vitamins;Metabolism of cofactors and vitamins	ko01100//Metabolic pathways;ko00790//Folate biosynthesis;ko00730//Thiamine metabolism	K01077;K01077;K01077	GO:0009986//cell surface	GO:0004035//alkaline phosphatase activity;GO:0016791//phosphatase activity	GO:0016311//dephosphorylation	--
FBgn0032945	328	312	343	1176	1055	861	5.199	4.971	5.905	17.07	15.45	13.91	5.35833	15.4767	1.53024	1.63571e-24	1.77734e-22	CG8665	NP_610107.1 uncharacterized protein Dmel_CG8665 [Drosophila melanogaster]	Metabolism;Metabolism	Global and overview maps;Metabolism of cofactors and vitamins	ko01100//Metabolic pathways;ko00670//One carbon pool by folate	K00289;K00289	GO:0005737//cytoplasm	GO:0003824//catalytic activity;GO:0004029//aldehyde dehydrogenase (NAD+) activity;GO:0016155//formyltetrahydrofolate dehydrogenase activity;GO:0016491//oxidoreductase activity;GO:0016620//oxidoreductase activity, acting on the aldehyde or oxo group of donors, NAD or NADP as acceptor;GO:0016742//hydroxymethyl-, formyl- and related transferase activity	GO:0006730//one-carbon metabolic process;GO:0009058//biosynthetic process;GO:0009258//10-formyltetrahydrofolate catabolic process	--
FBgn0038842	440	499	510	1674	1411	1228	17.428	19.996	21.98	61.986	52.66	49.895	19.8013	54.847	1.46982	1.98599e-24	2.14011e-22	hdly	hadley	-	-	-	-	-	-	GO:0045434//negative regulation of female receptivity, post-mating	--
FBgn0039310	1048	1218	1333	3001	2991	2799	44.76	52.286	61.837	117.37	118.018	121.837	52.961	119.075	1.16887	2.73067e-24	2.91846e-22	CG11878	NP_651369.1 uncharacterized protein Dmel_CG11878 [Drosophila melanogaster]	-	-	-	-	-	-	-	--
FBgn0085419	121	108	74	474	485	435	1.433	1.328	0.967	5.225	5.333	5.385	1.24267	5.31433	2.09645	3.11757e-24	3.30488e-22	Rgk2	Rad, Gem/Kir family member 2	-	-	-	-	GO:0005886//plasma membrane;GO:0009898//cytoplasmic side of plasma membrane	GO:0003924//GTPase activity;GO:0005246//calcium channel regulator activity;GO:0005525//GTP binding	GO:0007264//small GTPase mediated signal transduction;GO:1901386//negative regulation of voltage-gated calcium channel activity	--
FBgn0262508	1465	1378	1297	3587	3722	2942	13.257	12.124	11.764	28.505	30.489	26.845	12.3817	28.613	1.20847	4.47923e-24	4.71005e-22	CG43078	NP_001246678.1 uncharacterized protein Dmel_CG43078, isoform H [Drosophila melanogaster]	-	-	-	-	GO:0016021//integral component of membrane	-	-	--
FBgn0038973	1523	1708	1348	3660	3494	3676	135.431	152.658	130.196	298.031	287.041	333.151	139.428	306.074	1.13436	5.15704e-24	5.37941e-22	Pebp1	Phosphatidylethanolamine-binding protein 1	-	-	-	-	-	-	GO:0002759//regulation of antimicrobial humoral response;GO:0050829//defense response to Gram-negative bacterium;GO:0050830//defense response to Gram-positive bacterium	--
FBgn0032618	1184	1225	1241	2962	2967	2526	42.223	44.032	48.446	97.575	98.689	92.799	44.9003	96.3543	1.10162	5.63579e-24	5.83214e-22	CG31743	NP_001286000.1 uncharacterized protein Dmel_CG31743, isoform B [Drosophila melanogaster]	Metabolism	Glycan biosynthesis and metabolism	ko00532//Glycosaminoglycan biosynthesis - chondroitin sulfate / dermatan sulfate	K01017	GO:0000139//Golgi membrane;GO:0016021//integral component of membrane	GO:0008146//sulfotransferase activity	GO:0016051//carbohydrate biosynthetic process	--
FBgn0030309	1553	1468	1580	3493	3366	3148	91.334	86.75	100.864	188.025	182.682	188.744	92.9827	186.484	1.00402	5.96296e-24	6.12213e-22	CG1572	NP_001285126.1 uncharacterized protein Dmel_CG1572, isoform C [Drosophila melanogaster]	-	-	-	-	GO:0016020//membrane;GO:0016021//integral component of membrane	-	GO:0035208//positive regulation of hemocyte proliferation	--
FBgn0003137	3442	3119	3522	11009	9393	7336	20.792	19.194	23.239	61.231	53.081	45.36	21.075	53.224	1.33654	7.31455e-24	7.45112e-22	Ppn	Papilin	-	-	-	-	GO:0005576//extracellular region;GO:0005604//basement membrane;GO:0031012//extracellular matrix	GO:0004222//metalloendopeptidase activity;GO:0004867//serine-type endopeptidase inhibitor activity;GO:0005201//extracellular matrix structural constituent;GO:0030414//peptidase inhibitor activity	GO:0007275//multicellular organism development;GO:0030198//extracellular matrix organization	--
FBgn0030158	1080	989	890	2312	2678	2329	93.154	85.741	83.379	182.611	213.398	204.736	87.4247	200.248	1.19568	8.36521e-24	8.45535e-22	CG9686	NP_572586.2 uncharacterized protein Dmel_CG9686 [Drosophila melanogaster]	-	-	-	-	-	-	-	--
FBgn0032105	1370	1247	1166	375	472	478	60.677	55.513	56.086	15.199	19.31	21.587	57.4253	18.6987	-1.61875	9.80964e-24	9.83907e-22	borr	borealin-related	-	-	-	-	GO:0000775//chromosome, centromeric region;GO:0000776//kinetochore;GO:0000785//chromatin;GO:0005634//nucleus;GO:0005938//cell cortex;GO:0032133//chromosome passenger complex;GO:0051233//spindle midzone;GO:1990385//meiotic spindle midzone	GO:0003677//DNA binding	GO:0000070//mitotic sister chromatid segregation;GO:0000281//mitotic cytokinesis;GO:0008104//protein localization;GO:0016572//histone phosphorylation;GO:0045448//mitotic cell cycle, embryonic	--
FBgn0033788	3448	2516	2754	8741	7444	7043	379.394	278.738	329.393	880.279	755.744	789.712	329.175	808.578	1.29653	1.07856e-23	1.07354e-21	CG13323	NP_001286370.1 uncharacterized protein Dmel_CG13323, isoform B [Drosophila melanogaster]	-	-	-	-	-	-	-	--
FBgn0266084	1608	1567	1881	637	664	512	16.136	15.748	20.518	6.154	6.177	5.282	17.4673	5.871	-1.57298	1.23671e-23	1.22163e-21	Fhos	Formin homology 2 domain containing	-	-	-	-	GO:0005634//nucleus;GO:0005737//cytoplasm;GO:0005856//cytoskeleton;GO:0016021//integral component of membrane;GO:0048471//perinuclear region of cytoplasm	GO:0051015//actin filament binding	GO:0003012//muscle system process;GO:0007476//imaginal disc-derived wing morphogenesis;GO:0010623//programmed cell death involved in cell development;GO:0030335//positive regulation of cell migration;GO:0030866//cortical actin cytoskeleton organization;GO:0035070//salivary gland histolysis;GO:0044319//wound healing, spreading of cells;GO:0046716//muscle cell cellular homeostasis;GO:0051496//posit…	--
FBgn0002565	255	176	128	13	11	9	6.358	4.411	3.466	0.297	0.253	0.229	4.745	0.259667	-4.19168	1.50616e-23	1.47661e-21	Lsp2	Larval serum protein 2	-	-	-	-	GO:0005576//extracellular region;GO:0005616//larval serum protein complex	GO:0045735//nutrient reservoir activity	GO:0008045//motor neuron axon guidance;GO:0016201//synaptic target inhibition	--
FBgn0011704	8479	7696	7228	3231	3810	3415	305.76	278.942	283.101	106.692	126.93	125.508	289.268	119.71	-1.27286	1.74589e-23	1.69886e-21	RnrS	Ribonucleoside diphosphate reductase small subunit	Metabolism;Metabolism;Metabolism;Metabolism;Metabolism	Global and overview maps;Xenobiotics biodegradation and metabolism;Nucleotide metabolism;Metabolism of other amino acids;Nucleotide metabolism	ko01100//Metabolic pathways;ko00983//Drug metabolism - other enzymes;ko00230//Purine metabolism;ko00480//Glutathione metabolism;ko00240//Pyrimidine metabolism	K10808;K10808;K10808;K10808;K10808	GO:0005829//cytosol	GO:0004748//ribonucleoside-diphosphate reductase activity, thioredoxin disulfide as acceptor;GO:0016491//oxidoreductase activity;GO:0046872//metal ion binding	GO:0006260//DNA replication;GO:0006919//activation of cysteine-type endopeptidase activity involved in apoptotic process;GO:0009263//deoxyribonucleotide biosynthetic process	--
FBgn0014018	2090	1513	1196	5504	5691	4703	37.192	27.653	23.637	90.213	94.065	85.557	29.494	89.945	1.60862	2.30608e-23	2.22733e-21	Rel	Relish	Organismal Systems	Immune system	ko04624//Toll and Imd signaling pathway	K02580	GO:0005634//nucleus;GO:0005654//nucleoplasm;GO:0005737//cytoplasm;GO:0005829//cytosol;GO:0042025//host cell nucleus	GO:0000977//RNA polymerase II transcription regulatory region sequence-specific DNA binding;GO:0000981//DNA-binding transcription factor activity, RNA polymerase II-specific;GO:0001228//DNA-binding transcription activator activity, RNA polymerase II-specific;GO:0003677//DNA binding;GO:0003700//DNA-binding transcription factor activity;GO:0005515//protein binding;GO:0042802//identical protein bind…	GO:0002225//positive regulation of antimicrobial peptide production;GO:0002230//positive regulation of defense response to virus by host;GO:0006355//regulation of transcription, DNA-templated;GO:0006955//immune response;GO:0006963//positive regulation of antibacterial peptide biosynthetic process;GO:0006964//positive regulation of biosynthetic process of antibacterial peptides active against Gram…	RHD
FBgn0038638	386	373	383	1060	960	967	9.777	9.292	10.489	24.415	22.299	24.71	9.85267	23.808	1.27286	2.35352e-23	2.25644e-21	CG7702	NP_650740.1 uncharacterized protein Dmel_CG7702, isoform A [Drosophila melanogaster]	-	-	-	-	GO:0016021//integral component of membrane	GO:0005515//protein binding	-	--
FBgn0039801	793	893	922	2403	2109	1973	76.004	86.041	95.545	210.69	186.447	192.558	85.8633	196.565	1.19489	2.69701e-23	2.56689e-21	Npc2h	Niemann-Pick type C-2h	Cellular Processes	Transport and catabolism	ko04142//Lysosome	K13443	GO:0005576//extracellular region;GO:0005615//extracellular space	GO:0001530//lipopolysaccharide binding;GO:0030882//lipid antigen binding;GO:0032934//sterol binding;GO:0042834//peptidoglycan binding;GO:0070891//lipoteichoic acid binding	GO:0015918//sterol transport;GO:0032367//intracellular cholesterol transport	--
FBgn0015037	728	667	1044	3139	2723	2292	24.893	22.924	38.773	98.287	86.019	79.874	28.8633	88.06	1.60925	4.32209e-23	4.08375e-21	Cyp4p1	Cytochrome P450-4p1	-	-	-	-	GO:0005789//endoplasmic reticulum membrane	GO:0004497//monooxygenase activity;GO:0005506//iron ion binding;GO:0016705//oxidoreductase activity, acting on paired donors, with incorporation or reduction of molecular oxygen;GO:0020037//heme binding	-	--
FBgn0033733	3479	4528	4120	10855	9702	8915	109.089	142.707	140.317	311.686	281.054	284.901	130.704	292.547	1.16236	5.13255e-23	4.81463e-21	CG8834	ACO51537.1 MIP06114p, partial [Drosophila melanogaster]	-	-	-	-	-	GO:0004467//long-chain fatty acid-CoA ligase activity;GO:0015645//fatty acid ligase activity;GO:0016405//CoA-ligase activity;GO:0102391//decanoate-CoA ligase activity	GO:0001676//long-chain fatty acid metabolic process;GO:0006633//fatty acid biosynthetic process;GO:0046949//fatty-acyl-CoA biosynthetic process	--
FBgn0023479	1873	1892	1999	5566	5366	3987	23.199	23.591	26.78	61.641	60.441	49.506	24.5233	57.196	1.22176	5.99306e-23	5.54209e-21	teq	Tequila	Organismal Systems	Development and regeneration	ko04361//Axon regeneration	K23489	GO:0005576//extracellular region;GO:0016020//membrane	GO:0004252//serine-type endopeptidase activity;GO:0005044//scavenger receptor activity;GO:0005515//protein binding;GO:0008061//chitin binding	GO:0006508//proteolysis;GO:0007614//short-term memory;GO:0007616//long-term memory;GO:0032024//positive regulation of insulin secretion;GO:0042593//glucose homeostasis	--
FBgn0038455	505	405	379	1175	1256	1180	26.301	21.2	21.439	56.037	60.432	62.633	22.98	59.7007	1.37737	7.22305e-23	6.63249e-21	CG14907	-	-	-	-	-	-	-	-	--
FBgn0033215	382	332	266	991	1042	961	16.815	14.689	12.718	39.946	42.375	43.113	14.7407	41.8113	1.50409	7.34833e-23	6.70034e-21	Dgat2	Diacylglycerol O-acyltransferase 2	Metabolism;Metabolism	Global and overview maps;Lipid metabolism	ko01100//Metabolic pathways;ko00561//Glycerolipid metabolism	K14457;K14457	GO:0005789//endoplasmic reticulum membrane;GO:0016021//integral component of membrane	GO:0008374//O-acyltransferase activity	GO:0006629//lipid metabolic process;GO:0007498//mesoderm development;GO:0034389//lipid droplet organization	--
FBgn0052029	255	264	321	809	814	977	13.269	13.807	18.142	38.547	39.13	51.811	15.0727	43.1627	1.51785	8.49998e-23	7.69662e-21	Cpr66D	Cuticular protein 66D	-	-	-	-	GO:0031012//extracellular matrix;GO:0062129//chitin-based extracellular matrix	GO:0005212//structural constituent of eye lens;GO:0008010//structural constituent of chitin-based larval cuticle	GO:0040003//chitin-based cuticle development	--
FBgn0032699	326	363	475	1465	1360	1075	6.525	7.303	10.229	26.818	25.081	21.911	8.019	24.6033	1.61736	9.60634e-23	8.63841e-21	CG10383	NP_001286055.1 uncharacterized protein Dmel_CG10383, isoform B [Drosophila melanogaster]	-	-	-	-	GO:0016021//integral component of membrane	GO:0016787//hydrolase activity	GO:0008340//determination of adult lifespan	--
FBgn0030310	344	263	305	939	845	882	25.851	20.295	25.221	67.226	60.145	69.5	23.789	65.6237	1.46392	1.32029e-22	1.17913e-20	PGRP-SA	Peptidoglycan recognition protein SA	Organismal Systems	Immune system	ko04624//Toll and Imd signaling pathway	K01446	GO:0005576//extracellular region	GO:0008233//peptidase activity;GO:0008270//zinc ion binding;GO:0008745//N-acetylmuramoyl-L-alanine amidase activity;GO:0016019//peptidoglycan immune receptor activity;GO:0032500//muramyl dipeptide binding;GO:0038187//pattern recognition receptor activity;GO:0042834//peptidoglycan binding	GO:0006965//positive regulation of biosynthetic process of antibacterial peptides active against Gram-positive bacteria;GO:0009253//peptidoglycan catabolic process;GO:0032494//response to peptidoglycan;GO:0045087//innate immune response;GO:0045752//positive regulation of Toll signaling pathway;GO:0050830//defense response to Gram-positive bacterium	--
FBgn0031490	204	169	134	611	710	581	4.378	3.645	3.123	12.006	14.06	12.706	3.71533	12.924	1.79849	1.53887e-22	1.36499e-20	CG17264	NP_001259978.1 uncharacterized protein Dmel_CG17264, isoform B [Drosophila melanogaster]	-	-	-	-	-	-	-	--
FBgn0266455	501	363	621	2058	2117	1441	102.785	74.854	138.38	386.634	401.252	301.303	105.34	363.063	1.78517	1.97891e-22	1.74344e-20	CG45080	NP_001287312.1 uncharacterized protein Dmel_CG45080 [Drosophila melanogaster]	-	-	-	-	-	-	-	--
FBgn0263762	570	373	419	1562	1465	1291	76.238	53.357	65.24	196.5	182.744	178.675	64.945	185.973	1.5178	2.00653e-22	1.75591e-20	CG43679	NP_001261855.1 uncharacterized protein Dmel_CG43679, isoform A [Drosophila melanogaster]	-	-	-	-	-	-	-	--
FBgn0039760	578	590	509	1422	1337	1333	22.258	22.843	21.343	50.144	47.588	52.343	22.148	50.025	1.17547	2.07965e-22	1.80777e-20	CG9682	NP_001287607.1 uncharacterized protein Dmel_CG9682, isoform B [Drosophila melanogaster]	-	-	-	-	-	-	-	--
FBgn0086356	3102	2545	2571	892	1085	1169	75.731	62.45	68.174	19.941	24.472	29.086	68.785	24.4997	-1.48933	2.27137e-22	1.96135e-20	tum	tumbleweed	-	-	-	-	GO:0005634//nucleus;GO:0048471//perinuclear region of cytoplasm;GO:0097149//centralspindlin complex	GO:0005096//GTPase activator activity	GO:0000281//mitotic cytokinesis;GO:0001709//cell fate determination;GO:0007165//signal transduction;GO:0007266//Rho protein signal transduction;GO:0007525//somatic muscle development;GO:0009611//response to wounding;GO:0032465//regulation of cytokinesis;GO:0032507//maintenance of protein location in cell;GO:0034613//cellular protein localization;GO:0042059//negative regulation of epidermal growth…	--
FBgn0050151	161	199	264	806	715	751	9.614	11.944	17.123	44.073	39.444	45.705	12.8937	43.074	1.74015	2.78633e-22	2.39019e-20	CG30151	AAN71485.1 RE70748p, partial [Drosophila melanogaster]	-	-	-	-	-	-	-	--
FBgn0033980	131	148	186	630	531	540	4.178	4.745	6.444	18.401	15.647	17.554	5.12233	17.2007	1.74759	3.84474e-22	3.27657e-20	Cyp6a20	Cyp6a20	-	-	-	-	GO:0005789//endoplasmic reticulum membrane	GO:0004497//monooxygenase activity;GO:0005506//iron ion binding;GO:0016705//oxidoreductase activity, acting on paired donors, with incorporation or reduction of molecular oxygen;GO:0020037//heme binding	GO:0002118//aggressive behavior;GO:0050829//defense response to Gram-negative bacterium	--
FBgn0040959	260	272	285	719	888	769	41.373	43.504	49.258	104.769	130.545	124.715	44.7117	120.01	1.42443	4.84019e-22	4.07169e-20	Peritrophin-15a	Peritrophin-15a	-	-	-	-	GO:0062129//chitin-based extracellular matrix	GO:0008061//chitin binding;GO:0016490//structural constituent of peritrophic membrane	-	--
FBgn0031560	619	419	549	2084	1584	1494	109.41	74.438	105.397	337.308	258.658	269.132	96.415	288.366	1.58057	4.96679e-22	4.15141e-20	CG16713	NP_608799.1 uncharacterized protein Dmel_CG16713 [Drosophila melanogaster]	-	-	-	-	-	GO:0004867//serine-type endopeptidase inhibitor activity	-	--
FBgn0038930	337	269	523	2276	1905	1242	37.453	30.753	63.626	233.478	196.199	140.9	43.944	190.192	2.11372	5.01977e-22	4.16896e-20	BomT3	Bomanin Tailed 3	-	-	-	-	-	-	-	--
FBgn0085241	2353	1335	1628	6544	7236	4960	493.223	281.296	370.717	1256.11	1401.27	1059.62	381.745	1239	1.69849	5.16341e-22	4.26112e-20	CG34212	NP_001097196.1 uncharacterized protein Dmel_CG34212, isoform A [Drosophila melanogaster]	-	-	-	-	-	-	-	--
FBgn0004431	99	59	45	384	420	379	10.083	6.04	4.978	35.815	39.521	39.342	7.03367	38.226	2.44221	5.50827e-22	4.51713e-20	LysX	Lysozyme X	-	-	-	-	GO:0005615//extracellular space	GO:0003796//lysozyme activity	GO:0008152//metabolic process;GO:0019835//cytolysis;GO:0050829//defense response to Gram-negative bacterium	--
FBgn0035673	373	447	498	1234	1129	1231	15.294	18.422	22.178	46.333	42.767	51.442	18.6313	46.8473	1.33024	5.73665e-22	4.67501e-20	CG6602	NP_648020.1 uncharacterized protein Dmel_CG6602 [Drosophila melanogaster]	-	-	-	-	-	-	-	--
FBgn0032705	2978	2525	2313	854	1081	1053	75.163	64.067	63.4	19.738	25.206	27.087	67.5433	24.0103	-1.49216	6.29377e-22	5.09717e-20	Grip71	Grip71	-	-	-	-	GO:0000242//pericentriolar material;GO:0000922//spindle pole;GO:0005737//cytoplasm;GO:0005814//centriole;GO:0036064//ciliary basal body	GO:0005515//protein binding;GO:0043015//gamma-tubulin binding	GO:0000278//mitotic cell cycle;GO:0007057//spindle assembly involved in female meiosis I;GO:0007098//centrosome cycle;GO:0051726//regulation of cell cycle;GO:0071539//protein localization to centrosome	--
FBgn0033205	1872	1963	1515	4234	4143	4023	88.873	93.67	78.121	184.068	181.712	194.654	86.888	186.811	1.10435	7.05949e-22	5.68202e-20	CG2064	ACO72856.1 FI07747p, partial [Drosophila melanogaster]	Metabolism;Metabolism	Global and overview maps;Metabolism of cofactors and vitamins	ko01100//Metabolic pathways;ko00830//Retinol metabolism	K11161;K11161	GO:0012505//endomembrane system	GO:0052650//NADP-retinol dehydrogenase activity	-	--
FBgn0036948	965	951	730	2484	2210	2148	41.9	41.504	34.427	98.765	88.652	95.054	39.277	94.157	1.26138	7.4396e-22	5.95123e-20	CG7298	AAL28884.2 LD26327p, partial [Drosophila melanogaster]	-	-	-	-	GO:0005576//extracellular region	GO:0008061//chitin binding	-	--
FBgn0000405	26655	22002	22366	9676	11719	9648	582.258	482.999	530.532	193.578	236.528	214.752	531.93	214.953	-1.30722	9.87788e-22	7.85352e-20	CycB	Cyclin B	Environmental Information Processing	Signal transduction	ko04068//FoxO signaling pathway	K21770	GO:0000307//cyclin-dependent protein kinase holoenzyme complex;GO:0000775//chromosome, centromeric region;GO:0005634//nucleus;GO:0005737//cytoplasm;GO:0005813//centrosome;GO:0005819//spindle;GO:0042025//host cell nucleus;GO:0051233//spindle midzone	GO:0016538//cyclin-dependent protein serine/threonine kinase regulator activity	GO:0000079//regulation of cyclin-dependent protein serine/threonine kinase activity;GO:0000086//G2/M transition of mitotic cell cycle;GO:0000281//mitotic cytokinesis;GO:0001700//embryonic development via the syncytial blastoderm;GO:0007079//mitotic chromosome movement towards spindle pole;GO:0008608//attachment of spindle microtubules to kinetochore;GO:0035186//syncytial blastoderm mitotic cell c…	--
FBgn0052185	46	36	19	281	223	273	6.277	4.937	2.816	35.11	28.111	37.965	4.67667	33.7287	2.85042	1.12182e-21	8.86508e-20	edin	elevated during infection	-	-	-	-	GO:0005576//extracellular region;GO:0005615//extracellular space	-	GO:0006959//humoral immune response;GO:0050829//defense response to Gram-negative bacterium;GO:0050830//defense response to Gram-positive bacterium	--
FBgn0003231	5941	5998	6042	15258	13949	11443	147.097	149.009	161.453	345.163	318.528	288.458	152.52	317.383	1.05723	1.17767e-21	9.25039e-20	ref(2)P	refractory to sigma P	-	-	-	-	GO:0005634//nucleus;GO:0005737//cytoplasm;GO:0005776//autophagosome;GO:0016235//aggresome;GO:0044753//amphisome	GO:0003677//DNA binding;GO:0005080//protein kinase C binding;GO:0005515//protein binding;GO:0008270//zinc ion binding;GO:0070530//K63-linked polyubiquitin modification-dependent protein binding	GO:0000423//mitophagy;GO:0007005//mitochondrion organization;GO:0007032//endosome organization;GO:0030382//sperm mitochondrion organization;GO:0035973//aggrephagy;GO:0061912//selective autophagy	--
FBgn0029762	503	496	554	1666	1451	1197	11.628	11.524	13.91	35.266	30.988	28.201	12.354	31.485	1.34969	1.25794e-21	9.82169e-20	NAAT1	Nutrient Amino Acid Transporter 1	Organismal Systems	Nervous system	ko04721//Synaptic vesicle cycle	K05038	GO:0005886//plasma membrane;GO:0005887//integral component of plasma membrane;GO:0016021//integral component of membrane	GO:0005283//amino acid:sodium symporter activity;GO:0005326//neurotransmitter transmembrane transporter activity;GO:0005416//amino acid:cation symporter activity;GO:0015175//neutral amino acid transmembrane transporter activity;GO:0015179//L-amino acid transmembrane transporter activity;GO:0015293//symporter activity;GO:0042943//D-amino acid transmembrane transporter activity	GO:0003333//amino acid transmembrane transport;GO:0006814//sodium ion transport;GO:0006836//neurotransmitter transport;GO:0015804//neutral amino acid transport;GO:0015807//L-amino acid transport;GO:0042940//D-amino acid transport	--
FBgn0035359	269	293	211	856	778	756	14.243	15.733	12.304	41.63	38.28	40.947	14.0933	40.2857	1.51525	1.29102e-21	1.002e-19	CG1143	NP_001261335.1 uncharacterized protein Dmel_CG1143, isoform B [Drosophila melanogaster]	-	-	-	-	-	-	-	--
FBgn0031489	1590	1451	1420	3477	3176	3030	72.142	65.349	69.169	144.843	133.515	139.848	68.8867	139.402	1.01695	1.35373e-21	1.04445e-19	CG17224	NP_001162855.1 uncharacterized protein Dmel_CG17224, isoform C [Drosophila melanogaster]	Metabolism;Metabolism;Metabolism	Global and overview maps;Xenobiotics biodegradation and metabolism;Nucleotide metabolism	ko01100//Metabolic pathways;ko00983//Drug metabolism - other enzymes;ko00240//Pyrimidine metabolism	K00757;K00757;K00757	GO:0005634//nucleus;GO:0005737//cytoplasm	GO:0003824//catalytic activity;GO:0004850//uridine phosphorylase activity	GO:0009116//nucleoside metabolic process;GO:0009166//nucleotide catabolic process	--
FBgn0040968	1015	1083	1264	2961	2545	2555	68.41	73.294	92.846	181.856	158.133	173.801	78.1833	171.263	1.13128	1.5468e-21	1.18639e-19	CG14933	NP_001285852.1 uncharacterized protein Dmel_CG14933, isoform C [Drosophila melanogaster]	-	-	-	-	-	GO:0005515//protein binding	-	--
FBgn0022700	275	272	163	1010	793	902	10.725	10.662	6.904	36.069	28.571	35.851	9.43033	33.497	1.82865	1.60109e-21	1.22086e-19	Cht4	Chitinase 4	Metabolism;Metabolism	Global and overview maps;Carbohydrate metabolism	ko01100//Metabolic pathways;ko00520//Amino sugar and nucleotide sugar metabolism	K01183;K01183	GO:0005576//extracellular region;GO:0005615//extracellular space	GO:0004553//hydrolase activity, hydrolyzing O-glycosyl compounds;GO:0004568//chitinase activity;GO:0008061//chitin binding	GO:0005975//carbohydrate metabolic process;GO:0006032//chitin catabolic process	--
FBgn0034511	1771	1196	1327	6090	4319	3827	197.544	134.088	160.769	622.046	445.072	435.06	164.134	500.726	1.60915	1.66228e-21	1.26014e-19	GNBP-like3	GNBP-like 3	-	-	-	-	GO:0009986//cell surface	GO:0030246//carbohydrate binding	GO:0009595//detection of biotic stimulus;GO:0009620//response to fungus;GO:0098542//defense response to other organism	--
FBgn0030817	5136	4448	4134	1859	2179	1930	151.348	131.67	132.256	49.803	59.082	58.117	138.425	55.6673	-1.3142	1.68719e-21	1.27163e-19	CG4991	NP_001259638.1 uncharacterized protein Dmel_CG4991, isoform D [Drosophila melanogaster]	Organismal Systems	Digestive system	ko04974//Protein digestion and absorption	K14209	GO:0016021//integral component of membrane	GO:0015171//amino acid transmembrane transporter activity	GO:0003333//amino acid transmembrane transport	--
FBgn0039585	169	184	225	19	4	19	6.813	7.455	9.852	0.701	0.149	0.781	8.04	0.543667	-3.8864	1.83387e-21	1.37425e-19	CG1894	NP_651620.1 uncharacterized protein Dmel_CG1894 [Drosophila melanogaster]	-	-	-	-	GO:0000123//histone acetyltransferase complex;GO:0005634//nucleus;GO:0072487//MSL complex	GO:0004402//histone acetyltransferase activity;GO:0042393//histone binding;GO:0046972//histone acetyltransferase activity (H4-K16 specific)	GO:0006355//regulation of transcription, DNA-templated;GO:0016573//histone acetylation;GO:0045892//negative regulation of transcription, DNA-templated;GO:0045944//positive regulation of transcription by RNA polymerase II	--
FBgn0037140	526	465	424	1325	1304	1112	14.492	12.877	12.688	33.429	33.191	31.225	13.3523	32.615	1.28844	2.46609e-21	1.82701e-19	SLC22A	SLC22A family member	-	-	-	-	GO:0016021//integral component of membrane	GO:0015220//choline transmembrane transporter activity;GO:0022857//transmembrane transporter activity	GO:0007613//memory;GO:0015870//acetylcholine transport;GO:0032223//negative regulation of synaptic transmission, cholinergic;GO:0055085//transmembrane transport;GO:0090328//regulation of olfactory learning	--
FBgn0033582	540	560	494	1286	1232	1241	33.037	34.465	32.622	71.646	69.37	77.207	33.3747	72.741	1.12402	3.61659e-21	2.66422e-19	CG9084	NP_001260884.1 uncharacterized protein Dmel_CG9084, isoform C [Drosophila melanogaster]	-	-	-	-	GO:0005886//plasma membrane	GO:0017128//phospholipid scramblase activity	GO:0017121//plasma membrane phospholipid scrambling	--
FBgn0002930	3430	3461	3335	9089	7643	6729	120.659	122.371	127.423	292.781	248.389	241.247	123.484	260.806	1.07865	4.07875e-21	2.9878e-19	nec	necrotic	Organismal Systems	Immune system	ko04624//Toll and Imd signaling pathway	K20698	GO:0005615//extracellular space	GO:0004867//serine-type endopeptidase inhibitor activity	GO:0009620//response to fungus;GO:0010951//negative regulation of endopeptidase activity;GO:0045751//negative regulation of Toll signaling pathway;GO:0045824//negative regulation of innate immune response;GO:0045861//negative regulation of proteolysis;GO:1900004//negative regulation of serine-type endopeptidase activity	--
FBgn0044810	762	1312	1453	5134	3939	3796	72.713	125.835	150.594	448.613	347.251	369.171	116.381	388.345	1.73849	4.14521e-21	3.01952e-19	TotX	Turandot X	-	-	-	-	GO:0005576//extracellular region;GO:0005615//extracellular space	-	GO:0002376//immune system process;GO:0006979//response to oxidative stress;GO:0009408//response to heat;GO:0009617//response to bacterium;GO:0034599//cellular response to oxidative stress;GO:0034605//cellular response to heat;GO:0045087//innate immune response	--
FBgn0041180	3519	3259	2525	8629	8260	6878	43.023	40.056	33.551	96.61	93.317	85.704	38.8767	91.877	1.2408	4.59027e-21	3.32514e-19	Tep4	Thioester-containing protein 4	-	-	-	-	GO:0005576//extracellular region;GO:0005615//extracellular space	GO:0004866//endopeptidase inhibitor activity;GO:0004867//serine-type endopeptidase inhibitor activity	GO:0009620//response to fungus;GO:0032504//multicellular organism reproduction;GO:0045087//innate immune response	--
FBgn0286788	3456	2921	2485	1148	1229	1194	62.985	53.507	49.19	19.159	20.693	22.178	55.2273	20.6767	-1.41738	5.31148e-21	3.82632e-19	Orc1	Origin recognition complex subunit 1	Cellular Processes	Cell growth and death	ko04110//Cell cycle	K02603	GO:0005664//nuclear origin of replication recognition complex	GO:0003677//DNA binding;GO:0003682//chromatin binding;GO:0005524//ATP binding;GO:0016887//ATP hydrolysis activity;GO:0046872//metal ion binding	GO:0006270//DNA replication initiation;GO:0006277//DNA amplification	--
FBgn0040502	1287	1674	1251	3334	3508	4308	117.166	153.176	123.699	277.939	295.042	399.709	131.347	324.23	1.30363	6.55258e-21	4.66881e-19	CG8343	NP_610207.1 uncharacterized protein Dmel_CG8343 [Drosophila melanogaster]	-	-	-	-	-	GO:0030246//carbohydrate binding	-	--
FBgn0034295	3616	3597	4242	10861	8903	7948	170.124	170.094	216.767	467.915	386.968	381.101	185.662	411.995	1.14995	7.61227e-21	5.39437e-19	CG10911	NP_611286.1 uncharacterized protein Dmel_CG10911 [Drosophila melanogaster]	-	-	-	-	-	-	-	--
FBgn0032435	1650	1406	978	4011	3836	3859	34.555	29.595	22.246	76.92	74.218	82.366	28.7987	77.8347	1.43441	8.01105e-21	5.64628e-19	Oatp33Eb	Organic anion transporting polypeptide 33Eb	-	-	-	-	GO:0005887//integral component of plasma membrane;GO:0016020//membrane;GO:0016328//lateral plasma membrane	GO:0005515//protein binding;GO:0015347//sodium-independent organic anion transmembrane transporter activity;GO:0022804//active transmembrane transporter activity;GO:0022857//transmembrane transporter activity	GO:0043252//sodium-independent organic anion transport;GO:0055085//transmembrane transport;GO:0071702//organic substance transport	--
FBgn0037396	741	1062	986	3226	2419	2428	37.045	53.092	53.512	148.292	112.154	124.061	47.883	128.169	1.42046	1.27153e-20	8.91367e-19	CG11459	NP_001287191.1 uncharacterized protein Dmel_CG11459, isoform B [Drosophila melanogaster]	Cellular Processes;Cellular Processes;Cellular Processes	Transport and catabolism;Transport and catabolism;Transport and catabolism	ko04142//Lysosome;ko04140//Autophagy - animal;ko04145//Phagosome	K01365;K01365;K01365	GO:0005615//extracellular space;GO:0005764//lysosome	GO:0004197//cysteine-type endopeptidase activity;GO:0008234//cysteine-type peptidase activity	GO:0006508//proteolysis;GO:0006955//immune response;GO:0051603//proteolysis involved in cellular protein catabolic process	--
FBgn0262007	875	607	458	2327	2122	2142	28.69	20.004	16.311	69.867	64.278	71.579	21.6683	68.5747	1.66209	1.47489e-20	1.0284e-18	CG42825	NP_729590.1 uncharacterized protein Dmel_CG42825 [Drosophila melanogaster]	-	-	-	-	GO:0016021//integral component of membrane	GO:0022857//transmembrane transporter activity	GO:0055085//transmembrane transport	--
FBgn0031929	1075	1240	1469	3612	3094	2906	45.474	52.721	67.493	139.788	120.913	125.283	55.2293	128.661	1.22007	1.55007e-20	1.07507e-18	CG18585	AAV36866.1 RE64060p, partial [Drosophila melanogaster]	Organismal Systems;Organismal Systems	Digestive system;Digestive system	ko04974//Protein digestion and absorption;ko04972//Pancreatic secretion	K08779;K08779	GO:0005615//extracellular space	GO:0004181//metallocarboxypeptidase activity;GO:0008270//zinc ion binding	GO:0006508//proteolysis	--
FBgn0034638	2211	2748	3557	9323	8464	6970	125.761	156.878	219.232	483.492	442.813	403.275	167.29	443.193	1.40558	1.59081e-20	1.09749e-18	CG10433	NP_001286683.1 uncharacterized protein Dmel_CG10433, isoform C [Drosophila melanogaster]	-	-	-	-	GO:0005615//extracellular space	-	GO:0006952//defense response;GO:0032504//multicellular organism reproduction;GO:0045924//regulation of female receptivity	--
FBgn0035583	794	861	864	2166	1874	1780	66.879	72.893	79.044	167.065	145.828	152.804	72.9387	155.232	1.08967	1.64645e-20	1.1299e-18	CG13704	NP_647939.1 uncharacterized protein Dmel_CG13704 [Drosophila melanogaster]	-	-	-	-	GO:0016021//integral component of membrane	-	-	--
FBgn0036875	665	985	816	2271	2256	2039	29.63	41.351	35.713	87.179	85.451	87.142	35.5647	86.5907	1.28377	1.66644e-20	1.13763e-18	CG9449	NP_001137976.1 uncharacterized protein Dmel_CG9449, isoform F [Drosophila melanogaster]	-	-	-	-	GO:0005634//nucleus;GO:0016021//integral component of membrane;GO:0070062//extracellular exosome	GO:0003993//acid phosphatase activity	GO:0016311//dephosphorylation	--
FBgn0003655	5516	4961	4493	1700	2257	2188	156.709	141.662	138.642	44.226	59.239	63.353	145.671	55.606	-1.3894	1.76787e-20	1.19437e-18	swa	swallow	-	-	-	-	GO:0005634//nucleus	GO:0003729//mRNA binding;GO:0070840//dynein complex binding	GO:0007015//actin filament organization;GO:0007049//cell cycle;GO:0007317//regulation of pole plasm oskar mRNA localization;GO:0008595//anterior/posterior axis specification, embryo;GO:0019094//pole plasm mRNA localization;GO:0045450//bicoid mRNA localization;GO:0051301//cell division	--
FBgn0034605	465	557	584	1457	1516	1226	14.631	17.622	19.946	42.011	44.067	39.33	17.3997	41.8027	1.26454	1.93962e-20	1.30364e-18	Ugt49C1	UDP-glycosyltransferase family 49 member C1	Metabolism;Metabolism;Metabolism;Metabolism;Metabolism;Metabolism;Metabolism;Metabolism	Global and overview maps;Xenobiotics biodegradation and metabolism;Xenobiotics biodegradation and metabolism;Xenobiotics biodegradation and metabolism;Carbohydrate metabolism;Metabolism of cofactors and vitamins;Metabolism of cofactors and vitamins;Carbohydrate metabolism	ko01100//Metabolic pathways;ko00983//Drug metabolism - other enzymes;ko00980//Metabolism of xenobiotics by cytochrome P450;ko00982//Drug metabolism - cytochrome P450;ko00040//Pentose and glucuronate interconversions;ko00860//Porphyrin metabolism;ko00830//Retinol metabolism;ko00053//Ascorbate and aldarate metabolism	K00699;K00699;K00699;K00699;K00699;K00699;K00699;K00699	GO:0016021//integral component of membrane;GO:0043231//intracellular membrane-bounded organelle	GO:0008194//UDP-glycosyltransferase activity;GO:0015020//glucuronosyltransferase activity	-	--
FBgn0040609	255	410	416	1364	1183	1088	26.971	43.539	47.769	131.931	115.428	117.137	39.4263	121.499	1.62371	2.15623e-20	1.4418e-18	CG3348	NP_001303428.1 uncharacterized protein Dmel_CG3348, isoform B [Drosophila melanogaster]	-	-	-	-	GO:0005576//extracellular region	GO:0008061//chitin binding	-	--
FBgn0033188	756	697	652	1716	1821	1494	21.907	20.433	20.673	46.123	49.276	44.573	21.0043	46.6573	1.15142	2.25706e-20	1.50152e-18	Drat	Death resistor Adh domain containing target	-	-	-	-	-	GO:0008106//alcohol dehydrogenase (NADP+) activity;GO:0016491//oxidoreductase activity;GO:0016616//oxidoreductase activity, acting on the CH-OH group of donors, NAD or NADP as acceptor	GO:0001666//response to hypoxia;GO:0006066//alcohol metabolic process;GO:0071361//cellular response to ethanol	--
FBgn0030241	4238	3555	2974	1238	1554	1309	100.434	84.678	76.55	26.866	34.023	31.616	87.2207	30.835	-1.5001	2.32327e-20	1.53773e-18	feo	fascetto	-	-	-	-	GO:0005737//cytoplasm;GO:0005819//spindle;GO:0051233//spindle midzone;GO:1990023//mitotic spindle midzone	GO:0008017//microtubule binding	GO:0000226//microtubule cytoskeleton organization;GO:0000281//mitotic cytokinesis;GO:0000916//actomyosin contractile ring contraction;GO:0007052//mitotic spindle organization;GO:0051256//mitotic spindle midzone assembly	--
FBgn0034335	437	337	315	1082	1014	975	30.209	23.415	23.651	68.492	64.758	68.691	25.7583	67.3137	1.38586	2.6379e-20	1.73715e-18	GstE1	Glutathione S transferase E1	Metabolism;Metabolism;Metabolism;Metabolism;Metabolism	Global and overview maps;Xenobiotics biodegradation and metabolism;Metabolism of other amino acids;Xenobiotics biodegradation and metabolism;Xenobiotics biodegradation and metabolism	ko01100//Metabolic pathways;ko00983//Drug metabolism - other enzymes;ko00480//Glutathione metabolism;ko00980//Metabolism of xenobiotics by cytochrome P450;ko00982//Drug metabolism - cytochrome P450	K00799;K00799;K00799;K00799;K00799	GO:0005737//cytoplasm	GO:0004364//glutathione transferase activity	GO:0006749//glutathione metabolic process;GO:0009408//response to heat	--
FBgn0032285	1753	2227	1556	9332	6670	4544	86.513	110.467	83.406	421.73	304.107	228.551	93.462	318.129	1.76716	2.86023e-20	1.8741e-18	CG17108	-	-	-	-	-	-	-	-	--
FBgn0034693	389	478	465	1366	1192	1049	10.868	13.056	13.798	31.856	28.581	28.757	12.574	29.7313	1.24154	4.01539e-20	2.61783e-18	CG11073	NP_611638.2 uncharacterized protein Dmel_CG11073, isoform A [Drosophila melanogaster]	-	-	-	-	-	-	-	--
FBgn0038575	2258	2198	1923	721	936	924	82.972	81.159	76.75	24.265	31.777	34.611	80.2937	30.2177	-1.40989	4.5189e-20	2.93144e-18	CG7208	NP_650683.3 uncharacterized protein Dmel_CG7208, isoform A [Drosophila melanogaster]	-	-	-	-	-	-	-	--
FBgn0034662	3066	3384	2270	7890	8234	6666	19.18	21.277	15.423	45.197	47.586	42.499	18.6267	45.094	1.27557	4.78452e-20	3.08838e-18	CG13492	NP_726121.3 uncharacterized protein Dmel_CG13492 [Drosophila melanogaster]	-	-	-	-	-	-	-	--
FBgn0051041	933	571	533	2037	2408	2294	76.566	47.098	47.508	153.075	182.563	191.864	57.0573	175.834	1.62373	4.8251e-20	3.09923e-18	CG31041	ACH92339.1 FI06429p, partial [Drosophila melanogaster]	-	-	-	-	-	-	-	--
FBgn0011280	717	951	1051	2604	2777	2149	65.388	87.523	104.564	218.914	234.677	200.238	85.825	217.943	1.34448	4.88254e-20	3.12075e-18	Obp19d	Odorant-binding protein 19d	-	-	-	-	GO:0005576//extracellular region	GO:0005549//odorant binding;GO:0005550//pheromone binding	GO:0007606//sensory perception of chemical stimulus;GO:0007608//sensory perception of smell	--
FBgn0032472	573	530	794	2328	1851	1666	80.144	74.597	120.786	298.582	239.384	237.515	91.8423	258.494	1.4929	5.12189e-20	3.25777e-18	CG9928	NP_001285884.1 uncharacterized protein Dmel_CG9928, isoform B [Drosophila melanogaster]	-	-	-	-	-	-	-	--
FBgn0039593	207	135	219	920	647	651	9.795	6.421	11.255	39.864	28.284	31.395	9.157	33.181	1.85741	5.29232e-20	3.34983e-18	Sid	Stress induced DNase	-	-	-	-	GO:0005634//nucleus;GO:0005737//cytoplasm;GO:0005739//mitochondrion;GO:0005743//mitochondrial inner membrane;GO:0016020//membrane	GO:0000014//single-stranded DNA endodeoxyribonuclease activity;GO:0003676//nucleic acid binding;GO:0004518//nuclease activity;GO:0004519//endonuclease activity;GO:0004521//endoribonuclease activity;GO:0004536//deoxyribonuclease activity;GO:0004540//ribonuclease activity;GO:0016787//hydrolase activity;GO:0046872//metal ion binding	GO:0000737//DNA catabolic process, endonucleolytic;GO:0006309//apoptotic DNA fragmentation;GO:0006979//response to oxidative stress;GO:0009617//response to bacterium;GO:0090305//nucleic acid phosphodiester bond hydrolysis;GO:1901562//response to paraquat	--
FBgn0037844	2025	1979	1793	610	842	813	92.322	90.686	88.787	25.467	35.465	37.776	90.5983	32.9027	-1.46128	6.22082e-20	3.91851e-18	CG4570	NP_650027.1 uncharacterized protein Dmel_CG4570 [Drosophila melanogaster]	-	-	-	-	-	GO:0003676//nucleic acid binding	-	--
FBgn0030864	1547	1486	1383	643	681	666	54.088	52.221	52.52	20.587	21.997	23.732	52.943	22.1053	-1.26005	6.5332e-20	4.0955e-18	CG8173	NP_573239.1 uncharacterized protein Dmel_CG8173 [Drosophila melanogaster]	-	-	-	-	-	GO:0004672//protein kinase activity;GO:0004674//protein serine/threonine kinase activity;GO:0005524//ATP binding	GO:0000278//mitotic cell cycle;GO:0006468//protein phosphorylation	--
FBgn0028949	75	70	121	407	395	388	5.032	4.899	9.151	25.728	25.087	27.24	6.36067	26.0183	2.03228	6.71666e-20	4.17041e-18	CG15254	NP_001285959.1 uncharacterized protein Dmel_CG15254, isoform B [Drosophila melanogaster]	-	-	-	-	-	GO:0004222//metalloendopeptidase activity;GO:0008237//metallopeptidase activity;GO:0008270//zinc ion binding	GO:0006508//proteolysis	--
FBgn0041181	464	474	446	1217	1340	1015	5.409	5.554	5.647	12.991	14.431	12.058	5.53667	13.16	1.24907	7.33473e-20	4.53259e-18	Tep3	Thioester-containing protein 3	-	-	-	-	GO:0005576//extracellular region;GO:0005615//extracellular space	GO:0004866//endopeptidase inhibitor activity	GO:0045087//innate immune response;GO:0050830//defense response to Gram-positive bacterium;GO:0098542//defense response to other organism	--
FBgn0053470	28363	22661	23260	79673	60948	52794	1782.92	1429.28	1584.89	4578.36	3535.54	3383.73	1599.03	3832.54	1.26111	7.97345e-20	4.90405e-18	CG33470	NP_725287.3 immune induced molecule prepropeptide, isoform C [Drosophila melanogaster]	-	-	-	-	GO:0005576//extracellular region;GO:0005615//extracellular space	-	GO:0006952//defense response;GO:0006959//humoral immune response;GO:0009617//response to bacterium;GO:0019731//antibacterial humoral response;GO:0045087//innate immune response	--
FBgn0050269	568	551	505	1258	1338	1184	48.956	44.798	45.51	99.36	107.483	103.86	46.4213	103.568	1.15771	9.43744e-20	5.77722e-18	CG30269	NP_001303360.1 uncharacterized protein Dmel_CG30269, isoform B [Drosophila melanogaster]	Cellular Processes	Transport and catabolism	ko04142//Lysosome	K19363	GO:0005765//lysosomal membrane;GO:0010008//endosome membrane;GO:0016021//integral component of membrane	GO:0046872//metal ion binding	-	zf-LITAF-like
FBgn0003067	18774	16296	14855	45670	40097	33112	433.818	378.47	372.829	966.379	855.983	779.786	395.039	867.383	1.13467	1.01775e-19	6.17232e-18	Pepck1	Phosphoenolpyruvate carboxykinase 1	Metabolism;Environmental Information Processing;Metabolism;Metabolism;Metabolism	Global and overview maps;Signal transduction;Carbohydrate metabolism;Carbohydrate metabolism;Carbohydrate metabolism	ko01100//Metabolic pathways;ko04068//FoxO signaling pathway;ko00010//Glycolysis / Gluconeogenesis;ko00620//Pyruvate metabolism;ko00020//Citrate cycle (TCA cycle)	K01596;K01596;K01596;K01596;K01596	GO:0005739//mitochondrion;GO:0005829//cytosol	GO:0004611//phosphoenolpyruvate carboxykinase activity;GO:0004613//phosphoenolpyruvate carboxykinase (GTP) activity;GO:0005525//GTP binding;GO:0017076//purine nucleotide binding;GO:0030145//manganese ion binding	GO:0006090//pyruvate metabolic process;GO:0006094//gluconeogenesis;GO:0019543//propionate catabolic process;GO:0033993//response to lipid;GO:0042594//response to starvation;GO:0046327//glycerol biosynthetic process from pyruvate;GO:0071333//cellular response to glucose stimulus	--
FBgn0266488	18774	16296	14855	45670	40097	33112	433.818	378.47	372.829	966.379	855.983	779.786	395.039	867.383	1.13467	1.01775e-19	6.17232e-18	CG45087	NP_001286576.1 uncharacterized protein Dmel_CG45087 [Drosophila melanogaster]	-	-	-	-	-	-	-	--
FBgn0034400	503	427	388	1539	1398	1034	3.412	2.911	2.858	9.559	8.761	7.148	3.06033	8.48933	1.47196	1.05715e-19	6.38155e-18	CG15099	NP_001261081.1 uncharacterized protein Dmel_CG15099, isoform B [Drosophila melanogaster]	-	-	-	-	GO:0000139//Golgi membrane;GO:0005768//endosome;GO:0005802//trans-Golgi network;GO:0005829//cytosol	-	GO:0006895//Golgi to endosome transport;GO:0015031//protein transport	--
FBgn0262794	13	13	12	130	150	133	1.693	1.702	1.698	15.507	18.051	17.657	1.69767	17.0717	3.32998	1.42502e-19	8.56262e-18	CG43175	NP_001247154.1 uncharacterized protein Dmel_CG43175, isoform A [Drosophila melanogaster]	-	-	-	-	-	-	GO:0009611//response to wounding	--
FBgn0043364	125	76	117	695	503	382	3.478	2.076	3.436	17.731	12.716	10.587	2.99667	13.678	2.19043	1.4565e-19	8.71163e-18	cbt	cabut	-	-	-	-	GO:0005634//nucleus	GO:0000976//transcription cis-regulatory region binding;GO:0000981//DNA-binding transcription factor activity, RNA polymerase II-specific;GO:0043565//sequence-specific DNA binding	GO:0000122//negative regulation of transcription by RNA polymerase II;GO:0007391//dorsal closure;GO:0007423//sensory organ development;GO:0007472//wing disc morphogenesis;GO:0030513//positive regulation of BMP signaling pathway;GO:0045944//positive regulation of transcription by RNA polymerase II;GO:0048190//wing disc dorsal/ventral pattern formation	zf-C2H2
FBgn0034716	1233	1266	1053	3022	2523	2565	24.851	25.647	23.235	55.833	46.949	52.662	24.5777	51.8147	1.07601	1.50781e-19	8.9773e-18	Oatp58Dc	Organic anion transporting polypeptide 58Dc	-	-	-	-	GO:0005887//integral component of plasma membrane;GO:0016020//membrane;GO:0016323//basolateral plasma membrane	GO:0005515//protein binding;GO:0015347//sodium-independent organic anion transmembrane transporter activity;GO:0022804//active transmembrane transporter activity;GO:0022857//transmembrane transporter activity	GO:0009636//response to toxic substance;GO:0043252//sodium-independent organic anion transport;GO:0055085//transmembrane transport;GO:0071702//organic substance transport;GO:0097254//renal tubular secretion	--
FBgn0038337	1181	1458	1160	3044	2809	2737	30.834	38.262	32.752	72.594	67.771	72.539	33.9493	70.968	1.06379	1.64737e-19	9.76367e-18	CG6125	AAN71285.1 RE06328p, partial [Drosophila melanogaster]	-	-	-	-	GO:0005887//integral component of plasma membrane;GO:0016020//membrane;GO:0016021//integral component of membrane	GO:0008271//secondary active sulfate transmembrane transporter activity;GO:0015116//sulfate transmembrane transporter activity;GO:0015301//anion:anion antiporter activity	GO:0055085//transmembrane transport	--
FBgn0287423	7786	9808	13968	31094	30931	28910	989.527	1252.73	1928.08	3617.97	3631.46	3743.96	1390.11	3664.46	1.3984	1.67292e-19	9.87023e-18	Nplp2	Neuropeptide-like precursor 2	-	-	-	-	GO:0005576//extracellular region;GO:0005615//extracellular space	GO:0005184//neuropeptide hormone activity	GO:0006959//humoral immune response;GO:0007218//neuropeptide signaling pathway	--
FBgn0041581	515	480	239	1586	1936	1469	37.264	35.095	18.838	105.845	130.178	108.762	30.399	114.928	1.91864	2.11056e-19	1.23962e-17	AttB	Attacin-B	-	-	-	-	GO:0005576//extracellular region;GO:0005615//extracellular space	-	GO:0019731//antibacterial humoral response;GO:0042742//defense response to bacterium;GO:0045087//innate immune response	--
FBgn0002939	238	312	382	56	21	50	8.03	11.281	14.664	1.867	0.798	1.778	11.325	1.481	-2.93487	2.24047e-19	1.31002e-17	ninaD	neither inactivation nor afterpotential D	Cellular Processes;Organismal Systems;Human Diseases;Organismal Systems;Organismal Systems;Organismal Systems;Organismal Systems;Organismal Systems;Human Diseases;Organismal Systems	Transport and catabolism;Endocrine system;Endocrine and metabolic disease;Digestive system;Digestive system;Digestive system;Digestive system;Endocrine system;Infectious disease: viral;Endocrine system	ko04145//Phagosome;ko04925//Aldosterone synthesis and secretion;ko04934//Cushing syndrome;ko04976//Bile secretion;ko04979//Cholesterol metabolism;ko04977//Vitamin digestion and absorption;ko04975//Fat digestion and absorption;ko04927//Cortisol synthesis and secretion;ko05160//Hepatitis C;ko04913//Ovarian steroidogenesis	K13885;K13885;K13885;K13885;K13885;K13885;K13885;K13885;K13885;K13885	GO:0005886//plasma membrane;GO:0016020//membrane;GO:0016021//integral component of membrane	GO:0005044//scavenger receptor activity	GO:0007602//phototransduction;GO:0007603//phototransduction, visible light;GO:0007604//phototransduction, UV;GO:0016063//rhodopsin biosynthetic process;GO:0046867//carotenoid transport	--
FBgn0031434	829	706	722	294	285	282	30.138	27.334	30.561	9.35	9.421	10.368	29.3443	9.713	-1.59509	3.15086e-19	1.83411e-17	insv	insensitive	-	-	-	-	GO:0005634//nucleus	GO:0003677//DNA binding;GO:0003714//transcription corepressor activity;GO:0043035//chromatin insulator sequence binding;GO:0043565//sequence-specific DNA binding	GO:0045746//negative regulation of Notch signaling pathway;GO:0045892//negative regulation of transcription, DNA-templated	--
FBgn0052834	742	1038	1077	2648	2987	2241	24.329	34.208	38.355	79.505	90.481	74.887	32.2973	81.6243	1.33758	3.2398e-19	1.8762e-17	CG32834	NP_001188996.1 uncharacterized protein Dmel_CG32834 [Drosophila melanogaster]	Environmental Information Processing;Organismal Systems;Organismal Systems;Human Diseases	Signaling molecules and interaction;Digestive system;Digestive system;Infectious disease: viral	ko04080//Neuroactive ligand-receptor interaction;ko04974//Protein digestion and absorption;ko04972//Pancreatic secretion;ko05164//Influenza A	K01312;K01312;K01312;K01312	-	GO:0004252//serine-type endopeptidase activity	GO:0006508//proteolysis	--
FBgn0033079	781	838	968	2345	1992	1875	26.978	29.095	36.318	74.176	63.57	66.01	30.797	67.9187	1.14102	3.25194e-19	1.8762e-17	Fmo-2	Flavin-containing monooxygenase 2	-	-	-	-	GO:0005739//mitochondrion;GO:0005829//cytosol;GO:0043231//intracellular membrane-bounded organelle	GO:0004497//monooxygenase activity;GO:0004499//N,N-dimethylaniline monooxygenase activity;GO:0050660//flavin adenine dinucleotide binding;GO:0050661//NADP binding	-	--
FBgn0038292	2902	2621	2200	6163	5523	5463	112.411	102.045	92.559	218.607	197.646	215.669	102.338	210.641	1.04144	3.51979e-19	2.02178e-17	CG3987	NP_650421.3 uncharacterized protein Dmel_CG3987 [Drosophila melanogaster]	-	-	-	-	-	-	GO:0007498//mesoderm development	--
FBgn0250836	308	192	226	733	819	782	41.243	25.841	32.869	89.879	101.317	106.72	33.3177	99.3053	1.57558	3.57211e-19	2.04284e-17	Acbp3	Acyl-CoA binding protein 3	-	-	-	-	-	GO:0000062//fatty-acyl-CoA binding	-	--
FBgn0285963	338	300	309	1007	923	736	4.013	3.599	4.002	10.969	10.177	8.95	3.87133	10.032	1.37371	3.65996e-19	2.08394e-17	CG46339	NP_001263001.1 uncharacterized protein Dmel_CG46339, isoform D [Drosophila melanogaster]	-	-	-	-	GO:0005737//cytoplasm;GO:0016021//integral component of membrane	GO:0004177//aminopeptidase activity;GO:0008237//metallopeptidase activity;GO:0008270//zinc ion binding;GO:0042277//peptide binding;GO:0070006//metalloaminopeptidase activity	GO:0006508//proteolysis;GO:0016485//protein processing;GO:0035019//somatic stem cell population maintenance;GO:0036098//male germ-line stem cell population maintenance;GO:0043171//peptide catabolic process;GO:0043697//cell dedifferentiation;GO:0060250//germ-line stem-cell niche homeostasis	--
FBgn0034199	166	172	227	715	605	546	21.05	21.923	31.266	83.027	70.878	70.565	24.7463	74.8233	1.59627	4.24564e-19	2.40691e-17	Gbp1	Growth-blocking peptide 1	-	-	-	-	GO:0005615//extracellular space	GO:0005125//cytokine activity	GO:0002225//positive regulation of antimicrobial peptide production;GO:0002922//positive regulation of humoral immune response;GO:0009611//response to wounding;GO:0034112//positive regulation of homotypic cell-cell adhesion;GO:0040018//positive regulation of multicellular organism growth;GO:0043647//inositol phosphate metabolic process;GO:0045926//negative regulation of growth;GO:0046330//positiv…	--
FBgn0041711	503	690	535	1636	1651	1338	15.67	21.605	18.102	46.67	47.516	42.481	18.459	45.5557	1.30331	4.53401e-19	2.54823e-17	yellow-e	yellow-e	-	-	-	-	GO:0005576//extracellular region	-	-	--
FBgn0033979	4346	3618	4377	1406	1950	1739	146.531	122.327	159.568	43.454	60.748	59.845	142.809	54.6823	-1.38494	5.48469e-19	3.06016e-17	Cyp6a19	Cyp6a19	-	-	-	-	GO:0005789//endoplasmic reticulum membrane;GO:0016020//membrane	GO:0004497//monooxygenase activity;GO:0005506//iron ion binding;GO:0016705//oxidoreductase activity, acting on paired donors, with incorporation or reduction of molecular oxygen;GO:0020037//heme binding	-	--
FBgn0036663	2794	3031	2447	7322	6954	5388	22.639	24.574	21.261	54.028	51.58	44.34	22.8247	49.9827	1.13083	5.49181e-19	3.06016e-17	CG9674	NP_001246804.1 uncharacterized protein Dmel_CG9674, isoform F [Drosophila melanogaster]	Metabolism;Metabolism;Metabolism;Metabolism	Global and overview maps;Global and overview maps;Amino acid metabolism;Energy metabolism	ko01100//Metabolic pathways;ko01230//Biosynthesis of amino acids;ko00250//Alanine, aspartate and glutamate metabolism;ko00910//Nitrogen metabolism	K00264;K00264;K00264;K00264	-	GO:0005506//iron ion binding;GO:0010181//FMN binding;GO:0015930//glutamate synthase activity;GO:0016040//glutamate synthase (NADH) activity;GO:0016491//oxidoreductase activity;GO:0016638//oxidoreductase activity, acting on the CH-NH2 group of donors;GO:0016639//oxidoreductase activity, acting on the CH-NH2 group of donors, NAD or NADP as acceptor;GO:0050660//flavin adenine dinucleotide binding;GO…	GO:0006537//glutamate biosynthetic process;GO:0006807//nitrogen compound metabolic process;GO:0019676//ammonia assimilation cycle;GO:0097054//L-glutamate biosynthetic process	--
FBgn0034292	738	787	682	2447	1798	1666	49.642	53.209	49.827	150.726	111.734	114.213	50.8927	125.558	1.30282	7.1644e-19	3.95833e-17	CG5767	NP_611283.1 uncharacterized protein Dmel_CG5767 [Drosophila melanogaster]	-	-	-	-	-	-	-	--
FBgn0085265	214	151	199	581	567	595	18.979	13.304	19.167	46.755	46.219	53.76	17.15	48.9113	1.51196	7.39396e-19	4.06792e-17	CG34236	NP_001097303.2 uncharacterized protein Dmel_CG34236, isoform B [Drosophila melanogaster]	-	-	-	-	-	-	-	--
FBgn0031252	845	733	885	304	265	336	39.82	34.719	45.298	13.118	11.537	16.137	39.9457	13.5973	-1.55472	8.46868e-19	4.63963e-17	CG13690	NP_608521.1 uncharacterized protein Dmel_CG13690 [Drosophila melanogaster]	Genetic Information Processing	Replication and repair	ko03030//DNA replication	K10743	GO:0032299//ribonuclease H2 complex	GO:0003676//nucleic acid binding;GO:0003723//RNA binding;GO:0004523//RNA-DNA hybrid ribonuclease activity;GO:0046872//metal ion binding	GO:0006298//mismatch repair;GO:0016070//RNA metabolic process;GO:0043137//DNA replication, removal of RNA primer	--
FBgn0046876	213	201	206	620	607	524	13.58	12.881	14.265	36.198	35.753	34.049	13.5753	35.3333	1.38004	9.17473e-19	4.98455e-17	Obp83ef	Odorant-binding protein 83ef	-	-	-	-	GO:0005576//extracellular region	GO:0005549//odorant binding	GO:0007606//sensory perception of chemical stimulus;GO:0007608//sensory perception of smell	--
FBgn0029688	677	621	606	1941	1748	1327	4.274	3.917	4.193	11.295	10.241	8.603	4.128	10.0463	1.28315	9.80393e-19	5.30429e-17	lva	lava lamp	-	-	-	-	GO:0000137//Golgi cis cisterna;GO:0005776//autophagosome;GO:0005794//Golgi apparatus;GO:0005815//microtubule organizing center;GO:0031410//cytoplasmic vesicle	GO:0008017//microtubule binding;GO:0030507//spectrin binding	GO:0000070//mitotic sister chromatid segregation;GO:0007349//cellularization;GO:0050775//positive regulation of dendrite morphogenesis;GO:0051683//establishment of Golgi localization	--
FBgn0052695	738	832	1027	2372	2232	1930	100.929	115.618	152.338	294.086	277.995	271.535	122.962	281.205	1.19342	1.0691e-18	5.7603e-17	CG32695	NP_001285064.1 uncharacterized protein Dmel_CG32695, isoform B [Drosophila melanogaster]	-	-	-	-	-	-	-	--
FBgn0027550	367	301	267	1069	889	799	8.168	6.734	6.454	21.787	18.28	18.124	7.11867	19.397	1.44615	1.14226e-18	6.12921e-17	CG6495	NP_609451.1 uncharacterized protein Dmel_CG6495 [Drosophila melanogaster]	-	-	-	-	GO:0016021//integral component of membrane	GO:0005515//protein binding	-	--
FBgn0051157	136	143	125	417	449	410	5.919	6.255	5.91	16.62	18.058	18.181	6.028	17.6197	1.54744	1.27368e-18	6.7237e-17	CG31157	NP_001097769.2 uncharacterized protein Dmel_CG31157, isoform C [Drosophila melanogaster]	-	-	-	-	GO:0016021//integral component of membrane	-	-	--
FBgn0035101	436	428	361	1166	1115	915	7.557	7.308	6.556	18.058	17.583	15.993	7.14033	17.2113	1.2693	1.3896e-18	7.30607e-17	p130CAS	p130CAS	-	-	-	-	GO:0005737//cytoplasm;GO:0005925//focal adhesion	GO:0005515//protein binding	GO:0007015//actin filament organization;GO:0007169//transmembrane receptor protein tyrosine kinase signaling pathway;GO:0007414//axonal defasciculation;GO:0016477//cell migration;GO:0030011//maintenance of cell polarity;GO:0090527//actin filament reorganization;GO:0098609//cell-cell adhesion	--
FBgn0262579	955	822	978	2763	2587	1873	10.83	9.309	12.009	28.754	27.121	21.822	10.716	25.899	1.27313	1.7796e-18	9.31896e-17	Sarm	Sterile alpha and Armadillo motif	-	-	-	-	GO:0005737//cytoplasm;GO:0030424//axon;GO:0030425//dendrite;GO:0043005//neuron projection;GO:0043025//neuronal cell body	GO:0003953//NAD+ nucleosidase activity;GO:0005515//protein binding;GO:0035591//signaling adaptor activity;GO:0050135//NAD(P)+ nucleosidase activity;GO:0061809//NAD+ nucleotidase, cyclic ADP-ribose generating	GO:0007165//signal transduction;GO:0019677//NAD catabolic process;GO:0034128//negative regulation of MyD88-independent toll-like receptor signaling pathway;GO:0045087//innate immune response;GO:0048678//response to axon injury;GO:1901214//regulation of neuron death	--
FBgn0041775	17408	15288	14642	7799	8568	7631	313.515	277.081	286.867	126.69	141.827	139.598	292.488	136.038	-1.10436	2.05966e-18	1.07424e-16	tral	trailer hitch	-	-	-	-	GO:0000932//P-body;GO:0005829//cytosol;GO:0043186//P granule;GO:0045169//fusome;GO:0071598//neuronal ribonucleoprotein granule;GO:1990124//messenger ribonucleoprotein complex	GO:0003729//mRNA binding;GO:0017151//DEAD/H-box RNA helicase binding	GO:0000226//microtubule cytoskeleton organization;GO:0006397//mRNA processing;GO:0007029//endoplasmic reticulum organization;GO:0010529//negative regulation of transposition;GO:0030036//actin cytoskeleton organization;GO:0033962//P-body assembly;GO:0034063//stress granule assembly;GO:0070863//positive regulation of protein exit from endoplasmic reticulum;GO:2000017//positive regulation of determi…	--
FBgn0020415	4879	5727	6950	13474	13166	12637	194.58	229.63	301.135	492.172	485.204	513.654	241.782	497.01	1.03957	2.71972e-18	1.41285e-16	Idgf2	Imaginal disc growth factor 2	Metabolism;Metabolism	Global and overview maps;Carbohydrate metabolism	ko01100//Metabolic pathways;ko00520//Amino sugar and nucleotide sugar metabolism	K01183;K01183	GO:0005576//extracellular region;GO:0005615//extracellular space	GO:0004568//chitinase activity;GO:0008061//chitin binding;GO:0008084//imaginal disc growth factor receptor binding	GO:0005975//carbohydrate metabolic process;GO:0006032//chitin catabolic process;GO:0007444//imaginal disc development;GO:0008284//positive regulation of cell population proliferation;GO:0043066//negative regulation of apoptotic process	--
FBgn0030347	1162	1134	945	2503	2259	2292	46.418	44.655	40.001	89.812	82.891	92.292	43.6913	88.3317	1.01558	2.7313e-18	1.41323e-16	CG15739	NP_001259467.1 uncharacterized protein Dmel_CG15739, isoform B [Drosophila melanogaster]	Metabolism	Metabolism of terpenoids and polyketides	ko00981//Insect hormone biosynthesis	K21013	GO:0005737//cytoplasm	GO:0016791//phosphatase activity	GO:0016311//dephosphorylation	--
FBgn0017577	5749	5033	4454	1903	2419	2325	134.686	118.514	113.336	40.825	52.356	55.514	122.179	49.565	-1.3016	2.79821e-18	1.44213e-16	Mcm5	Minichromosome maintenance 5	Genetic Information Processing	Replication and repair	ko03030//DNA replication	K02209	GO:0005634//nucleus;GO:0005829//cytosol;GO:0042555//MCM complex;GO:0071162//CMG complex	GO:0003677//DNA binding;GO:0003678//DNA helicase activity;GO:0003688//DNA replication origin binding;GO:0003697//single-stranded DNA binding;GO:0005524//ATP binding	GO:0000712//resolution of meiotic recombination intermediates;GO:0000727//double-strand break repair via break-induced replication;GO:0006260//DNA replication;GO:0006267//pre-replicative complex assembly involved in nuclear cell cycle DNA replication;GO:0006270//DNA replication initiation;GO:0030261//chromosome condensation;GO:0032508//DNA duplex unwinding;GO:0042023//DNA endoreduplication;GO:005…	--
FBgn0041709	5409	5207	4509	1169	2229	1439	231.19	223.693	209.324	45.754	88.017	62.684	221.402	65.485	-1.75743	2.81099e-18	1.44301e-16	yellow-g	yellow-g	-	-	-	-	GO:0005576//extracellular region	GO:0016853//isomerase activity	-	--
FBgn0033968	126	136	122	485	447	365	9.734	10.504	10.235	34.183	31.724	28.43	10.1577	31.4457	1.63029	2.84346e-18	1.45396e-16	hui	hase und igel	-	-	-	-	-	-	GO:0035220//wing disc development	--
FBgn0038631	188	235	293	789	813	658	15.584	19.579	26.38	59.89	62.26	55.589	20.5143	59.2463	1.53009	2.89718e-18	1.47272e-16	CG7695	NP_650733.1 uncharacterized protein Dmel_CG7695 [Drosophila melanogaster]	-	-	-	-	-	GO:0005515//protein binding	-	--
FBgn0034538	380	407	550	1436	1167	1163	29.712	30.706	46.089	102.451	82.824	92.173	35.5023	92.4827	1.38127	2.90274e-18	1.47272e-16	CG16799	NP_001286641.1 uncharacterized protein Dmel_CG16799, isoform B [Drosophila melanogaster]	-	-	-	-	GO:0005615//extracellular space	GO:0003796//lysozyme activity	GO:0008152//metabolic process;GO:0050829//defense response to Gram-negative bacterium	--
FBgn0053926	1356	1157	1524	2939	2984	2883	98.852	84.776	120.669	196.194	200.968	214.198	101.432	203.787	1.00654	3.1824e-18	1.60835e-16	CG33926	NP_001027118.1 uncharacterized protein Dmel_CG33926, isoform A [Drosophila melanogaster]	-	-	-	-	-	-	-	--
FBgn0085320	23	7	20	232	167	141	4.948	1.514	4.674	45.708	33.194	30.918	3.712	36.6067	3.30184	3.20531e-18	1.61367e-16	CG34291	NP_001097938.1 uncharacterized protein Dmel_CG34291 [Drosophila melanogaster]	-	-	-	-	-	-	-	--
FBgn0063923	177	187	250	771	678	560	17.933	18.991	26.717	70.843	62.94	57.809	21.2137	63.864	1.59001	3.2904e-18	1.65013e-16	Kaz1-ORFB	Kaz1-ORFB	-	-	-	-	GO:0005576//extracellular region;GO:0005739//mitochondrion	GO:0004867//serine-type endopeptidase inhibitor activity;GO:0005515//protein binding;GO:0008233//peptidase activity	-	--
FBgn0015926	1680	1368	1479	478	648	637	41.005	33.559	39.226	10.695	14.618	15.85	37.93	13.721	-1.46695	3.4065e-18	1.70181e-16	dah	discontinuous actin hexagon	-	-	-	-	GO:0005886//plasma membrane;GO:0019898//extrinsic component of membrane;GO:0045202//synapse	GO:0008270//zinc ion binding	GO:0007349//cellularization;GO:0099536//synaptic signaling	--
FBgn0034140	742	1174	1297	3606	3110	2853	40.115	64.945	77.663	181.162	156.845	159.635	60.9077	165.881	1.44545	3.45179e-18	1.71786e-16	Lst	Limostatin	-	-	-	-	-	-	GO:0009267//cellular response to starvation;GO:0042593//glucose homeostasis;GO:0050848//regulation of calcium-mediated signaling;GO:0070328//triglyceride homeostasis;GO:0071322//cellular response to carbohydrate stimulus;GO:0090278//negative regulation of peptide hormone secretion	--
FBgn0000147	1632	1399	1266	470	608	597	59.448	51.221	50.089	15.678	20.461	22.164	53.586	19.4343	-1.46325	3.65824e-18	1.81368e-16	aurA	aurora A	Cellular Processes;Organismal Systems	Cell growth and death;Endocrine system	ko04114//Oocyte meiosis;ko04914//Progesterone-mediated oocyte maturation	K11481;K11481	GO:0005737//cytoplasm;GO:0005813//centrosome;GO:0005876//spindle microtubule;GO:0031616//spindle pole centrosome;GO:0032133//chromosome passenger complex;GO:0051233//spindle midzone	GO:0004672//protein kinase activity;GO:0004674//protein serine/threonine kinase activity;GO:0004712//protein serine/threonine/tyrosine kinase activity;GO:0005524//ATP binding;GO:0035174//histone serine kinase activity	GO:0006468//protein phosphorylation;GO:0007052//mitotic spindle organization;GO:0007098//centrosome cycle;GO:0007100//mitotic centrosome separation;GO:0007279//pole cell formation;GO:0018105//peptidyl-serine phosphorylation;GO:0032465//regulation of cytokinesis;GO:0045167//asymmetric protein localization involved in cell fate determination;GO:0045739//positive regulation of DNA repair;GO:0050767/…	--
FBgn0033134	740	750	710	1721	1622	1445	40.028	40.776	41.713	85.245	81.055	79.66	40.839	81.9867	1.00544	3.78572e-18	1.86977e-16	Tsp42El	Tetraspanin 42El	-	-	-	-	GO:0005887//integral component of plasma membrane;GO:0016021//integral component of membrane	-	-	--
FBgn0051832	49	54	73	277	276	249	3.694	4.092	5.977	19.122	19.222	19.131	4.58767	19.1583	2.06214	3.83919e-18	1.88903e-16	CG31832	NP_723894.2 uncharacterized protein Dmel_CG31832 [Drosophila melanogaster]	-	-	-	-	GO:0005615//extracellular space;GO:0062023//collagen-containing extracellular matrix	GO:0030297//transmembrane receptor protein tyrosine kinase activator activity	GO:0043066//negative regulation of apoptotic process	--
FBgn0264494	1528	2003	1796	4661	4539	3545	26.86	35.333	33.905	74.54	72.623	62.444	32.0327	69.869	1.12511	3.94341e-18	1.93301e-16	CG17646	NP_608618.1 uncharacterized protein Dmel_CG17646, isoform A [Drosophila melanogaster]	Environmental Information Processing;Human Diseases	Membrane transport;Cardiovascular disease	ko02010//ABC transporters;ko05417//Lipid and atherosclerosis	K05679;K05679	GO:0005886//plasma membrane;GO:0016020//membrane;GO:0016021//integral component of membrane	GO:0005524//ATP binding;GO:0016887//ATP hydrolysis activity;GO:0140359//ABC-type transporter activity	GO:0006641//triglyceride metabolic process	--
FBgn0038795	480	381	533	1309	1139	1152	23.016	18.363	27.759	57.477	50.457	56.298	23.046	54.744	1.24818	5.2952e-18	2.57627e-16	CG4335	NP_650886.1 uncharacterized protein Dmel_CG4335 [Drosophila melanogaster]	Metabolism;Metabolism	Global and overview maps;Amino acid metabolism	ko01100//Metabolic pathways;ko00310//Lysine degradation	K00471;K00471	GO:0005739//mitochondrion	GO:0005506//iron ion binding;GO:0016491//oxidoreductase activity;GO:0050353//trimethyllysine dioxygenase activity	GO:0045329//carnitine biosynthetic process	--
FBgn0005633	214	404	386	69	44	62	11.936	22.67	23.428	3.531	2.203	3.504	19.3447	3.07933	-2.65125	5.40182e-18	2.61838e-16	fln	flightin	-	-	-	-	GO:0005863//striated muscle myosin thick filament;GO:0031672//A band	GO:0008307//structural constituent of muscle;GO:0097493//structural molecule activity conferring elasticity	GO:0007527//adult somatic muscle development;GO:0014703//oscillatory muscle contraction;GO:0030241//skeletal muscle myosin thick filament assembly;GO:0045214//sarcomere organization;GO:0071688//striated muscle myosin thick filament assembly	--
FBgn0040636	447	397	366	1157	1058	897	26.841	23.922	24.155	63.625	59.227	55.041	24.9727	59.2977	1.24763	5.70554e-18	2.75535e-16	CG13255	NP_001262129.1 uncharacterized protein Dmel_CG13255, isoform B [Drosophila melanogaster]	-	-	-	-	GO:0016021//integral component of membrane	-	-	--
FBgn0085261	224	233	282	819	727	611	18.029	18.723	24.312	60.29	53.847	49.665	20.3547	54.6007	1.42356	6.31861e-18	3.02898e-16	CG34232	NP_001097283.1 uncharacterized protein Dmel_CG34232, isoform B [Drosophila melanogaster]	-	-	-	-	-	-	-	--
FBgn0086711	398	434	464	139	141	144	10.22	11.232	13.015	3.257	3.343	3.84	11.489	3.48	-1.72309	6.47726e-18	3.09366e-16	mol	moladietz	-	-	-	-	GO:0005789//endoplasmic reticulum membrane;GO:0005886//plasma membrane;GO:0016020//membrane;GO:0016021//integral component of membrane;GO:0045178//basal part of cell	-	GO:0006979//response to oxidative stress;GO:0007616//long-term memory;GO:0008104//protein localization;GO:0015031//protein transport	--
FBgn0267727	11965	10079	9609	4754	5563	4914	266.716	225.823	232.65	97.041	114.564	111.64	241.73	107.748	-1.16573	8.08183e-18	3.84595e-16	Pen	Pendulin	Genetic Information Processing;Human Diseases;Human Diseases	Translation;Infectious disease: viral;Cancer: overview	ko03013//Nucleocytoplasmic transport;ko05164//Influenza A;ko05207//Chemical carcinogenesis - receptor activation	K15043;K15043;K15043	GO:0005634//nucleus;GO:0005654//nucleoplasm;GO:0005737//cytoplasm;GO:0042025//host cell nucleus	GO:0005515//protein binding;GO:0008139//nuclear localization sequence binding;GO:0061608//nuclear import signal receptor activity	GO:0006606//protein import into nucleus;GO:0006607//NLS-bearing protein import into nucleus;GO:0007291//sperm individualization;GO:0007301//female germline ring canal formation;GO:0042332//gravitaxis;GO:0048542//lymph gland development	--
FBgn0085244	403	359	565	1444	1258	1153	52.14	46.685	79.397	171.079	150.367	152.035	59.4073	157.827	1.40963	1.05009e-17	4.97897e-16	CG34215	ABY21751.1 LP20105p, partial [Drosophila melanogaster]	-	-	-	-	GO:0005576//extracellular region	-	-	--
FBgn0003961	1078	1395	1005	3397	2677	2664	49.069	63.823	49.687	141.595	112.575	123.587	54.193	125.919	1.21632	1.1436e-17	5.40268e-16	Uro	Urate oxidase	Metabolism;Metabolism;Metabolism	Global and overview maps;Nucleotide metabolism;Biosynthesis of other secondary metabolites	ko01100//Metabolic pathways;ko00230//Purine metabolism;ko00232//Caffeine metabolism	K00365;K00365;K00365	GO:0005777//peroxisome	GO:0004846//urate oxidase activity	GO:0006144//purine nucleobase metabolic process;GO:0019428//allantoin biosynthetic process;GO:0019628//urate catabolic process	--
FBgn0038525	40	59	52	245	269	214	2.083	3.088	2.941	11.684	12.943	11.359	2.704	11.9953	2.14931	1.41791e-17	6.60289e-16	CG14329	NP_650636.2 uncharacterized protein Dmel_CG14329 [Drosophila melanogaster]	-	-	-	-	-	-	-	--
FBgn0030747	1489	1363	1076	3012	3070	2816	18.048	16.519	14.161	33.247	34.338	34.812	16.2427	34.1323	1.07135	1.70063e-17	7.86332e-16	CG4301	NP_573125.1 uncharacterized protein Dmel_CG4301, isoform A [Drosophila melanogaster]	-	-	-	-	GO:0005783//endoplasmic reticulum;GO:0005802//trans-Golgi network;GO:0005886//plasma membrane;GO:0016021//integral component of membrane	GO:0000166//nucleotide binding;GO:0000287//magnesium ion binding;GO:0005215//transporter activity;GO:0005524//ATP binding;GO:0016887//ATP hydrolysis activity;GO:0140326//ATPase-coupled intramembrane lipid transporter activity	GO:0015914//phospholipid transport;GO:0045332//phospholipid translocation	--
FBgn0263316	298	309	299	832	765	679	3.622	3.775	3.947	9.261	8.591	8.412	3.78133	8.75467	1.21116	1.89373e-17	8.7252e-16	Mrp4	Multidrug resistance protein 4	Environmental Information Processing	Membrane transport	ko02010//ABC transporters	K05673	GO:0016020//membrane;GO:0016021//integral component of membrane	GO:0005524//ATP binding;GO:0016887//ATP hydrolysis activity;GO:0042626//ATPase-coupled transmembrane transporter activity;GO:0140359//ABC-type transporter activity	GO:0001666//response to hypoxia;GO:0006979//response to oxidative stress;GO:0008340//determination of adult lifespan;GO:0034059//response to anoxia;GO:0048190//wing disc dorsal/ventral pattern formation;GO:0055085//transmembrane transport	--
FBgn0087040	16639	15098	12589	5154	7028	6749	591.111	539.106	485.758	167.667	230.662	244.358	538.658	214.229	-1.33022	2.0581e-17	9.44913e-16	alphaTub67C	alpha-Tubulin at 67C	Cellular Processes	Transport and catabolism	ko04145//Phagosome	K07374	GO:0005634//nucleus;GO:0005737//cytoplasm;GO:0005874//microtubule;GO:0005886//plasma membrane;GO:0048471//perinuclear region of cytoplasm;GO:0055028//cortical microtubule	GO:0003924//GTPase activity;GO:0005200//structural constituent of cytoskeleton;GO:0005525//GTP binding	GO:0000226//microtubule cytoskeleton organization;GO:0000278//mitotic cell cycle;GO:0000280//nuclear division;GO:0007017//microtubule-based process;GO:0007052//mitotic spindle organization;GO:0007417//central nervous system development;GO:0007422//peripheral nervous system development;GO:0009792//embryo development ending in birth or egg hatching;GO:0035038//female pronucleus assembly;GO:0035044/…	--
FBgn0001112	200	222	189	603	588	508	3.963	4.421	4.068	10.942	10.764	10.259	4.15067	10.655	1.36012	2.5447e-17	1.16015e-15	Gld	Glucose dehydrogenase	Metabolism;Metabolism	Global and overview maps;Carbohydrate metabolism	ko01100//Metabolic pathways;ko00030//Pentose phosphate pathway	K00115;K00115	-	GO:0016614//oxidoreductase activity, acting on CH-OH group of donors;GO:0050660//flavin adenine dinucleotide binding	-	--
FBgn0039670	147	183	226	612	590	534	10.967	13.722	18.313	41.809	40.665	40.602	14.334	41.0253	1.51707	2.59282e-17	1.17797e-15	CG7567	NP_651699.1 uncharacterized protein Dmel_CG7567 [Drosophila melanogaster]	-	-	-	-	-	-	-	--
FBgn0037447	461	475	396	1026	1058	986	10.264	10.63	9.577	20.919	21.763	22.375	10.157	21.6857	1.09427	2.76051e-17	1.2494e-15	Neurochondrin	Neurochondrin	-	-	-	-	GO:0030425//dendrite;GO:0043025//neuronal cell body	-	GO:0003012//muscle system process	--
FBgn0016684	778	816	922	2200	1874	1698	22.166	23.777	29.029	58.257	50.3	49.97	24.9907	52.8423	1.0803	2.76919e-17	1.2494e-15	NaPi-T	Na[+]-dependent inorganic phosphate cotransporter	-	-	-	-	GO:0016021//integral component of membrane	GO:0015114//phosphate ion transmembrane transporter activity;GO:0022857//transmembrane transporter activity	GO:0006814//sodium ion transport;GO:0006820//anion transport;GO:0035435//phosphate ion transmembrane transport;GO:0055085//transmembrane transport	--
FBgn0002526	355	385	437	1485	1240	874	1.744	1.902	2.332	6.682	5.629	4.377	1.99267	5.56267	1.48108	2.90721e-17	1.30714e-15	LanA	Laminin A	Environmental Information Processing	Signaling molecules and interaction	ko04512//ECM-receptor interaction	K06240	-	GO:0005102//signaling receptor binding	GO:0007155//cell adhesion;GO:0030155//regulation of cell adhesion;GO:0030334//regulation of cell migration;GO:0045995//regulation of embryonic development	--
FBgn0027556	135	115	196	577	510	490	2.659	2.195	4.146	10.048	8.751	9.433	3	9.41067	1.64933	3.22186e-17	1.44364e-15	CG4928	XP_015046384.1 UNC93-like protein [Drosophila yakuba]	-	-	-	-	GO:0005886//plasma membrane;GO:0016021//integral component of membrane;GO:0055120//striated muscle dense body	GO:0015459//potassium channel regulator activity	GO:0006937//regulation of muscle contraction;GO:0043266//regulation of potassium ion transport	--
FBgn0004629	748	801	1051	2362	2060	1949	88.779	95.555	135.486	256.713	225.879	235.757	106.607	239.45	1.16742	3.85784e-17	1.72268e-15	Cys	Cystatin-like	-	-	-	-	GO:0005615//extracellular space	GO:0004869//cysteine-type endopeptidase inhibitor activity	GO:0032504//multicellular organism reproduction	--
FBgn0085313	510	510	460	1126	1044	1081	56.34	56.628	55.194	113.906	106.549	121.708	56.054	114.054	1.02483	4.13546e-17	1.84035e-15	CG34284	NP_001097832.1 uncharacterized protein Dmel_CG34284 [Drosophila melanogaster]	-	-	-	-	-	-	-	--
FBgn0036996	4566	6461	7133	2603	2478	2298	177.585	252.571	301.322	92.706	89.038	91.089	243.826	90.9443	-1.4228	4.16479e-17	1.8471e-15	mag	magro	Metabolism;Metabolism;Organismal Systems	Global and overview maps;Lipid metabolism;Digestive system	ko01100//Metabolic pathways;ko00561//Glycerolipid metabolism;ko04975//Fat digestion and absorption	K14452;K14452;K14452	GO:0031410//cytoplasmic vesicle	GO:0004771//sterol esterase activity;GO:0016788//hydrolase activity, acting on ester bonds	GO:0006629//lipid metabolic process;GO:0016042//lipid catabolic process;GO:0042632//cholesterol homeostasis;GO:0070328//triglyceride homeostasis	--
FBgn0011230	1018	1045	1119	3199	2932	2032	3.619	3.734	4.321	10.415	9.614	7.363	3.89133	9.13067	1.23046	5.09386e-17	2.24388e-15	poe	purity of essence	Human Diseases;Human Diseases	Cancer: overview;Infectious disease: viral	ko05203//Viral carcinogenesis;ko05165//Human papillomavirus infection	K10691;K10691	GO:0005654//nucleoplasm;GO:0005813//centrosome;GO:0005829//cytosol;GO:0043186//P granule	GO:0004842//ubiquitin-protein transferase activity;GO:0005515//protein binding;GO:0005516//calmodulin binding;GO:0008270//zinc ion binding;GO:0061630//ubiquitin protein ligase activity	GO:0006511//ubiquitin-dependent protein catabolic process;GO:0007291//sperm individualization;GO:0007601//visual perception;GO:0032436//positive regulation of proteasomal ubiquitin-dependent protein catabolic process;GO:0042065//glial cell growth;GO:0042066//perineurial glial growth;GO:0050896//response to stimulus;GO:0070373//negative regulation of ERK1 and ERK2 cascade	--
FBgn0003358	4134	5453	4757	2242	2251	2387	261.827	347.13	327.239	130.029	131.711	154.079	312.065	138.606	-1.17085	6.24421e-17	2.74135e-15	Jon99Ci	Jonah 99Ci	-	-	-	-	-	GO:0004175//endopeptidase activity;GO:0004252//serine-type endopeptidase activity	GO:0006508//proteolysis	--
FBgn0259791	1929	1726	1362	452	670	656	55.35	49.778	42.447	11.876	17.761	19.184	49.1917	16.2737	-1.59587	6.92131e-17	3.02842e-15	bora	aurora borealis	-	-	-	-	GO:0005634//nucleus;GO:0005737//cytoplasm	GO:0019901//protein kinase binding	GO:0007049//cell cycle;GO:0007088//regulation of mitotic nuclear division;GO:0032147//activation of protein kinase activity;GO:0045167//asymmetric protein localization involved in cell fate determination;GO:0051301//cell division;GO:0060236//regulation of mitotic spindle organization	--
FBgn0001086	3452	3221	2863	1310	1613	1559	99.349	93.174	89.495	34.524	42.887	45.728	94.006	41.0463	-1.1955	7.30148e-17	3.18408e-15	fzy	fizzy	Genetic Information Processing	Folding, sorting and degradation	ko04120//Ubiquitin mediated proteolysis	K03363	GO:0000776//kinetochore;GO:0005680//anaphase-promoting complex;GO:0005737//cytoplasm;GO:0005813//centrosome;GO:0005819//spindle	GO:0005515//protein binding;GO:0010997//anaphase-promoting complex binding;GO:0097027//ubiquitin-protein transferase activator activity;GO:1990757//ubiquitin ligase activator activity	GO:0000278//mitotic cell cycle;GO:0007096//regulation of exit from mitosis;GO:0007144//female meiosis I;GO:0007147//female meiosis II;GO:0030162//regulation of proteolysis;GO:0030163//protein catabolic process;GO:0030718//germ-line stem cell population maintenance;GO:0031145//anaphase-promoting complex-dependent catabolic process;GO:0060547//negative regulation of necrotic cell death;GO:0097150//…	--
FBgn0028518	540	522	618	1507	1308	1161	13.498	13.179	16.718	34.397	30.228	29.608	14.465	31.411	1.1187	9.26248e-17	4.01241e-15	CG18480	NP_001285960.1 uncharacterized protein Dmel_CG18480, isoform B [Drosophila melanogaster]	-	-	-	-	GO:0016021//integral component of membrane	GO:0005515//protein binding	-	--
FBgn0035328	4563	4203	4363	758	1560	1629	183.173	169.584	190.232	27.864	57.855	66.647	180.996	50.7887	-1.83338	9.5927e-17	4.1417e-15	yellow-g2	yellow-g2	-	-	-	-	GO:0005576//extracellular region	GO:0016853//isomerase activity	-	--
FBgn0261278	4500	3836	3801	1854	2168	1983	111.26	94.745	101.771	42.565	49.592	50.821	102.592	47.6593	-1.10609	1.13777e-16	4.88005e-15	grp	grapes	Cellular Processes;Human Diseases;Cellular Processes;Human Diseases;Human Diseases;Cellular Processes	Cell growth and death;Infectious disease: viral;Cell growth and death;Cancer: overview;Infectious disease: viral;Cell growth and death	ko04110//Cell cycle;ko05166//Human T-cell leukemia virus 1 infection;ko04218//Cellular senescence;ko05203//Viral carcinogenesis;ko05170//Human immunodeficiency virus 1 infection;ko04115//p53 signaling pathway	K02216;K02216;K02216;K02216;K02216;K02216	GO:0005634//nucleus;GO:0005737//cytoplasm;GO:0005829//cytosol	GO:0004672//protein kinase activity;GO:0004674//protein serine/threonine kinase activity;GO:0005524//ATP binding	GO:0000077//DNA damage checkpoint signaling;GO:0001700//embryonic development via the syncytial blastoderm;GO:0006468//protein phosphorylation;GO:0007093//mitotic cell cycle checkpoint signaling;GO:0007348//regulation of syncytial blastoderm mitotic cell cycle;GO:0007349//cellularization;GO:0007444//imaginal disc development;GO:0009314//response to radiation;GO:0033314//mitotic DNA replication ch…	--
FBgn0032810	301	306	284	956	835	654	18.767	19.696	20.19	57.779	50.708	43.502	19.551	50.663	1.37369	1.17895e-16	5.04009e-15	CG13077	NP_609990.1 uncharacterized protein Dmel_CG13077, isoform A [Drosophila melanogaster]	-	-	-	-	GO:0016021//integral component of membrane	GO:0016491//oxidoreductase activity;GO:0020037//heme binding;GO:0140575//transmembrane monodehydroascorbate reductase activity	-	--
FBgn0038897	423	365	445	988	945	917	7.976	6.912	9.113	17.067	16.466	17.635	8.00033	17.056	1.09215	1.22875e-16	5.23583e-15	CG5849	NP_650979.1 uncharacterized protein Dmel_CG5849, isoform A [Drosophila melanogaster]	-	-	-	-	GO:0005737//cytoplasm	GO:0008237//metallopeptidase activity;GO:0008270//zinc ion binding;GO:0042277//peptide binding;GO:0070006//metalloaminopeptidase activity	GO:0006508//proteolysis;GO:0043171//peptide catabolic process	--
FBgn0043362	41	57	55	298	218	218	0.194	0.271	0.282	1.29	0.952	1.05	0.249	1.09733	2.13978	1.23464e-16	5.24381e-15	bchs	blue cheese	-	-	-	-	GO:0005737//cytoplasm;GO:0005764//lysosome;GO:0031594//neuromuscular junction;GO:0048786//presynaptic active zone	GO:0005515//protein binding;GO:0046872//metal ion binding	GO:0001578//microtubule bundle formation;GO:0007420//brain development;GO:0022416//chaeta development;GO:0031396//regulation of protein ubiquitination;GO:0032418//lysosome localization;GO:0046622//positive regulation of organ growth;GO:0048666//neuron development;GO:0048749//compound eye development;GO:0050807//regulation of synapse organization;GO:0097156//fasciculation of motor neuron axon	--
FBgn0030794	1061	1057	963	463	484	469	30.069	30.108	29.642	12.015	12.672	13.546	29.9397	12.7443	-1.2322	1.28578e-16	5.44329e-15	CG13005	NP_573168.1 uncharacterized protein Dmel_CG13005 [Drosophila melanogaster]	-	-	-	-	-	-	-	--
FBgn0029733	4257	3720	2909	1022	1591	1386	130.912	114.982	97.164	28.78	45.201	43.439	114.353	39.14	-1.54677	1.33921e-16	5.6511e-15	CG6927	NP_572194.1 uncharacterized protein Dmel_CG6927 [Drosophila melanogaster]	-	-	-	-	GO:0005887//integral component of plasma membrane;GO:0016021//integral component of membrane;GO:0043005//neuron projection;GO:0045202//synapse	GO:0004888//transmembrane signaling receptor activity;GO:0005216//ion channel activity;GO:0005230//extracellular ligand-gated ion channel activity;GO:0030594//neurotransmitter receptor activity	GO:0006811//ion transport;GO:0007165//signal transduction;GO:0007268//chemical synaptic transmission;GO:0034220//ion transmembrane transport;GO:0042391//regulation of membrane potential;GO:0050877//nervous system process;GO:1902476//chloride transmembrane transport	--
FBgn0063493	546	457	503	1263	1250	1025	41	34.492	41.025	86.847	86.717	78.444	38.839	84.0027	1.11293	1.36521e-16	5.74225e-15	GstE7	Glutathione S transferase E7	Metabolism;Metabolism;Metabolism;Metabolism;Metabolism	Global and overview maps;Xenobiotics biodegradation and metabolism;Metabolism of other amino acids;Xenobiotics biodegradation and metabolism;Xenobiotics biodegradation and metabolism	ko01100//Metabolic pathways;ko00983//Drug metabolism - other enzymes;ko00480//Glutathione metabolism;ko00980//Metabolism of xenobiotics by cytochrome P450;ko00982//Drug metabolism - cytochrome P450	K00799;K00799;K00799;K00799;K00799	GO:0005737//cytoplasm	GO:0004364//glutathione transferase activity	GO:0006749//glutathione metabolic process	--
FBgn0033296	18597	24791	18652	9947	9934	9808	547.135	731.175	594.885	266.77	270.017	292.883	624.398	276.557	-1.17489	1.39828e-16	5.86242e-15	Mal-A7	Maltase A7	Metabolism;Metabolism;Metabolism	Global and overview maps;Carbohydrate metabolism;Carbohydrate metabolism	ko01100//Metabolic pathways;ko00052//Galactose metabolism;ko00500//Starch and sucrose metabolism	K01187;K01187;K01187	-	GO:0032450//maltose alpha-glucosidase activity	GO:0005975//carbohydrate metabolic process	--
FBgn0033659	629	629	519	1346	1270	1284	37.44	37.55	33.368	71.903	68.922	77.083	36.1193	72.636	1.00791	1.44583e-16	6.04238e-15	Damm	Death associated molecule related to Mch2 caspase	-	-	-	-	GO:0005737//cytoplasm	GO:0004197//cysteine-type endopeptidase activity;GO:0008234//cysteine-type peptidase activity;GO:0097153//cysteine-type endopeptidase activity involved in apoptotic process;GO:0097200//cysteine-type endopeptidase activity involved in execution phase of apoptosis	GO:0006508//proteolysis;GO:0006915//apoptotic process;GO:0012501//programmed cell death	--
FBgn0010382	2517	1828	1580	600	797	734	40.432	29.42	27.488	8.77	11.755	12.002	32.4467	10.8423	-1.5814	1.46141e-16	6.08797e-15	CycE	Cyclin E	Environmental Information Processing	Signal transduction	ko04391//Hippo signaling pathway - fly	K06626	GO:0000307//cyclin-dependent protein kinase holoenzyme complex;GO:0005634//nucleus;GO:0005737//cytoplasm;GO:0005813//centrosome;GO:0042025//host cell nucleus;GO:0097134//cyclin E1-CDK2 complex	GO:0016538//cyclin-dependent protein serine/threonine kinase regulator activity;GO:0016740//transferase activity	GO:0000079//regulation of cyclin-dependent protein serine/threonine kinase activity;GO:0000082//G1/S transition of mitotic cell cycle;GO:0001932//regulation of protein phosphorylation;GO:0006275//regulation of DNA replication;GO:0007096//regulation of exit from mitosis;GO:0007277//pole cell development;GO:0007307//eggshell chorion gene amplification;GO:0007400//neuroblast fate determination;GO:00…	--
FBgn0036023	721	1132	840	282	280	343	47.607	75.126	60.242	17.051	17.08	23.082	60.9917	19.071	-1.67723	1.64242e-16	6.77705e-15	CG18179	NP_648340.1 uncharacterized protein Dmel_CG18179 [Drosophila melanogaster]	Organismal Systems;Organismal Systems	Digestive system;Digestive system	ko04974//Protein digestion and absorption;ko04972//Pancreatic secretion	K01310;K01310	-	GO:0004252//serine-type endopeptidase activity	GO:0006508//proteolysis	--
FBgn0053192	38	37	11	239	189	234	7.967	7.797	2.505	45.884	36.607	49.999	6.08967	44.1633	2.85841	1.6909e-16	6.95511e-15	MtnD	Metallothionein D	-	-	-	-	-	GO:0046872//metal ion binding	GO:0010038//response to metal ion;GO:0046688//response to copper ion;GO:0055065//metal ion homeostasis	--
FBgn0026403	546	391	353	1249	1169	1076	6.707	4.86	4.776	13.674	13.114	13.503	5.44767	13.4303	1.30178	1.88228e-16	7.71794e-15	Ndg	Nidogen/entactin	-	-	-	-	GO:0005604//basement membrane	GO:0005201//extracellular matrix structural constituent;GO:0005509//calcium ion binding	GO:0007160//cell-matrix adhesion;GO:0071711//basement membrane organization;GO:0110011//regulation of basement membrane organization;GO:2001197//basement membrane assembly involved in embryonic body morphogenesis	--
FBgn0001230	584	367	299	8513	5266	3630	15.037	9.498	8.362	200.722	125.267	95.259	10.9657	140.416	3.67864	2.47415e-16	1.0113e-14	Hsp68	Heat shock protein 68	Genetic Information Processing;Cellular Processes;Genetic Information Processing;Organismal Systems	Folding, sorting and degradation;Transport and catabolism;Transcription;Aging	ko04141//Protein processing in endoplasmic reticulum;ko04144//Endocytosis;ko03040//Spliceosome;ko04213//Longevity regulating pathway - multiple species	K03283;K03283;K03283;K03283	GO:0005634//nucleus;GO:0005737//cytoplasm;GO:0005739//mitochondrion;GO:0005829//cytosol;GO:0005886//plasma membrane	GO:0005524//ATP binding;GO:0016887//ATP hydrolysis activity;GO:0031072//heat shock protein binding;GO:0044183//protein folding chaperone;GO:0051082//unfolded protein binding;GO:0051787//misfolded protein binding;GO:0140662//ATP-dependent protein folding chaperone	GO:0006457//protein folding;GO:0006986//response to unfolded protein;GO:0008340//determination of adult lifespan;GO:0016192//vesicle-mediated transport;GO:0034620//cellular response to unfolded protein;GO:0042026//protein refolding;GO:0042594//response to starvation;GO:0051085//chaperone cofactor-dependent protein refolding	--
FBgn0000615	5172	4485	3629	1756	1853	2162	146.983	128.019	111.731	44.984	48.033	62.311	128.911	51.776	-1.31602	2.52845e-16	1.03027e-14	exu	exuperantia	-	-	-	-	GO:0000932//P-body;GO:0005737//cytoplasm;GO:0036464//cytoplasmic ribonucleoprotein granule;GO:0071011//precatalytic spliceosome	GO:0003676//nucleic acid binding;GO:0003723//RNA binding;GO:0003727//single-stranded RNA binding;GO:0042803//protein homodimerization activity	GO:0000398//mRNA splicing, via spliceosome;GO:0001700//embryonic development via the syncytial blastoderm;GO:0007283//spermatogenesis;GO:0007300//ovarian nurse cell to oocyte transport;GO:0007317//regulation of pole plasm oskar mRNA localization;GO:0008595//anterior/posterior axis specification, embryo;GO:0045450//bicoid mRNA localization;GO:0045451//pole plasm oskar mRNA localization;GO:0090305/…	--
FBgn0039473	22	21	25	150	209	128	1.159	1.112	1.431	7.239	10.176	6.875	1.234	8.09667	2.71399	2.72543e-16	1.10707e-14	CG17191	NP_651523.1 uncharacterized protein Dmel_CG17191 [Drosophila melanogaster]	-	-	-	-	GO:0005615//extracellular space	GO:0004806//triglyceride lipase activity;GO:0008970//phospholipase A1 activity;GO:0016298//lipase activity	GO:0006629//lipid metabolic process;GO:0016042//lipid catabolic process	--
FBgn0034329	562	251	413	4131	3103	2663	89.429	40.145	71.381	601.95	456.172	431.879	66.985	496.667	2.89037	2.88148e-16	1.16682e-14	BomS1	Bomanin Short 1	Organismal Systems	Immune system	ko04624//Toll and Imd signaling pathway	K20695	GO:0005576//extracellular region	-	GO:0006952//defense response;GO:0009617//response to bacterium;GO:0045087//innate immune response	--
FBgn0033443	799	614	464	1857	1733	1578	19.986	15.53	12.462	42.912	40.463	40.669	15.9927	41.348	1.37041	2.9624e-16	1.19587e-14	CG1698	NP_001260835.1 uncharacterized protein Dmel_CG1698, isoform B [Drosophila melanogaster]	Organismal Systems	Nervous system	ko04721//Synaptic vesicle cycle	K05038	GO:0005886//plasma membrane;GO:0016021//integral component of membrane	GO:0005283//amino acid:sodium symporter activity;GO:0005326//neurotransmitter transmembrane transporter activity;GO:0005416//amino acid:cation symporter activity;GO:0015179//L-amino acid transmembrane transporter activity	GO:0003333//amino acid transmembrane transport;GO:0006836//neurotransmitter transport	--
FBgn0260474	776	864	825	2260	1719	1686	28.358	31.734	32.739	75.625	58.045	62.782	30.9437	65.484	1.0815	3.26449e-16	1.31375e-14	CG30002	NP_001163100.1 uncharacterized protein Dmel_CG30002 [Drosophila melanogaster]	-	-	-	-	-	GO:0004252//serine-type endopeptidase activity	GO:0006508//proteolysis	--
FBgn0037515	825	809	655	1749	1769	1538	33.227	32.301	28.509	64.272	65.587	63.06	31.3457	64.3063	1.03669	3.39151e-16	1.36067e-14	Sp7	Serine protease 7	-	-	-	-	GO:0005576//extracellular region;GO:0005615//extracellular space	GO:0004252//serine-type endopeptidase activity;GO:0046872//metal ion binding	GO:0006508//proteolysis;GO:0035006//melanization defense response;GO:0035008//positive regulation of melanization defense response	--
FBgn0053532	1423	939	962	3306	2662	2658	128.126	84.979	94.079	272.581	221.433	243.911	102.395	245.975	1.26437	3.92051e-16	1.56808e-14	lectin-37Da	lectin-37Da	-	-	-	-	GO:0005576//extracellular region	GO:0005534//galactose binding;GO:0046872//metal ion binding	GO:0016339//calcium-dependent cell-cell adhesion via plasma membrane cell adhesion molecules	--
FBgn0087021	703	648	687	225	266	300	41.719	38.651	44.281	12.227	14.583	18.144	41.5503	14.9847	-1.47137	3.97865e-16	1.58647e-14	Spc25	Spc25	-	-	-	-	GO:0000776//kinetochore;GO:0005634//nucleus;GO:0031262//Ndc80 complex	-	GO:0000212//meiotic spindle organization;GO:0007059//chromosome segregation;GO:0007080//mitotic metaphase plate congression;GO:0051301//cell division;GO:0051311//meiotic metaphase plate congression	--
FBgn0014469	1999	2227	2867	5551	5273	4915	64.35	72.01	100.298	163.745	156.899	161.36	78.886	160.668	1.02624	4.66593e-16	1.83804e-14	Cyp4e2	Cytochrome P450-4e2	-	-	-	-	GO:0005789//endoplasmic reticulum membrane;GO:0012505//endomembrane system;GO:0016020//membrane	GO:0004497//monooxygenase activity;GO:0005506//iron ion binding;GO:0016705//oxidoreductase activity, acting on paired donors, with incorporation or reduction of molecular oxygen;GO:0020037//heme binding	-	--
FBgn0041184	548	507	303	1488	1328	1248	8.987	8.357	5.397	22.345	20.21	20.939	7.58033	21.1647	1.48132	4.96915e-16	1.95159e-14	Socs36E	Suppressor of cytokine signaling at 36E	Organismal Systems;Environmental Information Processing	Endocrine system;Signal transduction	ko04917//Prolactin signaling pathway;ko04630//JAK-STAT signaling pathway	K04698;K04698	GO:0005942//phosphatidylinositol 3-kinase complex	GO:0005118//sevenless binding;GO:0005126//cytokine receptor binding;GO:0046935//1-phosphatidylinositol-3-kinase regulator activity	GO:0007298//border follicle cell migration;GO:0007482//haltere development;GO:0007616//long-term memory;GO:0008586//imaginal disc-derived wing vein morphogenesis;GO:0009968//negative regulation of signal transduction;GO:0030718//germ-line stem cell population maintenance;GO:0035556//intracellular signal transduction;GO:0040008//regulation of growth;GO:0042059//negative regulation of epidermal gro…	--
FBgn0037126	739	523	508	1651	1369	1483	58.554	41.651	43.718	119.79	100.212	119.757	47.9743	113.253	1.23921	5.47822e-16	2.13226e-14	CG14567	NP_649357.1 uncharacterized protein Dmel_CG14567 [Drosophila melanogaster]	-	-	-	-	-	-	-	--
FBgn0022981	3418	2922	2813	1279	1626	1367	77.977	67.002	69.703	26.719	34.268	31.784	71.5607	30.9237	-1.21046	6.30913e-16	2.44836e-14	rpk	ripped pocket	-	-	-	-	GO:0016020//membrane;GO:0016021//integral component of membrane;GO:0030424//axon;GO:0030425//dendrite;GO:0043025//neuronal cell body	GO:0005272//sodium channel activity	GO:0006814//sodium ion transport;GO:0050966//detection of mechanical stimulus involved in sensory perception of pain;GO:0050975//sensory perception of touch	--
FBgn0002542	4823	3985	3517	1569	2010	1867	78.198	64.941	61.936	23.295	30.108	30.851	68.3583	28.0847	-1.28333	6.66991e-16	2.58068e-14	lds	lodestar	Organismal Systems	Endocrine system	ko04918//Thyroid hormone synthesis	K15173	GO:0005634//nucleus;GO:0005737//cytoplasm	GO:0003677//DNA binding;GO:0004386//helicase activity;GO:0005524//ATP binding;GO:0008094//ATP-dependent activity, acting on DNA;GO:0140658//ATP-dependent chromatin remodeler activity	GO:0006353//DNA-templated transcription, termination;GO:0007143//female meiotic nuclear division;GO:0007283//spermatogenesis;GO:0034454//microtubule anchoring at centrosome	--
FBgn0031435	1048	916	947	408	471	385	40.323	35.424	39.576	14.375	16.742	15.097	38.441	15.4047	-1.31928	6.92581e-16	2.67176e-14	Elba2	Early boundary activity 2	-	-	-	-	GO:0005634//nucleus;GO:0005677//chromatin silencing complex;GO:0005704//polytene chromosome band	GO:0003677//DNA binding;GO:0003682//chromatin binding;GO:0043565//sequence-specific DNA binding	GO:0006325//chromatin organization;GO:0045892//negative regulation of transcription, DNA-templated	--
FBgn0000166	822	678	719	251	317	304	18.92	15.896	17.995	5.277	6.805	7.412	17.6037	6.498	-1.43781	7.3021e-16	2.80862e-14	bcd	bicoid	-	-	-	-	GO:0005634//nucleus	GO:0000978//RNA polymerase II cis-regulatory region sequence-specific DNA binding;GO:0000981//DNA-binding transcription factor activity, RNA polymerase II-specific;GO:0003677//DNA binding;GO:0003700//DNA-binding transcription factor activity;GO:0003730//mRNA 3'-UTR binding;GO:0030371//translation repressor activity	GO:0006355//regulation of transcription, DNA-templated;GO:0007355//anterior region determination;GO:0007367//segment polarity determination;GO:0008293//torso signaling pathway;GO:0008358//maternal determination of anterior/posterior axis, embryo;GO:0008595//anterior/posterior axis specification, embryo;GO:0009948//anterior/posterior axis specification;GO:0017148//negative regulation of translatio…	Homeobox
FBgn0085408	457	449	388	1091	987	905	8.704	8.923	7.859	18.773	17.096	17.642	8.49533	17.837	1.07013	7.52012e-16	2.88397e-14	Shrm	Shroom	-	-	-	-	GO:0005737//cytoplasm;GO:0005856//cytoskeleton;GO:0005874//microtubule;GO:0005886//plasma membrane;GO:0005912//adherens junction;GO:0005923//bicellular tight junction;GO:0016324//apical plasma membrane;GO:0030864//cortical actin cytoskeleton;GO:0043296//apical junction complex	GO:0003779//actin binding;GO:0019900//kinase binding;GO:0042803//protein homodimerization activity;GO:0051015//actin filament binding	GO:0000902//cell morphogenesis;GO:0003383//apical constriction;GO:0007015//actin filament organization;GO:0016477//cell migration;GO:0030036//actin cytoskeleton organization;GO:0030950//establishment or maintenance of actin cytoskeleton polarity;GO:0031032//actomyosin structure organization;GO:0031532//actin cytoskeleton reorganization;GO:0032438//melanosome organization;GO:0042249//establishment…	--
FBgn0004362	4246	3993	4380	2227	2433	2174	232.372	219.305	258.197	105.869	118.79	118.591	236.625	114.417	-1.0483	8.12852e-16	3.10814e-14	HmgD	High mobility group protein D	-	-	-	-	GO:0005634//nucleus;GO:0005694//chromosome;GO:0005737//cytoplasm	GO:0003677//DNA binding;GO:0003680//minor groove of adenine-thymine-rich DNA binding;GO:0003682//chromatin binding;GO:0008134//transcription factor binding;GO:0008301//DNA binding, bending	GO:0006310//DNA recombination;GO:0006325//chromatin organization;GO:0006338//chromatin remodeling;GO:0006355//regulation of transcription, DNA-templated;GO:0006357//regulation of transcription by RNA polymerase II;GO:0045089//positive regulation of innate immune response;GO:0045944//positive regulation of transcription by RNA polymerase II	HMG
FBgn0031971	441	328	418	1164	1114	855	38.707	28.624	39.787	94.15	90.643	76.955	35.706	87.2493	1.28898	8.97676e-16	3.42246e-14	Sirup	Starvation-upregulated protein	-	-	-	-	GO:0005739//mitochondrion;GO:0005749//mitochondrial respiratory chain complex II, succinate dehydrogenase complex (ubiquinone);GO:0005759//mitochondrial matrix	-	GO:0034553//mitochondrial respiratory chain complex II assembly;GO:0034614//cellular response to reactive oxygen species;GO:0045333//cellular respiration	--
FBgn0034290	581	467	615	1260	1346	1189	63.678	52.171	72.946	127.774	137.864	134.788	62.9317	133.475	1.08472	9.67139e-16	3.67654e-14	CG5773	NP_001286557.1 uncharacterized protein Dmel_CG5773, isoform B [Drosophila melanogaster]	-	-	-	-	-	-	-	--
FBgn0030500	1448	1423	1244	577	680	657	37.809	37.346	35.281	13.796	16.404	17.484	36.812	15.8947	-1.21163	1.01847e-15	3.84924e-14	Ndc80	Ndc80	-	-	-	-	GO:0000776//kinetochore;GO:0031262//Ndc80 complex	-	GO:0007059//chromosome segregation;GO:0007080//mitotic metaphase plate congression;GO:0051301//cell division;GO:0051315//attachment of mitotic spindle microtubules to kinetochore	--
FBgn0262160	85	64	78	378	293	247	0.58	0.454	0.595	2.395	1.823	1.68	0.543	1.966	1.85624	1.0697e-15	4.03116e-14	CG9932	NP_609599.1 uncharacterized protein Dmel_CG9932, isoform A [Drosophila melanogaster]	-	-	-	-	GO:0005634//nucleus	GO:0000978//RNA polymerase II cis-regulatory region sequence-specific DNA binding;GO:0001227//DNA-binding transcription repressor activity, RNA polymerase II-specific	GO:0000122//negative regulation of transcription by RNA polymerase II;GO:0010468//regulation of gene expression	--
FBgn0022893	4011	3624	4331	2021	2200	2064	150.554	136.878	176.471	69.439	76.259	78.887	154.634	74.8617	-1.04656	1.27824e-15	4.78935e-14	Df31	Decondensation factor 31	-	-	-	-	GO:0000785//chromatin;GO:0005634//nucleus;GO:0005737//cytoplasm	GO:0042393//histone binding	GO:0006325//chromatin organization;GO:0006334//nucleosome assembly	--
FBgn0033603	47	83	64	373	343	220	1.247	2.214	1.817	8.998	8.298	5.925	1.75933	7.74033	2.13737	1.31044e-15	4.89595e-14	Cpr47Ef	Cuticular protein 47Ef	-	-	-	-	GO:0062129//chitin-based extracellular matrix	GO:0008010//structural constituent of chitin-based larval cuticle	GO:0040003//chitin-based cuticle development	--
FBgn0037750	929	804	659	1888	1798	1709	28.601	24.487	21.515	52.98	50.426	53.305	24.8677	52.237	1.0708	1.39613e-15	5.20117e-14	Whamy	WHAMM and JMY related	-	-	-	-	GO:0005634//nucleus;GO:0030027//lamellipodium;GO:0055037//recycling endosome	GO:0003779//actin binding;GO:0051020//GTPase binding	GO:0001578//microtubule bundle formation;GO:0007520//myoblast fusion;GO:0016477//cell migration;GO:0030838//positive regulation of actin filament polymerization;GO:0051127//positive regulation of actin nucleation	--
FBgn0031248	517	563	526	1254	1285	1030	33.072	36.199	36.547	73.457	75.942	67.152	35.2727	72.1837	1.03312	1.43411e-15	5.32745e-14	CG11912	AAL28245.2 GH13929p, partial [Drosophila melanogaster]	Organismal Systems;Organismal Systems	Digestive system;Digestive system	ko04974//Protein digestion and absorption;ko04972//Pancreatic secretion	K01310;K01310	-	GO:0004252//serine-type endopeptidase activity	GO:0006508//proteolysis	--
FBgn0033592	4	5	9	111	83	101	0.37	0.465	0.904	9.403	7.093	9.522	0.579667	8.67267	3.90318	1.48103e-15	5.48614e-14	CG13215	NP_610649.1 uncharacterized protein Dmel_CG13215 [Drosophila melanogaster]	-	-	-	-	-	-	-	--
FBgn0266405	28	21	6	195	150	162	6.333	4.774	1.474	40.384	31.341	37.34	4.19367	36.355	3.11587	1.54431e-15	5.70433e-14	CG45045	NP_001369022.1 uncharacterized protein Dmel_CG45045 [Drosophila melanogaster]	-	-	-	-	-	-	-	--
FBgn0015035	902	873	1248	2296	2777	2232	28.707	27.926	43.14	66.913	81.649	72.396	33.2577	73.6527	1.14705	1.6315e-15	6.00934e-14	Cyp4e3	Cytochrome P450-4e3	-	-	-	-	GO:0005783//endoplasmic reticulum;GO:0005789//endoplasmic reticulum membrane;GO:0016020//membrane	GO:0004497//monooxygenase activity;GO:0005506//iron ion binding;GO:0016705//oxidoreductase activity, acting on paired donors, with incorporation or reduction of molecular oxygen;GO:0020037//heme binding	-	--
FBgn0039251	634	612	587	207	245	268	22.86	21.679	23.106	6.575	7.862	10.538	22.5483	8.325	-1.4375	1.88793e-15	6.91481e-14	Trf4-2	Topoisomerase related function 4-2	Genetic Information Processing	Folding, sorting and degradation	ko03018//RNA degradation	K03514	GO:0005730//nucleolus;GO:0031499//TRAMP complex	GO:0004652//polynucleotide adenylyltransferase activity;GO:0016779//nucleotidyltransferase activity;GO:0046872//metal ion binding	GO:0043631//RNA polyadenylation;GO:0071044//histone mRNA catabolic process;GO:0071046//nuclear polyadenylation-dependent ncRNA catabolic process;GO:0071050//sno(s)RNA polyadenylation	--
FBgn0083972	40	34	53	252	217	173	3.255	2.781	4.684	18.776	16.312	14.346	3.57333	16.478	2.2052	1.95314e-15	7.13361e-14	CG34136	NP_001036371.1 uncharacterized protein Dmel_CG34136 [Drosophila melanogaster]	-	-	-	-	-	-	-	--
FBgn0033890	2325	1983	1634	748	900	893	45.182	38.733	34.489	13.311	16.158	17.687	39.468	15.7187	-1.3282	2.13304e-15	7.7598e-14	Ctf4	Chromosome transmission fidelity 4	-	-	-	-	GO:0031298//replication fork protection complex;GO:0043596//nuclear replication fork	GO:0003682//chromatin binding;GO:0005515//protein binding	GO:0000278//mitotic cell cycle;GO:0006261//DNA-dependent DNA replication;GO:0006281//DNA repair;GO:0006974//cellular response to DNA damage stimulus;GO:0035185//preblastoderm mitotic cell cycle;GO:0042023//DNA endoreduplication	--
FBgn0266717	749	582	718	2215	1908	1361	2.806	2.181	2.912	7.579	6.597	5.186	2.633	6.454	1.29349	2.19454e-15	7.94849e-14	Bruce	BIR repeat containing ubiquitin-conjugating enzyme	Genetic Information Processing;Cellular Processes;Cellular Processes	Folding, sorting and degradation;Cell growth and death;Cell growth and death	ko04120//Ubiquitin mediated proteolysis;ko04214//Apoptosis - fly;ko04215//Apoptosis - multiple species	K10586;K10586;K10586	GO:0005634//nucleus	GO:0004842//ubiquitin-protein transferase activity;GO:0004869//cysteine-type endopeptidase inhibitor activity;GO:0061631//ubiquitin conjugating enzyme activity	GO:0000209//protein polyubiquitination;GO:0006511//ubiquitin-dependent protein catabolic process;GO:0006915//apoptotic process;GO:0007286//spermatid development;GO:0009267//cellular response to starvation;GO:0012501//programmed cell death;GO:0016242//negative regulation of macroautophagy;GO:0032465//regulation of cytokinesis;GO:0043066//negative regulation of apoptotic process;GO:0045849//negativ…	--
FBgn0032322	413	553	683	1734	1466	1309	31.733	42.758	57.281	121.433	104.42	102.353	43.924	109.402	1.31656	2.29005e-15	8.27145e-14	CG16743	NP_001260367.1 uncharacterized protein Dmel_CG16743, isoform B [Drosophila melanogaster]	-	-	-	-	-	-	-	--
FBgn0039316	163	139	262	1094	712	560	6.617	5.672	11.553	40.67	26.704	23.17	7.94733	30.1813	1.92511	2.31331e-15	8.33241e-14	CG11893	NP_651375.1 uncharacterized protein Dmel_CG11893 [Drosophila melanogaster]	-	-	-	-	-	-	-	--
FBgn0042180	766	677	610	279	292	247	21.598	19.264	18.746	7.155	7.652	7.112	19.8693	7.30633	-1.44332	2.33867e-15	8.40055e-14	CG18870	NP_001286684.1 uncharacterized protein Dmel_CG18870, isoform B [Drosophila melanogaster]	-	-	-	-	GO:0016021//integral component of membrane	-	-	--
FBgn0039678	1064	1175	866	458	439	407	107.983	120.156	95.319	42.837	41.365	42.297	107.819	42.1663	-1.35445	2.54508e-15	9.11683e-14	Obp99a	Odorant-binding protein 99a	-	-	-	-	GO:0005576//extracellular region;GO:0012505//endomembrane system	GO:0005549//odorant binding	GO:0007606//sensory perception of chemical stimulus;GO:0007608//sensory perception of smell;GO:0019236//response to pheromone;GO:0042048//olfactory behavior	--
FBgn0031848	730	604	550	175	232	247	46.386	38.559	37.712	9.988	13.534	16.211	40.8857	13.2443	-1.62622	2.66146e-15	9.50762e-14	Nse1	Non-SMC element 1	-	-	-	-	GO:0005634//nucleus;GO:0030915//Smc5-Smc6 complex	GO:0004842//ubiquitin-protein transferase activity;GO:0008270//zinc ion binding;GO:0061630//ubiquitin protein ligase activity	GO:0000724//double-strand break repair via homologous recombination;GO:0006281//DNA repair;GO:0006301//postreplication repair;GO:0016567//protein ubiquitination;GO:2001022//positive regulation of response to DNA damage stimulus	--
FBgn0033130	384	479	562	1112	1204	1119	19.081	23.735	29.828	49.204	53.789	56.671	24.2147	53.2213	1.13612	2.8199e-15	1.00187e-13	Tsp42Ei	Tetraspanin 42Ei	-	-	-	-	GO:0005887//integral component of plasma membrane;GO:0016021//integral component of membrane	-	-	--
FBgn0024227	1162	1225	1065	452	557	548	56.425	59.788	56.17	20.099	24.988	27.12	57.461	24.069	-1.25541	2.85373e-15	1.01113e-13	aurB	aurora B	-	-	-	-	GO:0000775//chromosome, centromeric region;GO:0000776//kinetochore;GO:0005737//cytoplasm;GO:0005819//spindle;GO:0005876//spindle microtubule;GO:0030496//midbody;GO:0031616//spindle pole centrosome;GO:0032133//chromosome passenger complex;GO:0051233//spindle midzone;GO:1990385//meiotic spindle midzone	GO:0004672//protein kinase activity;GO:0004674//protein serine/threonine kinase activity;GO:0004712//protein serine/threonine/tyrosine kinase activity;GO:0005524//ATP binding;GO:0035174//histone serine kinase activity;GO:0044022//histone kinase activity (H3-S28 specific);GO:0046872//metal ion binding	GO:0000070//mitotic sister chromatid segregation;GO:0000281//mitotic cytokinesis;GO:0006325//chromatin organization;GO:0006468//protein phosphorylation;GO:0007052//mitotic spindle organization;GO:0007076//mitotic chromosome condensation;GO:0007094//mitotic spindle assembly checkpoint signaling;GO:0016572//histone phosphorylation;GO:0030261//chromosome condensation;GO:0032465//regulation of cytoki…	--
FBgn0002525	2522	2231	2087	1200	1163	1092	46.273	41.129	41.563	20.108	19.676	20.375	42.9883	20.053	-1.10013	3.23589e-15	1.14034e-13	Lam	Lamin	Cellular Processes	Cell growth and death	ko04214//Apoptosis - fly	K07611	GO:0000922//spindle pole;GO:0005634//nucleus;GO:0005635//nuclear envelope;GO:0005637//nuclear inner membrane;GO:0005638//lamin filament;GO:0005641//nuclear envelope lumen;GO:0005652//nuclear lamina;GO:0005737//cytoplasm;GO:0005882//intermediate filament	GO:0003682//chromatin binding;GO:0005102//signaling receptor binding;GO:0005200//structural constituent of cytoskeleton	GO:0001745//compound eye morphogenesis;GO:0006997//nucleus organization;GO:0006998//nuclear envelope organization;GO:0007084//mitotic nuclear membrane reassembly;GO:0007097//nuclear migration;GO:0007110//meiosis I cytokinesis;GO:0007112//male meiosis cytokinesis;GO:0007283//spermatogenesis;GO:0007417//central nervous system development;GO:0007430//terminal branching, open tracheal system;GO:00075…	--
FBgn0034293	250	248	282	636	608	615	16.706	16.532	20.487	38.103	36.599	41.468	17.9083	38.7233	1.11257	3.32081e-15	1.16712e-13	CG14495	NP_001286560.2 uncharacterized protein Dmel_CG14495, isoform D [Drosophila melanogaster]	-	-	-	-	-	-	-	--
FBgn0261113	841	689	984	2916	2506	1689	16.091	13.033	21.854	50.747	45.05	33.655	16.9927	43.1507	1.34447	3.3501e-15	1.17425e-13	Xrp1	Xrp1	-	-	-	-	GO:0005634//nucleus	GO:0003682//chromatin binding	GO:0008285//negative regulation of cell population proliferation;GO:0009987//cellular process;GO:0051276//chromosome organization	--
FBgn0259676	1420	1283	1204	492	633	613	46.533	42.258	42.853	14.764	19.164	20.473	43.8813	18.1337	-1.27494	3.41629e-15	1.19104e-13	DNApol-alpha60	DNA polymerase alpha 60kD subunit	Genetic Information Processing	Replication and repair	ko03030//DNA replication	K02685	GO:0005658//alpha DNA polymerase:primase complex	GO:0003677//DNA binding;GO:0046872//metal ion binding;GO:0051539//4 iron, 4 sulfur cluster binding	GO:0000278//mitotic cell cycle;GO:0001745//compound eye morphogenesis;GO:0006260//DNA replication;GO:0006261//DNA-dependent DNA replication;GO:0006269//DNA replication, synthesis of RNA primer	--
FBgn0036449	753	765	791	1871	1777	1399	18.646	19.03	21.23	42.595	40.788	35.431	19.6353	39.6047	1.01222	3.5054e-15	1.21885e-13	bmm	brummer	-	-	-	-	GO:0005737//cytoplasm;GO:0005811//lipid droplet;GO:0005829//cytosol;GO:0016020//membrane	GO:0004806//triglyceride lipase activity;GO:0016787//hydrolase activity	GO:0006629//lipid metabolic process;GO:0006642//triglyceride mobilization;GO:0010884//positive regulation of lipid storage;GO:0010891//negative regulation of sequestering of triglyceride;GO:0016042//lipid catabolic process;GO:0019433//triglyceride catabolic process;GO:0055088//lipid homeostasis;GO:0070328//triglyceride homeostasis	--
FBgn0043791	20	27	45	226	175	171	0.617	0.837	1.508	6.385	4.988	5.377	0.987333	5.58333	2.49952	3.51964e-15	1.22055e-13	phu	phurba tashi	Metabolism;Metabolism;Metabolism	Global and overview maps;Metabolism of cofactors and vitamins;Metabolism of cofactors and vitamins	ko01100//Metabolic pathways;ko00790//Folate biosynthesis;ko00730//Thiamine metabolism	K01077;K01077;K01077	GO:0009986//cell surface	GO:0004035//alkaline phosphatase activity;GO:0016791//phosphatase activity	GO:0001666//response to hypoxia;GO:0016311//dephosphorylation;GO:0035094//response to nicotine	--
FBgn0031769	1617	1272	1306	614	683	610	46.086	35.896	39.676	15.131	16.839	17.908	40.5527	16.626	-1.28636	4.39307e-15	1.50555e-13	CG9135	NP_001285655.1 uncharacterized protein Dmel_CG9135, isoform C [Drosophila melanogaster]	-	-	-	-	-	-	GO:0034260//negative regulation of GTPase activity	--
FBgn0039818	308	269	230	681	700	637	6.401	5.619	5.192	12.96	13.44	13.493	5.73733	13.2977	1.21272	4.39921e-15	1.50555e-13	CG11318	NP_651842.3 uncharacterized protein Dmel_CG11318 [Drosophila melanogaster]	-	-	-	-	GO:0005887//integral component of plasma membrane;GO:0016021//integral component of membrane	GO:0004888//transmembrane signaling receptor activity;GO:0004930//G protein-coupled receptor activity	GO:0007166//cell surface receptor signaling pathway;GO:0007186//G protein-coupled receptor signaling pathway;GO:0007189//adenylate cyclase-activating G protein-coupled receptor signaling pathway	--
FBgn0030086	17365	15094	13491	7801	8308	8087	470.312	410.892	396.864	193.474	207.879	223.226	426.023	208.193	-1.03301	4.41763e-15	1.50789e-13	CCT2	Chaperonin containing TCP1 subunit 2	-	-	-	-	GO:0005737//cytoplasm;GO:0005829//cytosol;GO:0005832//chaperonin-containing T-complex	GO:0005524//ATP binding;GO:0016887//ATP hydrolysis activity;GO:0051082//unfolded protein binding;GO:0140662//ATP-dependent protein folding chaperone	GO:0006457//protein folding	--
FBgn0034085	336	252	262	882	845	629	4.206	3.171	3.562	10.11	9.772	8.025	3.64633	9.30233	1.35115	4.446e-15	1.51361e-13	Ptp52F	Protein tyrosine phosphatase 52F	-	-	-	-	GO:0005886//plasma membrane;GO:0005887//integral component of plasma membrane	GO:0004725//protein tyrosine phosphatase activity;GO:0005001//transmembrane receptor protein tyrosine phosphatase activity;GO:0005515//protein binding;GO:0016791//phosphatase activity	GO:0006470//protein dephosphorylation;GO:0007399//nervous system development;GO:0007411//axon guidance;GO:0008045//motor neuron axon guidance;GO:0016311//dephosphorylation;GO:0035075//response to ecdysone;GO:0035096//larval midgut cell programmed cell death;GO:0035335//peptidyl-tyrosine dephosphorylation	--
FBgn0004429	1561	1466	2173	4373	4043	3642	145.807	137.633	220.457	374.039	348.885	346.707	167.966	356.544	1.08591	4.47956e-15	1.52107e-13	LysP	Lysozyme P	Organismal Systems	Digestive system	ko04970//Salivary secretion	K13915	GO:0005615//extracellular space	GO:0003796//lysozyme activity	GO:0008152//metabolic process;GO:0019835//cytolysis;GO:0050829//defense response to Gram-negative bacterium	--
FBgn0039085	105	108	154	475	386	368	3.419	3.535	5.447	14.165	11.613	12.214	4.13367	12.664	1.61524	4.51737e-15	1.52992e-13	Ugt303B3	UDP-glycosyltransferase family 303 member B3	-	-	-	-	GO:0016021//integral component of membrane;GO:0043231//intracellular membrane-bounded organelle	GO:0008194//UDP-glycosyltransferase activity;GO:0015020//glucuronosyltransferase activity	-	--
FBgn0000182	3188	2710	2473	1103	1471	1168	47.23	40.397	39.799	15.045	20.177	17.648	42.4753	17.6233	-1.26914	4.98945e-15	1.67674e-13	BicC	Bicaudal C	-	-	-	-	GO:0005737//cytoplasm	GO:0003676//nucleic acid binding;GO:0003723//RNA binding;GO:0003729//mRNA binding;GO:0005515//protein binding	GO:0000226//microtubule cytoskeleton organization;GO:0000278//mitotic cell cycle;GO:0007275//multicellular organism development;GO:0007297//ovarian follicle cell migration;GO:0007319//negative regulation of oskar mRNA translation;GO:0008104//protein localization;GO:0030036//actin cytoskeleton organization;GO:0048477//oogenesis	--
FBgn0030484	2147	2935	3234	6589	6206	5764	101.094	138.903	165.394	284.101	269.964	276.606	135.13	276.89	1.03496	5.24895e-15	1.75941e-13	GstT4	Glutathione S transferase T4	Metabolism;Metabolism;Metabolism;Metabolism;Metabolism	Global and overview maps;Xenobiotics biodegradation and metabolism;Metabolism of other amino acids;Xenobiotics biodegradation and metabolism;Xenobiotics biodegradation and metabolism	ko01100//Metabolic pathways;ko00983//Drug metabolism - other enzymes;ko00480//Glutathione metabolism;ko00980//Metabolism of xenobiotics by cytochrome P450;ko00982//Drug metabolism - cytochrome P450	K00799;K00799;K00799;K00799;K00799	GO:0005737//cytoplasm	GO:0004364//glutathione transferase activity;GO:0004602//glutathione peroxidase activity	GO:0006749//glutathione metabolic process	--
FBgn0030551	5572	5184	4061	1871	2492	2255	273.108	255.389	216.194	83.977	112.843	112.646	248.23	103.155	-1.26686	5.95209e-15	1.98998e-13	CG11674	NP_572948.1 uncharacterized protein Dmel_CG11674 [Drosophila melanogaster]	-	-	-	-	-	-	-	--
FBgn0031483	2091	1801	1971	806	1024	971	62.883	54.721	65.083	22.579	28.881	29.968	60.8957	27.1427	-1.16578	5.99733e-15	1.99998e-13	CG9641	NP_608731.1 uncharacterized protein Dmel_CG9641, isoform A [Drosophila melanogaster]	-	-	-	-	-	-	-	--
FBgn0034151	269	428	388	102	85	109	11.905	19.039	18.651	4.134	3.475	4.916	16.5317	4.175	-1.98538	6.24591e-15	2.07756e-13	CG15617	NP_611151.1 uncharacterized protein Dmel_CG15617 [Drosophila melanogaster]	-	-	-	-	-	GO:0005515//protein binding	-	--
FBgn0053196	39	29	52	295	257	152	0.051	0.041	0.088	0.384	0.343	0.25	0.06	0.325667	2.44036	6.57914e-15	2.1773e-13	dpy	dumpy	-	-	-	-	GO:0005634//nucleus;GO:0016021//integral component of membrane;GO:0031012//extracellular matrix;GO:0042995//cell projection	GO:0003700//DNA-binding transcription factor activity;GO:0005201//extracellular matrix structural constituent;GO:0005509//calcium ion binding;GO:0008270//zinc ion binding	GO:0007424//open tracheal system development;GO:0007475//apposition of dorsal and ventral imaginal disc-derived wing surfaces;GO:0008362//chitin-based embryonic cuticle biosynthetic process;GO:0040005//chitin-based cuticle attachment to epithelium;GO:0044719//regulation of imaginal disc-derived wing size	--
FBgn0038790	54	60	66	239	260	207	11.575	12.926	15.366	46.911	51.486	45.22	13.289	47.8723	1.84896	6.61073e-15	2.18221e-13	MtnC	Metallothionein C	-	-	-	-	-	GO:0046872//metal ion binding	GO:0010038//response to metal ion;GO:0055065//metal ion homeostasis	--
FBgn0031432	2109	2118	1756	930	1062	919	75.927	76.671	68.628	30.561	35.336	33.702	73.742	33.1997	-1.15132	7.14623e-15	2.3471e-13	Cyp309a1	Cyp309a1	-	-	-	-	GO:0005789//endoplasmic reticulum membrane	GO:0004497//monooxygenase activity;GO:0005506//iron ion binding;GO:0016705//oxidoreductase activity, acting on paired donors, with incorporation or reduction of molecular oxygen;GO:0020037//heme binding	-	--
FBgn0032219	153	130	116	482	370	384	7.218	6.132	5.974	20.807	16.073	18.392	6.44133	18.424	1.51616	7.35248e-15	2.40877e-13	CG4995	NP_609380.1 uncharacterized protein Dmel_CG4995, isoform A [Drosophila melanogaster]	Organismal Systems	Environmental adaptation	ko04714//Thermogenesis	K15109	GO:0016021//integral component of membrane	GO:0005347//ATP transmembrane transporter activity;GO:0015227//acyl carnitine transmembrane transporter activity	GO:0006844//acyl carnitine transport;GO:0006865//amino acid transport;GO:0055085//transmembrane transport	--
MSTRG.7056	24	12	30	273	335	92	4.918	2.456	6.811	52.072	64.364	19.481	4.72833	45.3057	3.26029	7.86998e-15	2.57185e-13	--	-	-	-	-	-	-	-	-	--
MSTRG.2249	47	37	78	246	287	239	2.101	1.685	3.804	10.078	11.873	10.937	2.53	10.9627	2.11539	7.91009e-15	2.57849e-13	--	IP07237p, partial [Drosophila melanogaster]	-	-	-	-	-	-	-	--
FBgn0037203	6973	7601	5769	3415	3593	3404	152.23	168.324	137.519	69.538	73.357	76.674	152.691	73.1897	-1.0609	8.65719e-15	2.81499e-13	slif	slimfast	-	-	-	-	GO:0005886//plasma membrane;GO:0005887//integral component of plasma membrane;GO:0016020//membrane	GO:0000064//L-ornithine transmembrane transporter activity;GO:0015171//amino acid transmembrane transporter activity;GO:0015174//basic amino acid transmembrane transporter activity;GO:0015181//arginine transmembrane transporter activity;GO:0015189//L-lysine transmembrane transporter activity;GO:0022857//transmembrane transporter activity	GO:0006865//amino acid transport;GO:0040008//regulation of growth;GO:0045824//negative regulation of innate immune response;GO:0050829//defense response to Gram-negative bacterium;GO:0055085//transmembrane transport;GO:0055088//lipid homeostasis;GO:0089718//amino acid import across plasma membrane;GO:0097638//L-arginine import across plasma membrane;GO:1903352//L-ornithine transmembrane transport	--
FBgn0035977	65	58	73	273	251	218	2.766	2.491	3.351	10.604	9.846	9.432	2.86933	9.96067	1.79553	9.01558e-15	2.92423e-13	PGRP-LF	Peptidoglycan recognition protein LF	Organismal Systems	Immune system	ko04624//Toll and Imd signaling pathway	K24077	GO:0005887//integral component of plasma membrane	GO:0005102//signaling receptor binding;GO:0008270//zinc ion binding;GO:0008745//N-acetylmuramoyl-L-alanine amidase activity	GO:0008340//determination of adult lifespan;GO:0009253//peptidoglycan catabolic process;GO:0009617//response to bacterium;GO:0019731//antibacterial humoral response;GO:0045087//innate immune response;GO:0050777//negative regulation of immune response;GO:0061060//negative regulation of peptidoglycan recognition protein signaling pathway;GO:0098542//defense response to other organism	--
FBgn0033027	197	266	380	61	48	67	14.093	18.621	29.107	3.921	3.122	5.021	20.607	4.02133	-2.35739	9.18913e-15	2.97313e-13	TpnC4	Troponin C isoform 4	-	-	-	-	-	GO:0005509//calcium ion binding;GO:0030234//enzyme regulator activity	GO:0000226//microtubule cytoskeleton organization;GO:0060361//flight	--
FBgn0051769	647	744	1035	2422	1990	1846	34.224	39.556	59.463	117.316	97.247	99.518	44.4143	104.694	1.23708	9.39123e-15	3.02351e-13	CG31769	NP_723866.2 uncharacterized protein Dmel_CG31769 [Drosophila melanogaster]	-	-	-	-	-	-	-	--
FBgn0266459	3188	2694	2462	1085	1471	1168	47.23	40.084	39.556	14.724	20.177	17.648	42.29	17.5163	-1.27162	1.0007e-14	3.20594e-13	CG45084	NP_001285973.1 uncharacterized protein Dmel_CG45084, isoform A [Drosophila melanogaster]	-	-	-	-	-	-	-	--
FBgn0035945	1459	1424	1224	652	704	618	32.262	31.651	28.859	12.359	13.572	13.793	30.924	13.2413	-1.22368	1.05928e-14	3.37701e-13	CG5026	NP_001163392.1 uncharacterized protein Dmel_CG5026, isoform C [Drosophila melanogaster]	-	-	-	-	GO:0005737//cytoplasm	GO:0004438//phosphatidylinositol-3-phosphatase activity	GO:0010507//negative regulation of autophagy;GO:0035335//peptidyl-tyrosine dephosphorylation;GO:0046856//phosphatidylinositol dephosphorylation	--
FBgn0042201	170	247	270	44	56	50	18.152	26.508	31.313	4.302	5.524	5.441	25.3243	5.089	-2.31507	1.09261e-14	3.47476e-13	Nplp3	Neuropeptide-like precursor 3	-	-	-	-	GO:0005576//extracellular region	GO:0005184//neuropeptide hormone activity	GO:0007218//neuropeptide signaling pathway	--
FBgn0034758	1246	853	828	2985	2495	2091	117.127	81.488	84.278	256.036	215.655	198.01	94.2977	223.234	1.24326	1.18766e-14	3.76785e-13	CG13510	NP_001246465.1 uncharacterized protein Dmel_CG13510, isoform B [Drosophila melanogaster]	Cellular Processes	Transport and catabolism	ko04142//Lysosome	K19363	GO:0005765//lysosomal membrane;GO:0010008//endosome membrane	GO:0046872//metal ion binding	GO:0009631//cold acclimation	zf-LITAF-like
FBgn0052407	301	353	367	869	812	717	18.087	21.32	23.952	47.776	45.077	43.865	21.1197	45.5727	1.10958	1.24857e-14	3.94193e-13	CG32407	NP_001261456.1 uncharacterized protein Dmel_CG32407, isoform B [Drosophila melanogaster]	-	-	-	-	-	-	-	--
FBgn0039789	374	393	342	839	889	756	8.02	8.47	7.965	16.474	17.611	16.521	8.15167	16.8687	1.04918	1.33007e-14	4.18907e-13	CG9717	NP_651812.1 uncharacterized protein Dmel_CG9717 [Drosophila melanogaster]	-	-	-	-	GO:0005887//integral component of plasma membrane;GO:0016020//membrane;GO:0016021//integral component of membrane	GO:0008271//secondary active sulfate transmembrane transporter activity;GO:0015116//sulfate transmembrane transporter activity;GO:0015301//anion:anion antiporter activity	GO:0055085//transmembrane transport	--
FBgn0020908	202	214	309	54	21	48	11.76	12.557	19.593	2.867	1.133	2.856	14.6367	2.28533	-2.67911	1.37492e-14	4.31989e-13	Scp1	Sarcoplasmic calcium-binding protein 1	-	-	-	-	GO:0005783//endoplasmic reticulum	GO:0005509//calcium ion binding	-	--
FBgn0284408	462	426	460	1549	1276	881	2.121	1.964	2.357	6.553	5.518	4.234	2.14733	5.435	1.33973	1.41921e-14	4.44835e-13	trol	terribly reduced optic lobes	-	-	-	-	GO:0005604//basement membrane	GO:0005515//protein binding	GO:0002052//positive regulation of neuroblast proliferation;GO:0007415//defasciculation of motor neuron axon;GO:0008045//motor neuron axon guidance;GO:0009887//animal organ morphogenesis;GO:0009888//tissue development;GO:0040037//negative regulation of fibroblast growth factor receptor signaling pathway;GO:0045199//maintenance of epithelial cell apical/basal polarity;GO:0045743//positive regulati…	--
FBgn0004644	41	45	38	203	177	175	0.994	1.096	1	4.506	3.964	4.323	1.03	4.26433	2.04968	1.45815e-14	4.55113e-13	hh	hedgehog	Environmental Information Processing	Signal transduction	ko04341//Hedgehog signaling pathway - fly	K06224	GO:0005576//extracellular region;GO:0005615//extracellular space;GO:0005634//nucleus;GO:0005737//cytoplasm;GO:0005768//endosome;GO:0005829//cytosol;GO:0005886//plasma membrane;GO:0030139//endocytic vesicle;GO:0031410//cytoplasmic vesicle	GO:0005113//patched binding;GO:0005509//calcium ion binding;GO:0008233//peptidase activity;GO:0016015//morphogen activity	GO:0001708//cell fate specification;GO:0001745//compound eye morphogenesis;GO:0001746//Bolwig's organ morphogenesis;GO:0001751//compound eye photoreceptor cell differentiation;GO:0002052//positive regulation of neuroblast proliferation;GO:0002385//mucosal immune response;GO:0007224//smoothened signaling pathway;GO:0007267//cell-cell signaling;GO:0007275//multicellular organism development;GO:0007…	--
FBgn0037727	695	614	492	1498	1374	1266	18.172	16.136	13.972	35.867	33.19	33.737	16.0933	34.2647	1.09026	1.45899e-14	4.55113e-13	Nepl12	Neprilysin-like 12	-	-	-	-	GO:0005886//plasma membrane	GO:0004222//metalloendopeptidase activity;GO:0008237//metallopeptidase activity;GO:0046872//metal ion binding	GO:0006508//proteolysis	--
FBgn0287184	161	157	174	1044	748	373	1.251	1.226	1.468	7.426	5.368	2.953	1.315	5.249	1.99698	1.47209e-14	4.58104e-13	FASN3	Fatty acid synthase 3	Metabolism;Metabolism;Metabolism	Global and overview maps;Global and overview maps;Lipid metabolism	ko01100//Metabolic pathways;ko01212//Fatty acid metabolism;ko00061//Fatty acid biosynthesis	K00665;K00665;K00665	-	GO:0004313//[acyl-carrier-protein] S-acetyltransferase activity;GO:0004314//[acyl-carrier-protein] S-malonyltransferase activity;GO:0004315//3-oxoacyl-[acyl-carrier-protein] synthase activity;GO:0004316//3-oxoacyl-[acyl-carrier-protein] reductase (NADPH) activity;GO:0004317//3-hydroxypalmitoyl-[acyl-carrier-protein] dehydratase activity;GO:0004320//oleoyl-[acyl-carrier-protein] hydrolase activity…	GO:0006633//fatty acid biosynthetic process;GO:0009058//biosynthetic process	--
FBgn0052311	554	536	668	1770	1654	1126	3.036	3.012	4.092	8.724	8.195	6.391	3.38	7.77	1.20089	1.49756e-14	4.6492e-13	zormin	zormin	Human Diseases;Human Diseases	Cardiovascular disease;Cardiovascular disease	ko05410//Hypertrophic cardiomyopathy;ko05414//Dilated cardiomyopathy	K12567;K12567	GO:0030018//Z disc;GO:0031430//M band	GO:0003779//actin binding;GO:0005515//protein binding	-	--
FBgn0035780	284	275	287	722	636	612	11.023	10.728	12.099	25.662	22.806	24.21	11.2833	24.226	1.10236	1.59928e-14	4.95321e-13	CG18417	NP_648119.1 uncharacterized protein Dmel_CG18417 [Drosophila melanogaster]	-	-	-	-	GO:0005615//extracellular space	GO:0004181//metallocarboxypeptidase activity;GO:0008270//zinc ion binding	GO:0006508//proteolysis	--
FBgn0033978	2011	1724	2352	5881	5141	3747	65.6	56.525	83.333	175.667	154.925	124.573	68.486	151.722	1.14755	1.96599e-14	6.06016e-13	Cyp6a23	Cyp6a23	-	-	-	-	GO:0005789//endoplasmic reticulum membrane;GO:0016020//membrane	GO:0004497//monooxygenase activity;GO:0005506//iron ion binding;GO:0016705//oxidoreductase activity, acting on paired donors, with incorporation or reduction of molecular oxygen;GO:0020037//heme binding	-	--
FBgn0030963	850	733	673	248	346	285	33.582	29.107	28.879	8.972	12.629	11.476	30.5227	11.0257	-1.46902	2.01256e-14	6.18908e-13	CG7101	NP_573329.2 uncharacterized protein Dmel_CG7101 [Drosophila melanogaster]	-	-	-	-	GO:0005634//nucleus	GO:0000976//transcription cis-regulatory region binding	GO:0006351//transcription, DNA-templated	zf-C2H2
FBgn0015929	7818	6467	5513	2617	3275	3226	160.038	132.901	122.617	48.976	61.886	67.381	138.519	59.4143	-1.2212	2.10928e-14	6.47128e-13	dpa	disc proliferation abnormal	Genetic Information Processing	Replication and repair	ko03030//DNA replication	K02212	GO:0005634//nucleus;GO:0042555//MCM complex;GO:0071162//CMG complex	GO:0003677//DNA binding;GO:0003678//DNA helicase activity;GO:0003688//DNA replication origin binding;GO:0003697//single-stranded DNA binding;GO:0005524//ATP binding	GO:0000727//double-strand break repair via break-induced replication;GO:0006260//DNA replication;GO:0006267//pre-replicative complex assembly involved in nuclear cell cycle DNA replication;GO:0006268//DNA unwinding involved in DNA replication;GO:0006270//DNA replication initiation;GO:0006271//DNA strand elongation involved in DNA replication;GO:0007052//mitotic spindle organization;GO:0032508//DN…	--
FBgn0031563	378	402	705	1488	1529	1363	37.633	40.227	76.235	135.656	140.633	138.299	51.365	138.196	1.42786	2.18421e-14	6.66978e-13	CG10031	ACH92394.1 FI07333p, partial [Drosophila melanogaster]	-	-	-	-	-	GO:0004867//serine-type endopeptidase inhibitor activity	-	--
FBgn0004513	202	189	155	467	561	463	2.806	2.639	2.339	5.941	7.2	6.555	2.59467	6.56533	1.33932	2.34728e-14	7.15098e-13	Mdr65	Multi drug resistance 65	Environmental Information Processing	Membrane transport	ko02010//ABC transporters	K05658	GO:0005919//pleated septate junction;GO:0016021//integral component of membrane;GO:0043190//ATP-binding cassette (ABC) transporter complex	GO:0005524//ATP binding;GO:0008559//ABC-type xenobiotic transporter activity;GO:0015562//efflux transmembrane transporter activity;GO:0016887//ATP hydrolysis activity;GO:0042626//ATPase-coupled transmembrane transporter activity;GO:0140359//ABC-type transporter activity	GO:0009636//response to toxic substance;GO:0017085//response to insecticide;GO:0042908//xenobiotic transport;GO:0055085//transmembrane transport;GO:0060857//establishment of glial blood-brain barrier;GO:0097254//renal tubular secretion	--
FBgn0017551	3233	2908	2374	995	1319	1379	119.665	108.185	95.439	33.724	45.103	52.02	107.763	43.6157	-1.30494	2.36718e-14	7.19479e-13	Rca1	Regulator of cyclin A1	-	-	-	-	GO:0005634//nucleus;GO:0019005//SCF ubiquitin ligase complex	-	GO:0000082//G1/S transition of mitotic cell cycle;GO:0007088//regulation of mitotic nuclear division;GO:0031146//SCF-dependent proteasomal ubiquitin-dependent protein catabolic process;GO:0045835//negative regulation of meiotic nuclear division;GO:1904667//negative regulation of ubiquitin protein ligase activity	--
FBgn0034328	133	61	50	1563	1021	846	16.325	7.526	6.666	175.681	115.78	105.833	10.1723	132.431	3.70252	2.38336e-14	7.21388e-13	BomBc1	Bomanin Bicipital 1	-	-	-	-	GO:0005576//extracellular region	-	GO:0006952//defense response;GO:0009617//response to bacterium;GO:0019731//antibacterial humoral response;GO:0045087//innate immune response;GO:0050830//defense response to Gram-positive bacterium	--
FBgn0013272	3256	3641	4177	10127	8736	6549	44.229	49.56	61.532	125.743	109.439	90.583	51.7737	108.588	1.06858	2.39006e-14	7.21388e-13	Gp150	Gp150	-	-	-	-	GO:0005886//plasma membrane;GO:0016021//integral component of membrane	GO:0005515//protein binding	GO:0007185//transmembrane receptor protein tyrosine phosphatase signaling pathway;GO:0048749//compound eye development	--
FBgn0034279	339	335	224	795	747	803	9.394	9.331	6.742	20.173	19.124	22.678	8.489	20.6583	1.28306	2.54109e-14	7.65202e-13	CG18635	NP_611267.1 uncharacterized protein Dmel_CG18635 [Drosophila melanogaster]	-	-	-	-	GO:0005886//plasma membrane;GO:0016020//membrane;GO:0016021//integral component of membrane	-	GO:0043652//engulfment of apoptotic cell;GO:0070782//phosphatidylserine exposure on apoptotic cell surface;GO:1902742//apoptotic process involved in development	--
FBgn0032906	2104	2179	1917	866	1101	1071	130.097	136.346	129.225	49.462	63.513	67.54	131.889	60.1717	-1.13217	3.08407e-14	9.26572e-13	RPA2	Replication protein A2	Genetic Information Processing;Genetic Information Processing;Genetic Information Processing;Genetic Information Processing;Genetic Information Processing	Replication and repair;Replication and repair;Replication and repair;Replication and repair;Replication and repair	ko03420//Nucleotide excision repair;ko03030//DNA replication;ko03460//Fanconi anemia pathway;ko03440//Homologous recombination;ko03430//Mismatch repair	K10739;K10739;K10739;K10739;K10739	GO:0000781//chromosome, telomeric region;GO:0005634//nucleus;GO:0005662//DNA replication factor A complex;GO:0035861//site of double-strand break	GO:0003677//DNA binding;GO:0003697//single-stranded DNA binding	GO:0000724//double-strand break repair via homologous recombination;GO:0006260//DNA replication;GO:0006281//DNA repair;GO:0006289//nucleotide-excision repair;GO:0006310//DNA recombination	--
FBgn0260399	3453	2962	2914	1378	1732	1562	64.067	55.225	58.687	23.437	29.661	29.531	59.3263	27.543	-1.10699	3.14773e-14	9.43524e-13	gwl	greatwall	-	-	-	-	GO:0005634//nucleus;GO:0005635//nuclear envelope;GO:0005737//cytoplasm;GO:0005815//microtubule organizing center	GO:0004672//protein kinase activity;GO:0004674//protein serine/threonine kinase activity;GO:0005524//ATP binding;GO:0071889//14-3-3 protein binding	GO:0000278//mitotic cell cycle;GO:0006468//protein phosphorylation;GO:0007088//regulation of mitotic nuclear division;GO:0007143//female meiotic nuclear division;GO:0007144//female meiosis I;GO:0007346//regulation of mitotic cell cycle;GO:0018105//peptidyl-serine phosphorylation;GO:0030261//chromosome condensation;GO:0032515//negative regulation of phosphoprotein phosphatase activity;GO:0035556//…	--
FBgn0000047	2439	3976	3799	1413	1225	1495	87.842	143.93	148.61	46.601	40.76	54.875	126.794	47.412	-1.41916	3.23771e-14	9.66052e-13	Act88F	Actin 88F	-	-	-	-	GO:0005865//striated muscle thin filament;GO:0030016//myofibril;GO:0030018//Z disc	GO:0005524//ATP binding	GO:0000281//mitotic cytokinesis;GO:0014866//skeletal myofibril assembly;GO:0071689//muscle thin filament assembly	--
FBgn0034382	364	460	619	1348	1364	1118	21.143	26.855	39.051	71.698	73.193	66.183	29.0163	70.358	1.27785	3.65182e-14	1.08218e-12	CG18609	NP_611365.2 uncharacterized protein Dmel_CG18609 [Drosophila melanogaster]	Metabolism;Metabolism;Metabolism;Metabolism	Global and overview maps;Global and overview maps;Lipid metabolism;Lipid metabolism	ko01100//Metabolic pathways;ko01212//Fatty acid metabolism;ko01040//Biosynthesis of unsaturated fatty acids;ko00062//Fatty acid elongation	K10249;K10249;K10249;K10249	GO:0016021//integral component of membrane;GO:0030176//integral component of endoplasmic reticulum membrane	GO:0009922//fatty acid elongase activity;GO:0102336//3-oxo-arachidoyl-CoA synthase activity;GO:0102337//3-oxo-cerotoyl-CoA synthase activity;GO:0102338//3-oxo-lignoceronyl-CoA synthase activity;GO:0102756//very-long-chain 3-ketoacyl-CoA synthase activity	GO:0019367//fatty acid elongation, saturated fatty acid;GO:0030148//sphingolipid biosynthetic process;GO:0030497//fatty acid elongation;GO:0034625//fatty acid elongation, monounsaturated fatty acid;GO:0034626//fatty acid elongation, polyunsaturated fatty acid;GO:0042761//very long-chain fatty acid biosynthetic process	--
FBgn0000351	1938	1711	1330	575	690	786	69.106	61.521	52.035	18.667	22.477	28.345	60.8873	23.163	-1.39432	4.35316e-14	1.27267e-12	cort	cortex	-	-	-	-	GO:0005680//anaphase-promoting complex;GO:0005737//cytoplasm	GO:0005515//protein binding;GO:0010997//anaphase-promoting complex binding;GO:0097027//ubiquitin-protein transferase activator activity;GO:1990757//ubiquitin ligase activator activity	GO:0007143//female meiotic nuclear division;GO:0007144//female meiosis I;GO:0007147//female meiosis II;GO:0007279//pole cell formation;GO:0007343//egg activation;GO:0007349//cellularization;GO:0031145//anaphase-promoting complex-dependent catabolic process;GO:0045143//homologous chromosome segregation;GO:0048477//oogenesis;GO:1904668//positive regulation of ubiquitin protein ligase activity;GO:19…	--
FBgn0085227	263	168	152	589	581	587	28.399	18.233	17.827	58.239	57.959	64.599	21.4863	60.2657	1.48792	4.72401e-14	1.37492e-12	CG34198	-	-	-	-	-	-	-	-	--
FBgn0262141	6	11	13	113	136	78	0.787	1.45	1.852	13.571	16.479	10.426	1.363	13.492	3.30725	4.99915e-14	1.45176e-12	CG42867	NP_001188983.1 uncharacterized protein Dmel_CG42867 [Drosophila melanogaster]	-	-	-	-	-	-	-	--
FBgn0036742	511	575	443	1153	1075	1060	16.366	18.876	15.778	34.623	32.456	35.059	17.0067	34.046	1.00138	5.39428e-14	1.55956e-12	CG7497	NP_001287100.1 uncharacterized protein Dmel_CG7497, isoform C [Drosophila melanogaster]	-	-	-	-	GO:0005886//plasma membrane;GO:0016021//integral component of membrane	GO:0004930//G protein-coupled receptor activity	GO:0007186//G protein-coupled receptor signaling pathway;GO:0007189//adenylate cyclase-activating G protein-coupled receptor signaling pathway;GO:0007204//positive regulation of cytosolic calcium ion concentration	--
FBgn0033222	246	234	215	529	563	549	24.088	22.813	22.903	46.898	50.725	54.245	23.268	50.6227	1.12144	5.99621e-14	1.72975e-12	CG12824	NP_001097214.1 uncharacterized protein Dmel_CG12824, isoform B [Drosophila melanogaster]	-	-	-	-	GO:0016021//integral component of membrane	-	-	--
FBgn0050015	369	348	345	1009	998	682	3.949	3.601	4.273	9.736	9.722	7.554	3.941	9.004	1.192	6.08423e-14	1.75127e-12	CG30015	NP_001097262.1 uncharacterized protein Dmel_CG30015, isoform C [Drosophila melanogaster]	-	-	-	-	-	-	-	--
FBgn0035112	92	93	92	302	294	264	10.414	10.576	11.551	31.955	31.167	30.798	10.847	31.3067	1.52917	6.13312e-14	1.76145e-12	CG13877	NP_612014.2 uncharacterized protein Dmel_CG13877, isoform B [Drosophila melanogaster]	-	-	-	-	-	-	-	--
FBgn0261508	20	29	36	169	190	131	4.505	6.566	8.808	34.863	39.543	30.077	6.62633	34.8277	2.39395	6.22172e-14	1.78297e-12	CG42656	NP_001189192.1 uncharacterized protein Dmel_CG42656 [Drosophila melanogaster]	-	-	-	-	-	-	-	--
FBgn0000277	73	59	21	260	373	266	11.813	9.651	3.691	38.526	55.762	43.868	8.385	46.052	2.45738	6.31608e-14	1.80604e-12	CecA2	Cecropin A2	Organismal Systems	Immune system	ko04624//Toll and Imd signaling pathway	K20696	GO:0005576//extracellular region;GO:0005615//extracellular space	-	GO:0002213//defense response to insect;GO:0006959//humoral immune response;GO:0009617//response to bacterium;GO:0019731//antibacterial humoral response;GO:0045087//innate immune response;GO:0050829//defense response to Gram-negative bacterium;GO:0050830//defense response to Gram-positive bacterium	--
FBgn0034294	112	106	80	318	315	307	3.679	3.623	3.02	9.719	9.871	10.437	3.44067	10.009	1.54054	6.46813e-14	1.84212e-12	Muc55B	Mucin 55B	-	-	-	-	GO:0031012//extracellular matrix	GO:0005201//extracellular matrix structural constituent	-	--
FBgn0035644	1100	1048	856	429	477	455	37.434	35.847	31.64	13.369	14.997	15.781	34.9737	14.7157	-1.24892	6.47053e-14	1.84212e-12	DNApol-epsilon58	DNA polymerase epsilon 58kD subunit	Genetic Information Processing;Genetic Information Processing;Genetic Information Processing	Replication and repair;Replication and repair;Replication and repair	ko03420//Nucleotide excision repair;ko03030//DNA replication;ko03410//Base excision repair	K02325;K02325;K02325	GO:0008622//epsilon DNA polymerase complex	GO:0003677//DNA binding	GO:0006260//DNA replication;GO:0006261//DNA-dependent DNA replication;GO:0032877//positive regulation of DNA endoreduplication;GO:0042023//DNA endoreduplication;GO:0042276//error-prone translesion synthesis;GO:0045004//DNA replication proofreading;GO:0090068//positive regulation of cell cycle process;GO:1902969//mitotic DNA replication	--
FBgn0025777	1047	844	960	434	466	405	28.51	23.117	28.121	9.746	11.037	10.808	26.5827	10.5303	-1.33593	6.83263e-14	1.94097e-12	homer	homer	Environmental Information Processing	Signal transduction	ko04068//FoxO signaling pathway	K15010	GO:0005737//cytoplasm;GO:0005783//endoplasmic reticulum;GO:0005886//plasma membrane;GO:0030425//dendrite	GO:0035256//G protein-coupled glutamate receptor binding	GO:0007216//G protein-coupled glutamate receptor signaling pathway;GO:0030534//adult behavior;GO:0040012//regulation of locomotion;GO:0045471//response to ethanol;GO:0045938//positive regulation of circadian sleep/wake cycle, sleep;GO:0048149//behavioral response to ethanol;GO:2001256//regulation of store-operated calcium entry	--
FBgn0031850	167	159	173	451	460	390	4.096	4.032	4.737	10.414	10.891	9.923	4.28833	10.4093	1.27939	7.23728e-14	2.047e-12	Tsp	Thrombospondin	Cellular Processes;Environmental Information Processing	Transport and catabolism;Signaling molecules and interaction	ko04145//Phagosome;ko04512//ECM-receptor interaction	K04659;K04659	GO:0005576//extracellular region;GO:0005927//muscle tendon junction;GO:0031012//extracellular matrix;GO:0032991//protein-containing complex;GO:0062023//collagen-containing extracellular matrix	GO:0005509//calcium ion binding;GO:0008201//heparin binding	GO:0007155//cell adhesion;GO:0007517//muscle organ development;GO:0016203//muscle attachment;GO:0033627//cell adhesion mediated by integrin	--
FBgn0261671	380	309	356	1070	1021	686	1.337	1.093	1.362	3.45	3.321	2.462	1.264	3.07767	1.28384	8.04509e-14	2.26077e-12	tweek	tweek	-	-	-	-	GO:0016021//integral component of membrane;GO:0031594//neuromuscular junction;GO:0098793//presynapse	-	GO:0048488//synaptic vesicle endocytosis;GO:1900242//regulation of synaptic vesicle endocytosis	--
FBgn0033504	467	491	526	1365	1248	919	10.125	12.521	14.295	29.141	26.915	23.885	12.3137	26.647	1.11371	8.62799e-14	2.41417e-12	CAP	CAP	Cellular Processes;Organismal Systems;Organismal Systems	Cellular community - eukaryotes;Endocrine system;Endocrine system	ko04520//Adherens junction;ko04910//Insulin signaling pathway;ko03320//PPAR signaling pathway	K06086;K06086;K06086	-	GO:0005515//protein binding	GO:0007015//actin filament organization;GO:0007605//sensory perception of sound;GO:0016203//muscle attachment;GO:0050954//sensory perception of mechanical stimulus	--
FBgn0025837	240	369	242	894	704	752	7.265	11.237	7.972	24.663	19.605	22.946	8.82467	22.4047	1.34419	9.26048e-14	2.5856e-12	CG17636	NP_001245442.1 uncharacterized protein Dmel_CG17636, isoform C [Drosophila melanogaster]	Metabolism;Metabolism;Metabolism;Metabolism	Global and overview maps;Metabolism of other amino acids;Lipid metabolism;Metabolism of other amino acids	ko01100//Metabolic pathways;ko00480//Glutathione metabolism;ko00590//Arachidonic acid metabolism;ko00430//Taurine and hypotaurine metabolism	K18592;K18592;K18592;K18592	GO:0005886//plasma membrane;GO:0016021//integral component of membrane	GO:0000048//peptidyltransferase activity;GO:0036374//glutathione hydrolase activity	GO:0006751//glutathione catabolic process	--
FBgn0085232	108	94	146	347	431	347	11.596	10.145	17.027	34.118	42.754	37.973	12.9227	38.2817	1.56675	9.41316e-14	2.62146e-12	CG34203	ABL75692.1 IP17152p, partial [Drosophila melanogaster]	-	-	-	-	-	-	-	--
FBgn0051189	135	109	156	422	372	374	9.332	7.573	11.713	26.713	23.757	26.349	9.53933	25.6063	1.42454	9.42913e-14	2.62146e-12	CG31189	NP_732580.3 uncharacterized protein Dmel_CG31189 [Drosophila melanogaster]	-	-	-	-	GO:0005615//extracellular space	-	-	--
FBgn0259140	116	95	138	653	442	304	0.595	0.49	0.769	3.068	2.095	1.589	0.618	2.25067	1.86467	1.02327e-13	2.83279e-12	CG42255	NP_729748.3 uncharacterized protein Dmel_CG42255 [Drosophila melanogaster]	Organismal Systems	Digestive system	ko04977//Vitamin digestion and absorption	K14616	GO:0005829//cytosol	GO:0005509//calcium ion binding	-	--
FBgn0004228	371	301	359	771	806	725	29.487	23.984	30.791	55.996	59.156	58.674	28.0873	57.942	1.04469	1.07042e-13	2.95704e-12	mex1	midgut expression 1	-	-	-	-	GO:0016021//integral component of membrane	-	GO:0007275//multicellular organism development	--
FBgn0045823	1836	1826	2301	5075	4600	3503	48.48	48.441	65.867	122.57	112.208	94.183	54.2627	109.654	1.01492	1.10217e-13	3.03188e-12	vsg	visgun	Cellular Processes	Transport and catabolism	ko04142//Lysosome	K06546	GO:0016021//integral component of membrane;GO:0031410//cytoplasmic vesicle;GO:0035324//female germline ring canal;GO:0098549//somatic ring canal	-	GO:0007616//long-term memory;GO:0032504//multicellular organism reproduction;GO:0042127//regulation of cell population proliferation;GO:0048149//behavioral response to ethanol	--
FBgn0003124	4282	3610	3728	1809	2222	2048	104.383	88.588	98.987	40.118	49.716	50.942	97.3193	46.9253	-1.05236	1.37832e-13	3.77562e-12	polo	polo	Environmental Information Processing	Signal transduction	ko04068//FoxO signaling pathway	K06631	GO:0000776//kinetochore;GO:0000922//spindle pole;GO:0000940//outer kinetochore;GO:0005634//nucleus;GO:0005635//nuclear envelope;GO:0005737//cytoplasm;GO:0005813//centrosome;GO:0005814//centriole;GO:0005819//spindle;GO:0005828//kinetochore microtubule;GO:0005874//microtubule;GO:0030496//midbody;GO:1990023//mitotic spindle midzone	GO:0004672//protein kinase activity;GO:0004674//protein serine/threonine kinase activity;GO:0005515//protein binding;GO:0005524//ATP binding	GO:0000278//mitotic cell cycle;GO:0000915//actomyosin contractile ring assembly;GO:0006468//protein phosphorylation;GO:0007058//spindle assembly involved in female meiosis II;GO:0007098//centrosome cycle;GO:0007112//male meiosis cytokinesis;GO:0007140//male meiotic nuclear division;GO:0007143//female meiotic nuclear division;GO:0007147//female meiosis II;GO:0007344//pronuclear fusion;GO:0007406//…	--
FBgn0051445	287	322	444	990	957	786	5.385	6.116	9.077	17.094	16.736	15.097	6.85933	16.309	1.24953	1.41072e-13	3.85628e-12	CG31445	NP_001263064.1 uncharacterized protein Dmel_CG31445, isoform B [Drosophila melanogaster]	Metabolism;Metabolism	Global and overview maps;Metabolism of other amino acids	ko01100//Metabolic pathways;ko00480//Glutathione metabolism	K11140;K11140	GO:0005737//cytoplasm	GO:0008237//metallopeptidase activity;GO:0008270//zinc ion binding;GO:0042277//peptide binding;GO:0070006//metalloaminopeptidase activity	GO:0006508//proteolysis;GO:0043171//peptide catabolic process	--
FBgn0053109	638	598	1030	2400	1979	1768	35.756	33.685	62.698	123.169	102.465	100.985	44.0463	108.873	1.30555	1.46083e-13	3.9849e-12	CG33109	NP_788677.1 uncharacterized protein Dmel_CG33109 [Drosophila melanogaster]	-	-	-	-	-	-	-	--
FBgn0032127	3388	3405	3485	670	1605	1121	127.205	128.496	142.118	23.035	55.672	42.896	132.606	40.5343	-1.70993	1.51014e-13	4.10224e-12	CG13114	NP_609297.2 uncharacterized protein Dmel_CG13114 [Drosophila melanogaster]	-	-	-	-	GO:0042600//egg chorion	-	-	--
FBgn0033357	641	457	609	1188	1419	1259	103.43	74.263	106.612	175.566	211.68	207.125	94.7683	198.124	1.06392	1.51996e-13	4.12033e-12	Tom7	Translocase of outer membrane 7	Cellular Processes	Transport and catabolism	ko04137//Mitophagy - animal	K17771	GO:0005742//mitochondrial outer membrane translocase complex;GO:0016021//integral component of membrane	GO:0015450//protein-transporting ATPase activity	GO:0006626//protein targeting to mitochondrion;GO:0030150//protein import into mitochondrial matrix	--
FBgn0034021	8034	6303	5092	2181	3196	2675	186.132	147.753	129.579	45.525	68.74	62.161	154.488	58.8087	-1.39339	1.63597e-13	4.42559e-12	CG8180	NP_001286458.1 uncharacterized protein Dmel_CG8180, isoform B [Drosophila melanogaster]	-	-	-	-	GO:0016021//integral component of membrane	-	-	--
FBgn0061476	999	826	799	336	385	423	25.711	21.367	22.335	7.919	9.154	11.095	23.1377	9.38933	-1.30115	1.69333e-13	4.57128e-12	Zwilch	Zwilch	-	-	-	-	GO:0000776//kinetochore;GO:0005737//cytoplasm;GO:0005828//kinetochore microtubule;GO:0051233//spindle midzone;GO:1990423//RZZ complex	-	GO:0007093//mitotic cell cycle checkpoint signaling;GO:0007094//mitotic spindle assembly checkpoint signaling;GO:0051301//cell division	--
FBgn0019686	7012	5891	6087	2920	3714	3284	190.551	160.78	179.527	72.614	93.109	90.802	176.953	85.5083	-1.04923	1.73945e-13	4.67643e-12	lok	loki	Cellular Processes;Human Diseases;Cellular Processes;Cellular Processes	Cell growth and death;Infectious disease: viral;Cell growth and death;Cell growth and death	ko04110//Cell cycle;ko05166//Human T-cell leukemia virus 1 infection;ko04218//Cellular senescence;ko04115//p53 signaling pathway	K06641;K06641;K06641;K06641	GO:0005634//nucleus;GO:0005737//cytoplasm;GO:0016607//nuclear speck	GO:0004672//protein kinase activity;GO:0004674//protein serine/threonine kinase activity;GO:0005515//protein binding;GO:0005524//ATP binding;GO:0050321//tau-protein kinase activity	GO:0000077//DNA damage checkpoint signaling;GO:0006282//regulation of DNA repair;GO:0006468//protein phosphorylation;GO:0006915//apoptotic process;GO:0006919//activation of cysteine-type endopeptidase activity involved in apoptotic process;GO:0006974//cellular response to DNA damage stimulus;GO:0007281//germ cell development;GO:0008630//intrinsic apoptotic signaling pathway in response to DNA dam…	--
FBgn0001120	9000	8112	6701	3308	4137	4190	560.135	507.447	452.977	188.528	237.869	265.773	506.853	230.723	-1.1354	1.78184e-13	4.78052e-12	gnu	giant nuclei	-	-	-	-	GO:1902911//protein kinase complex	GO:0005515//protein binding;GO:0030295//protein kinase activator activity	GO:0000278//mitotic cell cycle;GO:0007343//egg activation;GO:0007346//regulation of mitotic cell cycle;GO:0008156//negative regulation of DNA replication;GO:0045860//positive regulation of protein kinase activity;GO:0051726//regulation of cell cycle	--
FBgn0029810	515	523	439	1034	1308	987	12.627	12.888	11.69	23.215	29.627	24.663	12.4017	25.835	1.05879	1.79979e-13	4.81878e-12	CG12239	NP_572265.1 uncharacterized protein Dmel_CG12239 [Drosophila melanogaster]	-	-	-	-	-	-	-	--
FBgn0023181	1813	1587	1295	646	772	724	64.488	56.737	50.031	21.041	25.369	26.246	57.0853	24.2187	-1.237	2.18765e-13	5.80952e-12	Orc4	Origin recognition complex subunit 4	Cellular Processes	Cell growth and death	ko04110//Cell cycle	K02606	GO:0000808//origin recognition complex;GO:0005634//nucleus;GO:0005664//nuclear origin of replication recognition complex	GO:0003677//DNA binding;GO:0003688//DNA replication origin binding	GO:0006260//DNA replication;GO:0006270//DNA replication initiation	--
FBgn0037746	2113	2029	1690	753	1049	884	56.107	54.166	48.749	18.316	25.748	23.927	53.0073	22.6637	-1.22581	2.88881e-13	7.5789e-12	CG8478	NP_001163576.1 uncharacterized protein Dmel_CG8478, isoform D [Drosophila melanogaster]	-	-	-	-	GO:0005634//nucleus	GO:0000977//RNA polymerase II transcription regulatory region sequence-specific DNA binding;GO:0000978//RNA polymerase II cis-regulatory region sequence-specific DNA binding;GO:0000981//DNA-binding transcription factor activity, RNA polymerase II-specific;GO:0043565//sequence-specific DNA binding	GO:0006357//regulation of transcription by RNA polymerase II	zf-C2H2
FBgn0034317	129	69	47	392	324	383	8.547	4.595	3.382	23.784	19.833	25.863	5.508	23.16	2.07203	3.26071e-13	8.50329e-12	CG14499	-	-	-	-	-	-	GO:0030246//carbohydrate binding	-	--
FBgn0035993	652	608	571	255	294	235	18.221	17.076	17.324	6.533	7.599	6.688	17.5403	6.94	-1.33767	3.29065e-13	8.56423e-12	Nf-YA	Nuclear factor Y-box A	Human Diseases;Human Diseases;Organismal Systems	Neurodegenerative disease;Infectious disease: bacterial;Immune system	ko05017//Spinocerebellar ataxia;ko05152//Tuberculosis;ko04612//Antigen processing and presentation	K08064;K08064;K08064	GO:0005634//nucleus;GO:0016602//CCAAT-binding factor complex	GO:0000976//transcription cis-regulatory region binding;GO:0000978//RNA polymerase II cis-regulatory region sequence-specific DNA binding;GO:0001228//DNA-binding transcription activator activity, RNA polymerase II-specific;GO:0003700//DNA-binding transcription factor activity	GO:0006355//regulation of transcription, DNA-templated;GO:0010723//positive regulation of transcription from RNA polymerase II promoter in response to iron;GO:0045466//R7 cell differentiation;GO:0045893//positive regulation of transcription, DNA-templated	NF-YA
FBgn0013279	38	34	25	255	290	105	0.921	0.822	0.649	5.628	6.441	2.577	0.797333	4.882	2.61422	3.51183e-13	9.12166e-12	Hsp70Bc	Heat-shock-protein-70Bc	Genetic Information Processing;Cellular Processes;Genetic Information Processing;Organismal Systems	Folding, sorting and degradation;Transport and catabolism;Transcription;Aging	ko04141//Protein processing in endoplasmic reticulum;ko04144//Endocytosis;ko03040//Spliceosome;ko04213//Longevity regulating pathway - multiple species	K03283;K03283;K03283;K03283	GO:0005634//nucleus;GO:0005737//cytoplasm;GO:0005829//cytosol;GO:0005886//plasma membrane	GO:0005524//ATP binding;GO:0016887//ATP hydrolysis activity;GO:0031072//heat shock protein binding;GO:0044183//protein folding chaperone;GO:0051082//unfolded protein binding;GO:0051787//misfolded protein binding;GO:0140662//ATP-dependent protein folding chaperone	GO:0001666//response to hypoxia;GO:0006986//response to unfolded protein;GO:0009408//response to heat;GO:0009636//response to toxic substance;GO:0016192//vesicle-mediated transport;GO:0034620//cellular response to unfolded protein;GO:0035080//heat shock-mediated polytene chromosome puffing;GO:0042026//protein refolding;GO:0051085//chaperone cofactor-dependent protein refolding	--
FBgn0030893	698	591	472	1264	1351	1288	16.274	13.769	11.903	27.502	29.377	31.068	13.982	29.3157	1.0681	3.74843e-13	9.69758e-12	RhoGAP16F	Rho GTPase activating protein at 16F	-	-	-	-	GO:0005737//cytoplasm	GO:0005096//GTPase activator activity	GO:0007165//signal transduction;GO:0007480//imaginal disc-derived leg morphogenesis;GO:0043087//regulation of GTPase activity;GO:0043547//positive regulation of GTPase activity	--
FBgn0261538	20	18	23	133	99	159	2.298	2.022	2.756	13.995	10.508	18.619	2.35867	14.374	2.60742	3.98825e-13	1.0257e-11	CG42662	NP_001188943.1 uncharacterized protein Dmel_CG42662, isoform A [Drosophila melanogaster]	-	-	-	-	-	-	-	--
FBgn0285955	87	65	67	357	320	199	0.71	0.435	0.736	2.649	2.595	1.617	0.627	2.287	1.86692	4.0676e-13	1.04405e-11	cv-c	crossveinless c	-	-	-	-	GO:0005938//cell cortex;GO:0016323//basolateral plasma membrane;GO:0045202//synapse	GO:0005096//GTPase activator activity;GO:0008289//lipid binding	GO:0000132//establishment of mitotic spindle orientation;GO:0000902//cell morphogenesis;GO:0000912//assembly of actomyosin apparatus involved in cytokinesis;GO:0007052//mitotic spindle organization;GO:0007091//metaphase/anaphase transition of mitotic cell cycle;GO:0007165//signal transduction;GO:0007266//Rho protein signal transduction;GO:0007274//neuromuscular synaptic transmission;GO:0007391//d…	--
FBgn0013733	477	420	574	2000	1618	930	1.617	1.354	1.994	5.959	4.764	3.111	1.655	4.61133	1.47835	4.14909e-13	1.06287e-11	shot	short stop	-	-	-	-	GO:0000235//astral microtubule;GO:0005737//cytoplasm;GO:0005856//cytoskeleton;GO:0005874//microtubule;GO:0005886//plasma membrane;GO:0005912//adherens junction;GO:0005927//muscle tendon junction;GO:0016020//membrane;GO:0030056//hemidesmosome;GO:0030175//filopodium;GO:0030426//growth cone;GO:0035371//microtubule plus-end;GO:0044295//axonal growth cone;GO:0045169//fusome	GO:0003779//actin binding;GO:0005198//structural molecule activity;GO:0005509//calcium ion binding;GO:0005515//protein binding;GO:0008017//microtubule binding	GO:0000226//microtubule cytoskeleton organization;GO:0001578//microtubule bundle formation;GO:0007017//microtubule-based process;GO:0007026//negative regulation of microtubule depolymerization;GO:0007391//dorsal closure;GO:0007409//axonogenesis;GO:0007424//open tracheal system development;GO:0016199//axon midline choice point recognition;GO:0016203//muscle attachment;GO:0016319//mushroom body dev…	--
FBgn0261575	22764	30116	28082	12591	14652	15010	621.519	826.449	832.762	314.795	369.577	417.67	760.243	367.347	-1.04932	4.37976e-13	1.11757e-11	tobi	target of brain insulin	-	-	-	-	-	GO:0004553//hydrolase activity, hydrolyzing O-glycosyl compounds	GO:0005975//carbohydrate metabolic process	--
FBgn0037935	158	209	270	718	614	526	3.145	4.181	5.837	13.087	11.291	10.671	4.38767	11.683	1.41288	4.5256e-13	1.15252e-11	CG6834	NP_650104.2 uncharacterized protein Dmel_CG6834 [Drosophila melanogaster]	-	-	-	-	-	GO:0017022//myosin binding	-	--
FBgn0261703	79	77	108	293	324	256	0.953	0.851	1.361	3.049	3.257	2.957	1.055	3.08767	1.54927	4.58658e-13	1.16351e-11	gce	germ cell-expressed bHLH-PAS	-	-	-	-	GO:0005634//nucleus;GO:0005667//transcription regulator complex;GO:0005737//cytoplasm	GO:0003677//DNA binding;GO:0003700//DNA-binding transcription factor activity;GO:0004879//nuclear receptor activity;GO:0005500//juvenile hormone binding;GO:0008134//transcription factor binding;GO:0046982//protein heterodimerization activity;GO:0046983//protein dimerization activity	GO:0006355//regulation of transcription, DNA-templated;GO:0035626//juvenile hormone mediated signaling pathway;GO:0043069//negative regulation of programmed cell death;GO:0045944//positive regulation of transcription by RNA polymerase II	bHLH
FBgn0003423	2304	2103	1952	1087	1208	1128	41.339	37.894	39.351	17.366	19.478	20.619	39.528	19.1543	-1.0452	4.82605e-13	1.22188e-11	slgA	sluggish A	Metabolism;Metabolism	Global and overview maps;Amino acid metabolism	ko01100//Metabolic pathways;ko00330//Arginine and proline metabolism	K00318;K00318	GO:0005739//mitochondrion;GO:0005759//mitochondrial matrix	GO:0004657//proline dehydrogenase activity;GO:0071949//FAD binding	GO:0002118//aggressive behavior;GO:0006537//glutamate biosynthetic process;GO:0006562//proline catabolic process;GO:0007626//locomotory behavior;GO:0010133//proline catabolic process to glutamate;GO:0042331//phototaxis	--
FBgn0038416	302	251	284	733	621	595	10.495	8.767	10.72	23.326	19.938	21.074	9.994	21.446	1.10157	5.13871e-13	1.29601e-11	CG17930	NP_650533.1 uncharacterized protein Dmel_CG17930 [Drosophila melanogaster]	-	-	-	-	GO:0016021//integral component of membrane	GO:0022857//transmembrane transporter activity	GO:0055085//transmembrane transport	--
FBgn0052023	60	70	92	283	269	230	6.565	7.698	10.934	28.356	27.192	25.649	8.399	27.0657	1.68817	5.2455e-13	1.32039e-11	CG32023	NP_729415.2 uncharacterized protein Dmel_CG32023 [Drosophila melanogaster]	-	-	-	-	-	-	-	--
FBgn0283649	1023	996	925	383	524	441	38.309	37.489	37.623	13.134	18.099	16.831	37.807	16.0213	-1.23866	6.24955e-13	1.56708e-11	elgi	early girl	Cellular Processes	Transport and catabolism	ko04144//Endocytosis	K11981	GO:0005737//cytoplasm	GO:0004842//ubiquitin-protein transferase activity;GO:0008270//zinc ion binding;GO:0017022//myosin binding;GO:0061630//ubiquitin protein ligase activity	GO:0000209//protein polyubiquitination;GO:0008586//imaginal disc-derived wing vein morphogenesis;GO:0016567//protein ubiquitination;GO:0035220//wing disc development;GO:0035332//positive regulation of hippo signaling;GO:0051445//regulation of meiotic cell cycle	--
FBgn0002869	24	5	6	124	138	117	4.308	0.902	1.17	20.343	22.887	21.317	2.12667	21.5157	3.33872	6.29091e-13	1.57442e-11	MtnB	Metallothionein B	-	-	-	-	-	GO:0005507//copper ion binding;GO:0046872//metal ion binding	GO:0010038//response to metal ion;GO:0055065//metal ion homeostasis	--
FBgn0031119	774	665	601	264	323	281	13.77	11.891	11.613	4.301	5.309	5.095	12.4247	4.90167	-1.34186	6.53819e-13	1.63317e-11	CG1812	NP_608397.1 uncharacterized protein Dmel_CG1812 [Drosophila melanogaster]	-	-	-	-	-	GO:0003779//actin binding;GO:0005515//protein binding	GO:0016567//protein ubiquitination	--
FBgn0035006	208	118	70	556	616	484	6.766	3.858	2.473	16.561	18.512	16.045	4.36567	17.0393	1.9646	6.82697e-13	1.69879e-11	CG4563	NP_611913.1 uncharacterized protein Dmel_CG4563 [Drosophila melanogaster]	-	-	-	-	-	GO:0004467//long-chain fatty acid-CoA ligase activity;GO:0015645//fatty acid ligase activity;GO:0016405//CoA-ligase activity	GO:0001676//long-chain fatty acid metabolic process;GO:0006633//fatty acid biosynthetic process;GO:0046949//fatty-acyl-CoA biosynthetic process	--
FBgn0001258	343	506	380	1134	987	870	14.296	21.27	17.115	43.093	37.941	36.718	17.5603	39.2507	1.1604	6.90902e-13	1.71594e-11	Ldh	Lactate dehydrogenase	Metabolism;Metabolism;Metabolism;Metabolism;Metabolism	Global and overview maps;Carbohydrate metabolism;Carbohydrate metabolism;Amino acid metabolism;Carbohydrate metabolism	ko01100//Metabolic pathways;ko00010//Glycolysis / Gluconeogenesis;ko00620//Pyruvate metabolism;ko00270//Cysteine and methionine metabolism;ko00640//Propanoate metabolism	K00016;K00016;K00016;K00016;K00016	GO:0005737//cytoplasm	GO:0003824//catalytic activity;GO:0004459//L-lactate dehydrogenase activity;GO:0016491//oxidoreductase activity;GO:0016616//oxidoreductase activity, acting on the CH-OH group of donors, NAD or NADP as acceptor	GO:0005975//carbohydrate metabolic process;GO:0019752//carboxylic acid metabolic process	--
FBgn0041087	954	887	803	405	448	424	27.821	25.988	25.395	10.813	12.069	12.614	26.4013	11.832	-1.15792	7.46313e-13	1.84652e-11	wun2	wunen-2	Metabolism;Metabolism;Metabolism;Metabolism;Metabolism	Global and overview maps;Lipid metabolism;Lipid metabolism;Lipid metabolism;Lipid metabolism	ko01100//Metabolic pathways;ko00564//Glycerophospholipid metabolism;ko00561//Glycerolipid metabolism;ko00600//Sphingolipid metabolism;ko00565//Ether lipid metabolism	K01080;K01080;K01080;K01080;K01080	GO:0005886//plasma membrane;GO:0005887//integral component of plasma membrane;GO:0045177//apical part of cell	GO:0005319//lipid transporter activity;GO:0008195//phosphatidate phosphatase activity;GO:0016791//phosphatase activity;GO:0042577//lipid phosphatase activity	GO:0006644//phospholipid metabolic process;GO:0007165//signal transduction;GO:0007277//pole cell development;GO:0007280//pole cell migration;GO:0007281//germ cell development;GO:0008354//germ cell migration;GO:0035233//germ cell repulsion;GO:0035234//ectopic germ cell programmed cell death;GO:0046839//phospholipid dephosphorylation	--
FBgn0031990	259	264	382	1208	1021	623	2.31	2.33	3.718	9.702	8.286	5.628	2.786	7.872	1.49853	7.64675e-13	1.8777e-11	PAPLA1	Phosphatidic Acid Phospholipase A1	-	-	-	-	GO:0005654//nucleoplasm;GO:0005737//cytoplasm;GO:0030134//COPII-coated ER to Golgi transport vesicle	GO:0004620//phospholipase activity;GO:0046872//metal ion binding	GO:0006888//endoplasmic reticulum to Golgi vesicle-mediated transport;GO:0007283//spermatogenesis;GO:0016063//rhodopsin biosynthetic process	--
FBgn0036685	1435	1410	1270	750	734	697	33.13	32.699	31.861	15.798	15.642	16.413	32.5633	15.951	-1.0296	7.69612e-13	1.88627e-11	CG6664	ACX54876.1 FI12105p [Drosophila melanogaster]	-	-	-	-	GO:0000793//condensed chromosome;GO:0000922//spindle pole	-	GO:0051296//establishment of meiotic spindle orientation	--
FBgn0031910	130	92	194	604	413	462	5.653	4.021	9.163	24.052	16.592	20.476	6.279	20.3733	1.69808	9.19656e-13	2.2372e-11	CG15818	NP_609116.1 uncharacterized protein Dmel_CG15818 [Drosophila melanogaster]	-	-	-	-	-	GO:0030246//carbohydrate binding	-	--
FBgn0010097	2254	2188	1781	995	1099	1106	84.852	82.938	72.665	34.354	38.171	42.251	80.1517	38.2587	-1.06695	9.76896e-13	2.37202e-11	gammaTub37C	gamma-Tubulin at 37C	Human Diseases	Infectious disease: viral	ko05165//Human papillomavirus infection	K10389	GO:0000930//gamma-tubulin complex;GO:0005634//nucleus;GO:0005737//cytoplasm;GO:0005813//centrosome;GO:0005819//spindle;GO:0005874//microtubule;GO:0072687//meiotic spindle	GO:0003924//GTPase activity;GO:0005200//structural constituent of cytoskeleton;GO:0005525//GTP binding	GO:0000070//mitotic sister chromatid segregation;GO:0000212//meiotic spindle organization;GO:0000226//microtubule cytoskeleton organization;GO:0000278//mitotic cell cycle;GO:0007017//microtubule-based process;GO:0007020//microtubule nucleation;GO:0007052//mitotic spindle organization;GO:0007057//spindle assembly involved in female meiosis I;GO:0007312//oocyte nucleus migration involved in oocyte …	--
FBgn0035544	34	44	46	237	224	133	1.272	1.654	1.869	8.117	7.739	5.069	1.59833	6.975	2.12562	1.07921e-12	2.60588e-11	CG15021	XP_043649151.1 basic proline-rich protein [Drosophila teissieri]	-	-	-	-	-	-	-	--
FBgn0050154	179	110	137	464	534	352	20.281	12.527	16.86	48.142	55.897	40.647	16.556	48.2287	1.54254	1.10497e-12	2.66315e-11	CG30154	NP_665881.1 uncharacterized protein Dmel_CG30154 [Drosophila melanogaster]	-	-	-	-	-	-	-	--
FBgn0001297	332	245	296	1023	810	595	5.427	4.041	5.081	15.946	12.582	10.116	4.84967	12.8813	1.40932	1.11026e-12	2.67097e-11	kay	kayak	Environmental Information Processing;Organismal Systems;Cellular Processes	Signal transduction;Immune system;Cell growth and death	ko04013//MAPK signaling pathway - fly;ko04624//Toll and Imd signaling pathway;ko04214//Apoptosis - fly	K09031;K09031;K09031	GO:0005634//nucleus;GO:0005654//nucleoplasm;GO:0005737//cytoplasm;GO:0035976//transcription factor AP-1 complex	GO:0000978//RNA polymerase II cis-regulatory region sequence-specific DNA binding;GO:0000981//DNA-binding transcription factor activity, RNA polymerase II-specific;GO:0001228//DNA-binding transcription activator activity, RNA polymerase II-specific;GO:0003677//DNA binding;GO:0003700//DNA-binding transcription factor activity;GO:0004674//protein serine/threonine kinase activity;GO:0043565//sequenc…	GO:0006355//regulation of transcription, DNA-templated;GO:0006357//regulation of transcription by RNA polymerase II;GO:0006964//positive regulation of biosynthetic process of antibacterial peptides active against Gram-negative bacteria;GO:0007163//establishment or maintenance of cell polarity;GO:0007281//germ cell development;GO:0007297//ovarian follicle cell migration;GO:0007391//dorsal closure;…	TF_bZIP
FBgn0035886	447	350	329	779	894	867	30.637	24.114	24.487	48.892	56.603	60.561	26.4127	55.352	1.06741	1.13613e-12	2.72817e-11	Jon66Ci	Jonah 66Ci	Environmental Information Processing;Organismal Systems;Organismal Systems;Human Diseases	Signaling molecules and interaction;Digestive system;Digestive system;Infectious disease: viral	ko04080//Neuroactive ligand-receptor interaction;ko04974//Protein digestion and absorption;ko04972//Pancreatic secretion;ko05164//Influenza A	K01312;K01312;K01312;K01312	-	GO:0004175//endopeptidase activity;GO:0004252//serine-type endopeptidase activity	GO:0006508//proteolysis	--
FBgn0262537	291	299	366	801	788	634	30.449	31.446	41.596	76.749	76.174	67.611	34.497	73.5113	1.0915	1.25681e-12	3.0069e-11	CG43091	AEH59631.1 MIP31877p, partial [Drosophila melanogaster]	-	-	-	-	-	-	-	--
FBgn0051075	4041	3712	3023	1509	2004	1716	142.065	131.166	115.432	48.563	65.088	61.484	129.554	58.3783	-1.15005	1.29411e-12	3.09047e-11	CG31075	NP_001247324.1 uncharacterized protein Dmel_CG31075, isoform B [Drosophila melanogaster]	Metabolism;Metabolism;Metabolism;Metabolism;Metabolism;Metabolism;Metabolism;Metabolism;Metabolism;Metabolism;Metabolism;Metabolism;Metabolism;Metabolism	Global and overview maps;Amino acid metabolism;Carbohydrate metabolism;Carbohydrate metabolism;Lipid metabolism;Carbohydrate metabolism;Amino acid metabolism;Lipid metabolism;Amino acid metabolism;Metabolism of other amino acids;Metabolism of terpenoids and polyketides;Amino acid metabolism;Metabolism of cofactors and vitamins;Amino acid metabolism	ko01100//Metabolic pathways;ko00330//Arginine and proline metabolism;ko00010//Glycolysis / Gluconeogenesis;ko00620//Pyruvate metabolism;ko00561//Glycerolipid metabolism;ko00053//Ascorbate and aldarate metabolism;ko00310//Lysine degradation;ko00071//Fatty acid degradation;ko00280//Valine, leucine and isoleucine degradation;ko00410//beta-Alanine metabolism;ko00981//Insect hormone biosynthesis;ko003…	K00128;K00128;K00128;K00128;K00128;K00128;K00128;K00128;K00128;K00128;K00128;K00128;K00128;K00128	GO:0005759//mitochondrial matrix	GO:0004029//aldehyde dehydrogenase (NAD+) activity;GO:0016491//oxidoreductase activity;GO:0016620//oxidoreductase activity, acting on the aldehyde or oxo group of donors, NAD or NADP as acceptor;GO:0043878//glyceraldehyde-3-phosphate dehydrogenase (NAD+) (non-phosphorylating) activity	GO:0006090//pyruvate metabolic process	--
FBgn0038179	192	246	284	690	563	582	13.667	17.601	21.958	44.977	37.024	42.223	17.742	41.408	1.22274	1.31835e-12	3.1426e-11	CG9312	NP_650313.1 uncharacterized protein Dmel_CG9312 [Drosophila melanogaster]	-	-	-	-	GO:0005634//nucleus	-	-	--
FBgn0038190	447	437	463	165	187	203	27.937	27.32	31.394	9.278	10.678	12.708	28.8837	10.888	-1.40751	1.40674e-12	3.34718e-11	CG9926	NP_001303460.1 uncharacterized protein Dmel_CG9926, isoform B [Drosophila melanogaster]	-	-	-	-	-	-	-	--
FBgn0028408	908	720	825	293	411	341	15.718	12.305	14.541	4.602	6.696	6.574	14.188	5.95733	-1.25193	1.423e-12	3.37969e-11	Drep2	DNA fragmentation factor-related protein 2	-	-	-	-	GO:0045211//postsynaptic membrane;GO:0097060//synaptic membrane	-	GO:0006915//apoptotic process;GO:0042981//regulation of apoptotic process;GO:0090305//nucleic acid phosphodiester bond hydrolysis;GO:1901215//negative regulation of neuron death	--
FBgn0038098	578	401	393	1116	958	1202	12.709	8.872	9.393	22.499	19.45	26.992	10.3247	22.9803	1.1543	1.58824e-12	3.76527e-11	CG7381	NP_650242.1 uncharacterized protein Dmel_CG7381, isoform A [Drosophila melanogaster]	-	-	-	-	GO:0016021//integral component of membrane	-	-	--
FBgn0000826	2342	1936	1420	665	882	813	120.768	100.342	79.532	31.401	42.018	42.727	100.214	38.7153	-1.37211	1.86357e-12	4.40999e-11	png	pan gu	-	-	-	-	GO:1902554//serine/threonine protein kinase complex;GO:1902911//protein kinase complex	GO:0004672//protein kinase activity;GO:0004674//protein serine/threonine kinase activity;GO:0005524//ATP binding	GO:0006468//protein phosphorylation;GO:0007343//egg activation;GO:0007346//regulation of mitotic cell cycle;GO:0045977//positive regulation of mitotic cell cycle, embryonic	--
FBgn0261616	284	247	306	640	759	574	41.725	36.437	48.618	85.039	102.707	85.241	42.26	90.9957	1.10651	2.13583e-12	5.02691e-11	CG42705	NP_001188557.1 uncharacterized protein Dmel_CG42705, isoform A [Drosophila melanogaster]	-	-	-	-	-	-	-	--
FBgn0029970	841	792	700	309	393	359	18.718	17.717	16.922	6.298	8.081	8.143	17.7857	7.50733	-1.24434	2.14209e-12	5.03257e-11	Nek2	Nek2	-	-	-	-	GO:0005634//nucleus;GO:0005737//cytoplasm;GO:0005813//centrosome;GO:0030496//midbody	GO:0004672//protein kinase activity;GO:0004674//protein serine/threonine kinase activity;GO:0005524//ATP binding	GO:0001751//compound eye photoreceptor cell differentiation;GO:0006468//protein phosphorylation;GO:0007059//chromosome segregation;GO:0007088//regulation of mitotic nuclear division;GO:0090263//positive regulation of canonical Wnt signaling pathway	--
FBgn0015371	1420	1055	1043	385	593	406	16.013	11.984	12.652	3.94	6.201	4.669	13.5497	4.93667	-1.45665	2.15492e-12	5.05361e-11	chn	charlatan	-	-	-	-	GO:0005634//nucleus	GO:0000981//DNA-binding transcription factor activity, RNA polymerase II-specific;GO:0001227//DNA-binding transcription repressor activity, RNA polymerase II-specific;GO:0043565//sequence-specific DNA binding;GO:0046872//metal ion binding	GO:0000122//negative regulation of transcription by RNA polymerase II;GO:0001654//eye development;GO:0001700//embryonic development via the syncytial blastoderm;GO:0006355//regulation of transcription, DNA-templated;GO:0007422//peripheral nervous system development;GO:0007423//sensory organ development;GO:0007458//progression of morphogenetic furrow involved in compound eye morphogenesis;GO:00075…	zf-C2H2
FBgn0040347	895	806	708	270	400	331	23.861	21.601	20.49	6.59	9.858	8.998	21.984	8.482	-1.37398	2.16028e-12	5.05708e-11	mus81	mus81	Genetic Information Processing;Genetic Information Processing	Replication and repair;Replication and repair	ko03460//Fanconi anemia pathway;ko03440//Homologous recombination	K08991;K08991	GO:0005634//nucleus;GO:0048476//Holliday junction resolvase complex	GO:0003677//DNA binding;GO:0004518//nuclease activity;GO:0008821//crossover junction endodeoxyribonuclease activity;GO:0048257//3'-flap endonuclease activity	GO:0000712//resolution of meiotic recombination intermediates;GO:0000727//double-strand break repair via break-induced replication;GO:0000737//DNA catabolic process, endonucleolytic;GO:0006281//DNA repair;GO:0006302//double-strand break repair;GO:0031573//mitotic intra-S DNA damage checkpoint signaling	--
FBgn0000927	9123	7934	5669	2767	3674	3592	234.483	204.965	158.259	65.124	87.24	94.093	199.236	82.1523	-1.2781	2.23964e-12	5.2241e-11	fs(1)Ya	female sterile (1) Young arrest	-	-	-	-	GO:0005635//nuclear envelope;GO:0005652//nuclear lamina;GO:0005654//nucleoplasm;GO:0005737//cytoplasm	-	GO:0000278//mitotic cell cycle;GO:0006260//DNA replication;GO:0006333//chromatin assembly or disassembly;GO:0006997//nucleus organization;GO:0007344//pronuclear fusion;GO:0030261//chromosome condensation;GO:0051301//cell division	--
FBgn0013323	41	37	35	164	160	150	2.511	2.137	2.465	8.768	8.476	8.836	2.371	8.69333	1.87441	2.35193e-12	5.47621e-11	Ptth	Prothoracicotropic hormone	-	-	-	-	GO:0005576//extracellular region;GO:0043196//varicosity	GO:0005102//signaling receptor binding;GO:0005125//cytokine activity;GO:0018445//prothoracicotrophic hormone activity	GO:0007552//metamorphosis;GO:0008293//torso signaling pathway;GO:0044060//regulation of endocrine process;GO:0045998//positive regulation of ecdysteroid biosynthetic process;GO:0046957//negative phototaxis	--
FBgn0029879	2481	2301	2237	986	1388	1118	63.591	59.304	62.296	23.156	32.861	29.2	61.7303	28.4057	-1.1198	2.55859e-12	5.91514e-11	APC7	Anaphase Promoting Complex subunit 7	Genetic Information Processing	Folding, sorting and degradation	ko04120//Ubiquitin mediated proteolysis	K03354	GO:0005680//anaphase-promoting complex;GO:0005737//cytoplasm	GO:0005515//protein binding	GO:0007091//metaphase/anaphase transition of mitotic cell cycle;GO:0016567//protein ubiquitination;GO:0031145//anaphase-promoting complex-dependent catabolic process;GO:0045842//positive regulation of mitotic metaphase/anaphase transition;GO:0051301//cell division	--
FBgn0005612	92	107	64	343	306	249	1.662	2.259	1.518	5.708	4.896	4.502	1.813	5.03533	1.47371	2.78463e-12	6.40366e-11	Sox14	Sox box protein 14	Human Diseases	Cancer: overview	ko05206//MicroRNAs in cancer	K23581	GO:0005634//nucleus;GO:0005667//transcription regulator complex	GO:0000981//DNA-binding transcription factor activity, RNA polymerase II-specific;GO:0003677//DNA binding;GO:0008301//DNA binding, bending;GO:0043565//sequence-specific DNA binding	GO:0006355//regulation of transcription, DNA-templated;GO:0006357//regulation of transcription by RNA polymerase II;GO:0007552//metamorphosis;GO:0009653//anatomical structure morphogenesis;GO:0016322//neuron remodeling;GO:0030154//cell differentiation;GO:0048813//dendrite morphogenesis;GO:1904799//regulation of neuron remodeling;GO:1904801//positive regulation of neuron remodeling	HMG
FBgn0000568	135	84	135	453	362	321	1.863	1.109	1.865	5.619	4.705	4.557	1.61233	4.96033	1.62129	2.7954e-12	6.41711e-11	Eip75B	Ecdysone-induced protein 75B	-	-	-	-	GO:0005634//nucleus;GO:0042025//host cell nucleus;GO:0090575//RNA polymerase II transcription regulator complex	GO:0000977//RNA polymerase II transcription regulatory region sequence-specific DNA binding;GO:0003677//DNA binding;GO:0003700//DNA-binding transcription factor activity;GO:0004879//nuclear receptor activity;GO:0008134//transcription factor binding;GO:0008270//zinc ion binding;GO:0020037//heme binding;GO:0038023//signaling receptor activity;GO:0043565//sequence-specific DNA binding;GO:0046872//me…	GO:0000122//negative regulation of transcription by RNA polymerase II;GO:0006355//regulation of transcription, DNA-templated;GO:0007275//multicellular organism development;GO:0007553//regulation of ecdysteroid metabolic process;GO:0007591//molting cycle, chitin-based cuticle;GO:0009755//hormone-mediated signaling pathway;GO:0010468//regulation of gene expression;GO:0018990//ecdysis, chitin-based …	THR-like
FBgn0030928	458	349	277	1026	912	800	32.007	24.514	21.026	65.658	58.881	56.979	25.849	60.506	1.22697	2.90196e-12	6.61516e-11	CG15044	NP_573299.1 uncharacterized protein Dmel_CG15044 [Drosophila melanogaster]	-	-	-	-	-	-	-	--
FBgn0032638	127	49	148	1226	828	1219	4.597	1.783	5.819	40.637	27.689	44.97	4.06633	37.7653	3.21526	3.15681e-12	7.17102e-11	SPH93	Serine protease homolog 93	-	-	-	-	GO:0005615//extracellular space	GO:0004252//serine-type endopeptidase activity	GO:0006508//proteolysis;GO:0050830//defense response to Gram-positive bacterium	--
FBgn0030805	1231	1032	900	375	494	506	37.844	31.829	29.756	10.474	13.976	15.822	33.143	13.424	-1.30389	3.44065e-12	7.78866e-11	wus	wurst	-	-	-	-	GO:0005769//early endosome;GO:0005886//plasma membrane;GO:0016021//integral component of membrane;GO:0031410//cytoplasmic vesicle	-	GO:0006897//endocytosis;GO:0030198//extracellular matrix organization;GO:0035002//liquid clearance, open tracheal system;GO:0035159//regulation of tube length, open tracheal system	--
FBgn0033340	197	176	226	500	508	440	30.018	26.955	37.403	69.766	71.512	68.33	31.4587	69.8693	1.1512	3.74849e-12	8.45614e-11	CG13751	NP_610416.1 uncharacterized protein Dmel_CG13751 [Drosophila melanogaster]	-	-	-	-	-	-	-	--
FBgn0039239	33	58	57	230	245	163	3.498	6.179	6.562	22.322	23.989	17.607	5.413	21.306	1.97676	4.05946e-12	9.07883e-11	CG13641	NP_651302.1 uncharacterized protein Dmel_CG13641 [Drosophila melanogaster]	-	-	-	-	-	-	-	--
FBgn0053329	316	279	228	796	648	584	10.799	9.583	8.463	24.909	20.458	20.34	9.615	21.9023	1.18773	4.06314e-12	9.07883e-11	Sp212	Serine-peptidase 212	-	-	-	-	-	GO:0004252//serine-type endopeptidase activity	GO:0006508//proteolysis;GO:0009617//response to bacterium;GO:0009620//response to fungus	--
FBgn0083970	79	63	59	207	301	217	9.357	7.5	7.59	22.451	32.937	26.195	8.149	27.1943	1.73861	4.06629e-12	9.07883e-11	CG34134	AFE85384.1 FI19808p1, partial [Drosophila melanogaster]	-	-	-	-	-	-	-	--
FBgn0034330	228	142	172	492	577	439	46.61	29.177	38.191	92.103	108.974	91.465	37.9927	97.514	1.35989	4.0838e-12	9.10234e-11	BomS4	Bomanin Short 4	Organismal Systems	Immune system	ko04624//Toll and Imd signaling pathway	K20695	GO:0005576//extracellular region	-	GO:0006952//defense response	--
FBgn0085455	96	117	194	540	393	439	5.396	6.61	11.844	27.794	20.408	25.148	7.95	24.45	1.62081	4.65562e-12	1.03415e-10	CG34426	AAY54944.1 IP11847p, partial [Drosophila melanogaster]	-	-	-	-	GO:0005576//extracellular region	GO:0008061//chitin binding	-	--
FBgn0051469	78	114	127	341	297	338	7.309	10.738	12.927	29.262	25.713	32.282	10.3247	29.0857	1.49421	4.72967e-12	1.04703e-10	CG31469	AAY54706.1 IP04682p, partial [Drosophila melanogaster]	Metabolism;Metabolism;Metabolism	Global and overview maps;Metabolism of cofactors and vitamins;Metabolism of cofactors and vitamins	ko01100//Metabolic pathways;ko00730//Thiamine metabolism;ko00740//Riboflavin metabolism	K14394;K14394;K14394	GO:0005737//cytoplasm;GO:0070062//extracellular exosome	GO:0003993//acid phosphatase activity;GO:0004725//protein tyrosine phosphatase activity;GO:0098627//protein arginine phosphatase activity	GO:0006470//protein dephosphorylation;GO:0098628//peptidyl-N-phospho-arginine dephosphorylation	--
FBgn0033397	7	10	13	127	97	66	0.241	0.346	0.487	4.008	3.088	2.318	0.358	3.138	3.13181	4.76672e-12	1.05345e-10	Cyp4p3	Cyp4p3	-	-	-	-	GO:0005789//endoplasmic reticulum membrane	GO:0004497//monooxygenase activity;GO:0005506//iron ion binding;GO:0016705//oxidoreductase activity, acting on paired donors, with incorporation or reduction of molecular oxygen;GO:0020037//heme binding	-	--
MSTRG.6046	17	13	3	124	178	71	4.495	3.449	0.807	29.332	42.617	18.766	2.917	30.2383	3.37382	5.11107e-12	1.12764e-10	--	-	-	-	-	-	-	-	-	--
FBgn0263143	887	883	867	384	489	413	21.887	21.9	23.237	8.677	11.148	10.386	22.3413	10.0703	-1.1496	5.16663e-12	1.13797e-10	vret	vreteno	-	-	-	-	GO:0005737//cytoplasm;GO:0043186//P granule;GO:0070725//Yb body	-	GO:0007293//germarium-derived egg chamber formation;GO:0010526//negative regulation of transposition, RNA-mediated;GO:0034587//piRNA metabolic process;GO:0048477//oogenesis;GO:0051321//meiotic cell cycle;GO:0060966//regulation of gene silencing by RNA	--
FBgn0016081	1165	1074	769	2470	2512	1861	6.072	5.563	4.33	11.712	11.968	9.799	5.32167	11.1597	1.06834	5.29946e-12	1.16525e-10	fry	furry	-	-	-	-	GO:0005737//cytoplasm;GO:0005938//cell cortex;GO:0030424//axon;GO:0030425//dendrite;GO:0030427//site of polarized growth;GO:0044297//cell body;GO:0045177//apical part of cell	-	GO:0000902//cell morphogenesis;GO:0007476//imaginal disc-derived wing morphogenesis;GO:0008407//chaeta morphogenesis;GO:0031175//neuron projection development;GO:0035316//non-sensory hair organization;GO:0035317//imaginal disc-derived wing hair organization;GO:0042052//rhabdomere development;GO:0045860//positive regulation of protein kinase activity;GO:0045893//positive regulation of transcriptio…	--
FBgn0036196	251	282	315	766	705	550	5.755	6.512	7.911	15.841	14.706	12.731	6.726	14.426	1.10085	5.91181e-12	1.28903e-10	CG11658	XP_002030158.1 F-box only protein 32 [Drosophila sechellia]	Environmental Information Processing	Signal transduction	ko04068//FoxO signaling pathway	K10305	GO:0005634//nucleus;GO:0019005//SCF ubiquitin ligase complex	GO:0005515//protein binding	GO:0016567//protein ubiquitination;GO:0031146//SCF-dependent proteasomal ubiquitin-dependent protein catabolic process	--
FBgn0033574	109	97	127	393	365	261	4.635	4.079	5.865	15.045	14.337	11.239	4.85967	13.5403	1.47833	6.28942e-12	1.3668e-10	Spn47C	Serpin 47C	-	-	-	-	GO:0005615//extracellular space	GO:0004867//serine-type endopeptidase inhibitor activity	GO:0010951//negative regulation of endopeptidase activity;GO:0032504//multicellular organism reproduction	--
FBgn0024177	2012	1757	1969	1055	1114	923	79.436	69.723	84.435	38.142	40.633	37.14	77.8647	38.6383	-1.01094	6.70185e-12	1.45158e-10	zpg	zero population growth	-	-	-	-	GO:0005886//plasma membrane;GO:0005921//gap junction;GO:0016021//integral component of membrane	GO:0005243//gap junction channel activity;GO:0055077//gap junction hemi-channel activity	GO:0006811//ion transport;GO:0007281//germ cell development;GO:0007283//spermatogenesis;GO:0007602//phototransduction;GO:0010496//intercellular transport;GO:0036098//male germ-line stem cell population maintenance	--
FBgn0267339	343	273	289	618	723	652	16.642	13.313	15.229	27.457	32.407	32.24	15.0613	30.7013	1.02745	6.78673e-12	1.46753e-10	p38c	p38c MAP kinase	Environmental Information Processing;Organismal Systems;Environmental Information Processing	Signal transduction;Immune system;Signal transduction	ko04013//MAPK signaling pathway - fly;ko04624//Toll and Imd signaling pathway;ko04068//FoxO signaling pathway	K04441;K04441;K04441	GO:0005634//nucleus;GO:0005737//cytoplasm	GO:0004672//protein kinase activity;GO:0004707//MAP kinase activity;GO:0005524//ATP binding	GO:0006468//protein phosphorylation;GO:0009617//response to bacterium;GO:0010468//regulation of gene expression;GO:0010883//regulation of lipid storage;GO:0035556//intracellular signal transduction;GO:0038066//p38MAPK cascade;GO:0048082//regulation of adult chitin-containing cuticle pigmentation;GO:1902882//regulation of response to oxidative stress	--
FBgn0266431	20	16	25	145	108	107	2.33	1.874	3.164	15.472	11.626	12.707	2.456	13.2683	2.4336	6.97836e-12	1.50647e-10	CG45061	NP_001285063.1 uncharacterized protein Dmel_CG45061 [Drosophila melanogaster]	-	-	-	-	-	-	-	--
FBgn0041171	8864	7000	6067	3195	3949	3718	95.737	75.918	71.113	31.569	39.393	40.91	80.9227	37.2907	-1.11773	7.07671e-12	1.52495e-10	ago	archipelago	Genetic Information Processing	Folding, sorting and degradation	ko04120//Ubiquitin mediated proteolysis	K10260	GO:0005634//nucleus;GO:0019005//SCF ubiquitin ligase complex	GO:0005515//protein binding;GO:0030332//cyclin binding;GO:1990381//ubiquitin-specific protease binding	GO:0007088//regulation of mitotic nuclear division;GO:0007096//regulation of exit from mitosis;GO:0007419//ventral cord development;GO:0016567//protein ubiquitination;GO:0030162//regulation of proteolysis;GO:0031146//SCF-dependent proteasomal ubiquitin-dependent protein catabolic process;GO:0035147//branch fusion, open tracheal system;GO:0042023//DNA endoreduplication;GO:0045571//negative regulat…	--
FBgn0034650	1211	1053	979	496	580	539	56.329	49.23	49.46	21.126	24.924	25.552	51.673	23.8673	-1.11437	7.08734e-12	1.52495e-10	NC2alpha	Negative Cofactor 2alpha	-	-	-	-	GO:0005634//nucleus	GO:0000978//RNA polymerase II cis-regulatory region sequence-specific DNA binding;GO:0001046//core promoter sequence-specific DNA binding;GO:0003712//transcription coregulator activity;GO:0008134//transcription factor binding;GO:0046982//protein heterodimerization activity	GO:0000122//negative regulation of transcription by RNA polymerase II;GO:0006355//regulation of transcription, DNA-templated;GO:0045892//negative regulation of transcription, DNA-templated;GO:0045893//positive regulation of transcription, DNA-templated;GO:0045944//positive regulation of transcription by RNA polymerase II	--
FBgn0039527	143	111	70	346	361	351	1.611	1.257	0.857	3.569	3.757	4.03	1.24167	3.78533	1.60814	8.46712e-12	1.80397e-10	CG5639	NP_651570.1 uncharacterized protein Dmel_CG5639 [Drosophila melanogaster]	-	-	-	-	GO:0005576//extracellular region;GO:0005615//extracellular space;GO:0016021//integral component of membrane	GO:0004857//enzyme inhibitor activity;GO:0004867//serine-type endopeptidase inhibitor activity;GO:0030414//peptidase inhibitor activity	-	--
FBgn0052284	74	41	80	210	268	266	9.302	5.18	10.922	24.172	31.122	34.077	8.468	29.7903	1.81475	9.35524e-12	1.98346e-10	CG32284	NP_728826.1 uncharacterized protein Dmel_CG32284 [Drosophila melanogaster]	-	-	-	-	GO:0005576//extracellular region	GO:0008061//chitin binding	-	--
FBgn0039026	294	252	248	702	640	516	2.544	2.242	2.353	5.616	5.118	4.564	2.37967	5.09933	1.09955	9.39271e-12	1.98817e-10	CG7029	NP_788719.1 uncharacterized protein Dmel_CG7029, isoform A [Drosophila melanogaster]	-	-	-	-	-	GO:0008157//protein phosphatase 1 binding	-	--
FBgn0050090	206	145	166	494	460	391	11.845	8.38	10.368	26.012	24.437	22.914	10.1977	24.4543	1.26185	1.00072e-11	2.1148e-10	CG30090	NP_725487.1 uncharacterized protein Dmel_CG30090 [Drosophila melanogaster]	-	-	-	-	-	GO:0004252//serine-type endopeptidase activity	GO:0006508//proteolysis	--
FBgn0051676	251	324	278	603	667	608	13.574	17.249	16.171	29.961	33.444	33.583	15.6647	32.3293	1.04533	1.02326e-11	2.15895e-10	CG31676	NP_001286113.1 uncharacterized protein Dmel_CG31676, isoform B [Drosophila melanogaster]	-	-	-	-	-	-	GO:0030431//sleep;GO:0032222//regulation of synaptic transmission, cholinergic;GO:1903818//positive regulation of voltage-gated potassium channel activity	--
FBgn0031875	2082	1691	1685	834	1042	892	60.619	49.486	53.286	22.236	28.028	26.469	54.4637	25.5777	-1.09041	1.04064e-11	2.19206e-10	CG3430	NP_542438.1 uncharacterized protein Dmel_CG3430 [Drosophila melanogaster]	-	-	-	-	-	GO:0003682//chromatin binding	GO:0006261//DNA-dependent DNA replication;GO:0007049//cell cycle;GO:0051301//cell division	--
FBgn0031220	866	1138	1417	2849	2658	2199	18.719	25.194	33.626	56.015	52.619	48.427	25.8463	52.3537	1.01833	1.07465e-11	2.25642e-10	CG4822	NP_001033861.1 uncharacterized protein Dmel_CG4822, isoform E [Drosophila melanogaster]	Environmental Information Processing;Human Diseases	Membrane transport;Cardiovascular disease	ko02010//ABC transporters;ko05417//Lipid and atherosclerosis	K05679;K05679	GO:0005886//plasma membrane;GO:0016020//membrane;GO:0016021//integral component of membrane	GO:0005524//ATP binding;GO:0016887//ATP hydrolysis activity;GO:0042626//ATPase-coupled transmembrane transporter activity;GO:0140359//ABC-type transporter activity	GO:0055085//transmembrane transport	--
FBgn0032354	487	471	386	147	200	179	23.241	22.662	19.915	6.409	8.775	8.733	21.9393	7.97233	-1.46045	1.07804e-11	2.25991e-10	CG4788	NP_001285838.1 uncharacterized protein Dmel_CG4788, isoform B [Drosophila melanogaster]	-	-	-	-	-	-	-	--
FBgn0039290	56	97	54	299	268	215	0.866	1.524	0.911	4.254	3.847	3.424	1.10033	3.84167	1.80379	1.11784e-11	2.33958e-10	CG13654	NP_651350.2 uncharacterized protein Dmel_CG13654, isoform A [Drosophila melanogaster]	-	-	-	-	GO:0005886//plasma membrane;GO:0016021//integral component of membrane	-	-	--
FBgn0016034	1153	1092	1144	559	653	595	36.267	34.472	39.012	16.103	19.011	19.115	36.5837	18.0763	-1.0171	1.17313e-11	2.45135e-10	mael	maelstrom	-	-	-	-	GO:0005634//nucleus;GO:0005737//cytoplasm;GO:0043186//P granule;GO:0048471//perinuclear region of cytoplasm	GO:0000976//transcription cis-regulatory region binding;GO:0003677//DNA binding;GO:0043565//sequence-specific DNA binding	GO:0007010//cytoskeleton organization;GO:0007140//male meiotic nuclear division;GO:0007275//multicellular organism development;GO:0007283//spermatogenesis;GO:0007314//oocyte anterior/posterior axis specification;GO:0007317//regulation of pole plasm oskar mRNA localization;GO:0008104//protein localization;GO:0008298//intracellular mRNA localization;GO:0009950//dorsal/ventral axis specification;GO:…	--
FBgn0038820	1862	2293	1768	1028	1092	974	107.07	132.527	110.422	54.13	58.011	57.081	116.673	56.4073	-1.04852	1.18676e-11	2.47587e-10	CG4000	NP_650906.1 uncharacterized protein Dmel_CG4000 [Drosophila melanogaster]	-	-	-	-	-	-	-	--
FBgn0052698	266	278	349	810	694	596	7.942	8.621	11.382	22.342	19.352	18.74	9.315	20.1447	1.11277	1.2007e-11	2.49696e-10	CARPB	Carbonic anhydrase-related protein B	-	-	-	-	-	GO:0004089//carbonate dehydratase activity;GO:0008270//zinc ion binding;GO:0016836//hydro-lyase activity	GO:0006730//one-carbon metabolic process	--
FBgn0029924	4662	3890	2788	1310	1668	1877	119.557	100.269	77.657	30.764	39.519	49.058	99.161	39.7803	-1.31772	1.31073e-11	2.7171e-10	CG4586	NP_572371.1 uncharacterized protein Dmel_CG4586 [Drosophila melanogaster]	Metabolism;Metabolism;Cellular Processes;Metabolism;Metabolism;Metabolism;Metabolism;Metabolism;Metabolism	Global and overview maps;Global and overview maps;Transport and catabolism;Global and overview maps;Lipid metabolism;Lipid metabolism;Metabolism of other amino acids;Carbohydrate metabolism;Lipid metabolism	ko01100//Metabolic pathways;ko01200//Carbon metabolism;ko04146//Peroxisome;ko01212//Fatty acid metabolism;ko01040//Biosynthesis of unsaturated fatty acids;ko00071//Fatty acid degradation;ko00410//beta-Alanine metabolism;ko00640//Propanoate metabolism;ko00592//alpha-Linolenic acid metabolism	K00232;K00232;K00232;K00232;K00232;K00232;K00232;K00232;K00232	GO:0005777//peroxisome	GO:0003997//acyl-CoA oxidase activity;GO:0005504//fatty acid binding;GO:0016627//oxidoreductase activity, acting on the CH-CH group of donors;GO:0050660//flavin adenine dinucleotide binding;GO:0071949//FAD binding	GO:0006631//fatty acid metabolic process;GO:0006635//fatty acid beta-oxidation;GO:0033540//fatty acid beta-oxidation using acyl-CoA oxidase;GO:0055088//lipid homeostasis	--
FBgn0027500	7652	6445	5264	2456	3398	3314	119.254	100.956	89.104	35.05	48.924	52.637	103.105	45.537	-1.179	1.40307e-11	2.9039e-10	spd-2	spindle defective 2	-	-	-	-	GO:0000242//pericentriolar material;GO:0005739//mitochondrion;GO:0005813//centrosome;GO:0005814//centriole	GO:0043262//adenosine-diphosphatase activity;GO:0047631//ADP-ribose diphosphatase activity;GO:0102485//dATP phosphohydrolase activity;GO:0102486//dCTP phosphohydrolase activity;GO:0102487//dUTP phosphohydrolase activity;GO:0102488//dTTP phosphohydrolase activity;GO:0102489//GTP phosphohydrolase activity;GO:0102490//8-oxo-dGTP phosphohydrolase activity;GO:0102491//dGTP phosphohydrolase activity	GO:0007098//centrosome cycle;GO:0030953//astral microtubule organization;GO:0035044//sperm aster formation	--
FBgn0259745	1669	1238	1192	534	701	628	25.562	18.865	19.197	6.951	9.117	9.655	21.208	8.57433	-1.30651	1.44784e-11	2.98236e-10	wech	wech	Organismal Systems;Human Diseases	Development and regeneration;Cancer: overview	ko04361//Axon regeneration;ko05206//MicroRNAs in cancer	K12035;K12035	GO:0005927//muscle tendon junction	GO:0005515//protein binding;GO:0008270//zinc ion binding;GO:0030371//translation repressor activity;GO:0030674//protein-macromolecule adaptor activity	GO:0002168//instar larval development;GO:0016203//muscle attachment;GO:0017148//negative regulation of translation;GO:0030154//cell differentiation;GO:0033632//regulation of cell-cell adhesion mediated by integrin	--
FBgn0039638	548	489	449	209	212	231	14.335	12.857	12.757	5.006	5.123	6.159	13.3163	5.42933	-1.29435	1.45211e-11	2.98644e-10	dgt6	dim gamma-tubulin 6	-	-	-	-	GO:0000922//spindle pole;GO:0005737//cytoplasm;GO:0005815//microtubule organizing center;GO:0005819//spindle;GO:0005874//microtubule;GO:0070652//HAUS complex	-	GO:0007052//mitotic spindle organization;GO:0007088//regulation of mitotic nuclear division;GO:0051225//spindle assembly;GO:0051301//cell division	--
FBgn0259237	1451	1044	779	2598	2715	2413	29.918	21.636	17.446	49.054	51.718	50.708	23	50.4933	1.13446	1.55766e-11	3.19847e-10	CG42335	-	-	-	-	-	GO:0005737//cytoplasm	GO:0008237//metallopeptidase activity;GO:0008270//zinc ion binding;GO:0042277//peptide binding;GO:0070006//metalloaminopeptidase activity	GO:0006508//proteolysis;GO:0043171//peptide catabolic process	--
FBgn0038277	42093	38696	28353	17447	19838	18835	2765.2	2555.06	2022.78	1049.44	1203.8	1260.97	2447.68	1171.4	-1.06318	1.5778e-11	3.23071e-10	RpS5b	Ribosomal protein S5b	Genetic Information Processing	Translation	ko03010//Ribosome	K02989	GO:0005840//ribosome;GO:0015935//small ribosomal subunit;GO:0022627//cytosolic small ribosomal subunit	GO:0003723//RNA binding;GO:0003729//mRNA binding;GO:0003735//structural constituent of ribosome;GO:0019843//rRNA binding	GO:0000028//ribosomal small subunit assembly;GO:0002181//cytoplasmic translation;GO:0006412//translation	--
FBgn0037467	335	444	368	888	894	726	7.529	10.04	9.034	18.31	18.473	16.66	8.86767	17.8143	1.00641	1.57831e-11	3.23071e-10	Ufl1	UFM1 specific ligase 1	-	-	-	-	GO:0005789//endoplasmic reticulum membrane;GO:0012505//endomembrane system	GO:0016874//ligase activity;GO:0061666//UFM1 ligase activity;GO:0071568//UFM1 transferase activity	GO:0032434//regulation of proteasomal ubiquitin-dependent protein catabolic process;GO:0034976//response to endoplasmic reticulum stress;GO:0071569//protein ufmylation;GO:1990592//protein K69-linked ufmylation	--
FBgn0054003	203	163	148	503	508	366	25.024	20.196	19.816	56.78	57.854	45.983	21.6787	53.539	1.30431	1.60409e-11	3.27832e-10	NimB3	Nimrod B3	-	-	-	-	GO:0005576//extracellular region	-	GO:0042742//defense response to bacterium	--
FBgn0028554	2839	2306	2185	1105	1410	1206	95.436	77.866	79.752	34.038	43.766	41.347	84.3513	39.717	-1.08665	1.69709e-11	3.46296e-10	x16	x16 splicing factor	Genetic Information Processing	Transcription	ko03040//Spliceosome	K12896	GO:0005634//nucleus;GO:0016607//nuclear speck;GO:0071011//precatalytic spliceosome;GO:0071013//catalytic step 2 spliceosome	GO:0003676//nucleic acid binding;GO:0003723//RNA binding;GO:0003729//mRNA binding;GO:0008270//zinc ion binding	GO:0000381//regulation of alternative mRNA splicing, via spliceosome;GO:0000398//mRNA splicing, via spliceosome;GO:0001178//regulation of transcriptional start site selection at RNA polymerase II promoter;GO:0008380//RNA splicing;GO:0010468//regulation of gene expression;GO:0031440//regulation of mRNA 3'-end processing;GO:0045292//mRNA cis splicing, via spliceosome	--
FBgn0005654	1904	1676	1278	760	819	750	45.103	39.809	32.839	16.471	17.938	18.122	39.2503	17.5103	-1.1645	1.98426e-11	4.0175e-10	Orc3	Origin recognition complex subunit 3	Cellular Processes	Cell growth and death	ko04110//Cell cycle	K02605	GO:0005656//nuclear pre-replicative complex;GO:0005664//nuclear origin of replication recognition complex;GO:0031261//DNA replication preinitiation complex	GO:0003677//DNA binding;GO:0003688//DNA replication origin binding	GO:0006260//DNA replication;GO:0006267//pre-replicative complex assembly involved in nuclear cell cycle DNA replication;GO:0006270//DNA replication initiation;GO:0007611//learning or memory;GO:0007612//learning;GO:0008355//olfactory learning;GO:0030536//larval feeding behavior;GO:1903688//positive regulation of border follicle cell migration	--
FBgn0031540	680	670	674	324	362	307	15.446	15.296	16.628	6.739	7.597	7.107	15.79	7.14767	-1.14347	1.9887e-11	4.02027e-10	Pif1	Pif1 DNA helicase	-	-	-	-	GO:0005634//nucleus;GO:0005657//replication fork;GO:0005739//mitochondrion	GO:0003677//DNA binding;GO:0003678//DNA helicase activity;GO:0005524//ATP binding;GO:0043139//5'-3' DNA helicase activity	GO:0000002//mitochondrial genome maintenance;GO:0000723//telomere maintenance;GO:0000724//double-strand break repair via homologous recombination;GO:0000727//double-strand break repair via break-induced replication;GO:0006260//DNA replication;GO:0006281//DNA repair;GO:0032508//DNA duplex unwinding	--
FBgn0032297	409	506	731	1616	1333	1191	17.859	23.004	35.17	65.201	53.367	53.693	25.3443	57.4203	1.1799	2.01702e-11	4.07119e-10	CG17124	NP_001285813.1 uncharacterized protein Dmel_CG17124, isoform C [Drosophila melanogaster]	-	-	-	-	GO:0005737//cytoplasm	GO:0004865//protein serine/threonine phosphatase inhibitor activity	GO:0042325//regulation of phosphorylation	--
FBgn0015553	726	623	737	306	367	297	17.45	15.051	19.24	6.735	8.149	7.275	17.247	7.38633	-1.22342	2.02906e-11	4.08916e-10	tos	tosca	Genetic Information Processing	Replication and repair	ko03430//Mismatch repair	K10746	GO:0005634//nucleus	GO:0003677//DNA binding;GO:0003824//catalytic activity;GO:0004518//nuclease activity;GO:0008409//5'-3' exonuclease activity;GO:0016788//hydrolase activity, acting on ester bonds;GO:0017108//5'-flap endonuclease activity;GO:0035312//5'-3' exodeoxyribonuclease activity;GO:0045145//single-stranded DNA 5'-3' exodeoxyribonuclease activity;GO:0046872//metal ion binding;GO:0048256//flap endonuclease act…	GO:0006281//DNA repair;GO:0006298//mismatch repair;GO:0006310//DNA recombination	--
FBgn0283531	2205	1934	1373	724	911	820	23.839	21.046	16.148	7.17	9.1	9.05	20.3443	8.44	-1.26931	2.03764e-11	4.10013e-10	Duox	Dual oxidase	Environmental Information Processing;Organismal Systems	Signal transduction;Immune system	ko04013//MAPK signaling pathway - fly;ko04624//Toll and Imd signaling pathway	K13411;K13411	GO:0005886//plasma membrane;GO:0012505//endomembrane system;GO:0016021//integral component of membrane;GO:0043020//NADPH oxidase complex	GO:0004601//peroxidase activity;GO:0005509//calcium ion binding;GO:0016174//NAD(P)H oxidase H2O2-forming activity;GO:0016175//superoxide-generating NAD(P)H oxidase activity;GO:0016491//oxidoreductase activity;GO:0020037//heme binding	GO:0002385//mucosal immune response;GO:0006952//defense response;GO:0006979//response to oxidative stress;GO:0007476//imaginal disc-derived wing morphogenesis;GO:0008365//adult chitin-based cuticle development;GO:0009611//response to wounding;GO:0019221//cytokine-mediated signaling pathway;GO:0035220//wing disc development;GO:0042335//cuticle development;GO:0042554//superoxide anion generation;GO…	--
FBgn0005596	3492	3095	2469	1342	1677	1510	47.322	42.156	36.341	16.653	20.995	20.855	41.9397	19.501	-1.10477	2.10222e-11	4.21058e-10	yem	yemanuclein	-	-	-	-	GO:0000776//kinetochore;GO:0001940//male pronucleus;GO:0005634//nucleus;GO:0005654//nucleoplasm;GO:0042585//germinal vesicle	GO:0003677//DNA binding	GO:0007143//female meiotic nuclear division;GO:0035042//fertilization, exchange of chromosomal proteins	--
FBgn0001224	312	204	148	909	679	550	20.371	13.618	10.739	54.577	41.33	36.705	14.9093	44.204	1.56796	2.14303e-11	4.28574e-10	Hsp23	Heat shock protein 23	-	-	-	-	-	GO:0051082//unfolded protein binding	GO:0001666//response to hypoxia;GO:0009408//response to heat;GO:0009631//cold acclimation;GO:0042026//protein refolding;GO:0061077//chaperone-mediated protein folding	--
FBgn0039656	37	58	79	249	233	199	0.78	1.228	1.808	4.805	4.536	4.274	1.272	4.53833	1.83506	2.24691e-11	4.47289e-10	CG11951	-	Metabolism;Metabolism	Global and overview maps;Metabolism of other amino acids	ko01100//Metabolic pathways;ko00480//Glutathione metabolism	K11140;K11140	GO:0005737//cytoplasm	GO:0008237//metallopeptidase activity;GO:0008270//zinc ion binding;GO:0042277//peptide binding;GO:0070006//metalloaminopeptidase activity	GO:0006508//proteolysis;GO:0043171//peptide catabolic process	--
FBgn0044812	948	2419	2936	20170	13724	15254	102.751	263.527	345.636	2001.9	1374.23	1685.02	237.305	1687.05	2.82969	2.28014e-11	4.53213e-10	TotC	Turandot C	-	-	-	-	GO:0005576//extracellular region;GO:0005615//extracellular space	-	GO:0002376//immune system process;GO:0006979//response to oxidative stress;GO:0009408//response to heat;GO:0009411//response to UV;GO:0009617//response to bacterium;GO:0034605//cellular response to heat;GO:0034644//cellular response to UV;GO:0045087//innate immune response	--
FBgn0263402	22	26	26	104	130	137	2.389	2.838	3.067	10.342	13.042	15.162	2.76467	12.8487	2.21644	2.33201e-11	4.62818e-10	CG43448	ACN97205.2 MIP09730p, partial [Drosophila melanogaster]	-	-	-	-	-	-	-	--
FBgn0263321	77	52	131	475	382	253	7.381	5.08	13.562	42.176	34.303	25.063	8.67433	33.8473	1.96422	2.36136e-11	4.6793e-10	CG43402	NP_001245838.1 uncharacterized protein Dmel_CG43402, isoform A [Drosophila melanogaster]	-	-	-	-	-	-	-	--
FBgn0010041	223	158	137	438	474	458	15.25	10.86	10.176	27.429	29.947	31.922	12.0953	29.766	1.29921	2.47289e-11	4.88545e-10	GstD5	Glutathione S transferase D5	Metabolism;Metabolism;Metabolism;Metabolism;Metabolism	Global and overview maps;Xenobiotics biodegradation and metabolism;Metabolism of other amino acids;Xenobiotics biodegradation and metabolism;Xenobiotics biodegradation and metabolism	ko01100//Metabolic pathways;ko00983//Drug metabolism - other enzymes;ko00480//Glutathione metabolism;ko00980//Metabolism of xenobiotics by cytochrome P450;ko00982//Drug metabolism - cytochrome P450	K00799;K00799;K00799;K00799;K00799	GO:0005737//cytoplasm	GO:0004364//glutathione transferase activity	GO:0006749//glutathione metabolic process;GO:0009636//response to toxic substance	--
FBgn0015589	392	362	300	896	866	650	2.668	2.476	2.218	5.584	5.445	4.508	2.454	5.179	1.07754	2.55792e-11	5.03818e-10	Apc	APC-like	Environmental Information Processing	Signal transduction	ko04310//Wnt signaling pathway	K02085	GO:0005737//cytoplasm;GO:0005829//cytosol;GO:0030424//axon;GO:0030877//beta-catenin destruction complex;GO:0045177//apical part of cell	GO:0005515//protein binding;GO:0008013//beta-catenin binding	GO:0001708//cell fate specification;GO:0007026//negative regulation of microtubule depolymerization;GO:0007367//segment polarity determination;GO:0007389//pattern specification process;GO:0007405//neuroblast proliferation;GO:0007420//brain development;GO:0007447//imaginal disc pattern formation;GO:0016055//Wnt signaling pathway;GO:0016477//cell migration;GO:0030178//negative regulation of Wnt sig…	--
FBgn0260991	6154	5307	4247	2079	2905	2589	142.826	123.544	107.207	44.067	62.022	61.288	124.526	55.7923	-1.1583	3.07947e-11	5.98408e-10	Incenp	Inner centromere protein	-	-	-	-	GO:0000775//chromosome, centromeric region;GO:0000776//kinetochore;GO:0005634//nucleus;GO:0005694//chromosome;GO:0005737//cytoplasm;GO:0032133//chromosome passenger complex;GO:0051233//spindle midzone;GO:1990023//mitotic spindle midzone;GO:1990385//meiotic spindle midzone	GO:0008017//microtubule binding;GO:0043539//protein serine/threonine kinase activator activity	GO:0000070//mitotic sister chromatid segregation;GO:0000281//mitotic cytokinesis;GO:0007056//spindle assembly involved in female meiosis;GO:0007065//male meiosis sister chromatid cohesion;GO:0008104//protein localization;GO:0008356//asymmetric cell division;GO:0010032//meiotic chromosome condensation;GO:0016572//histone phosphorylation;GO:0051257//meiotic spindle midzone assembly;GO:0051310//meta…	--
FBgn0013548	2989	2505	1938	850	1294	1096	64.72	54.517	45.578	16.854	25.885	24.186	54.9383	22.3083	-1.30023	3.08883e-11	5.99334e-10	l(2)dtl	lethal-(2)-denticleless	-	-	-	-	GO:0005634//nucleus;GO:0005737//cytoplasm	GO:0005515//protein binding	GO:0007049//cell cycle;GO:0016567//protein ubiquitination	--
FBgn0040373	662	656	733	269	368	302	22.177	22.012	26.686	8.246	11.371	10.272	23.625	9.963	-1.24566	3.37549e-11	6.52045e-10	CG3038	NP_569833.1 uncharacterized protein Dmel_CG3038, isoform A [Drosophila melanogaster]	-	-	-	-	GO:0000139//Golgi membrane;GO:0005794//Golgi apparatus;GO:0016020//membrane;GO:0016021//integral component of membrane	GO:0008375//acetylglucosaminyltransferase activity;GO:0008376//acetylgalactosaminyltransferase activity;GO:0016758//hexosyltransferase activity	GO:0006486//protein glycosylation	--
FBgn0033250	832	837	967	2623	2014	1474	12.827	12.937	16.064	36.872	28.685	22.984	13.9427	29.5137	1.08188	3.45236e-11	6.65908e-10	CG14762	NP_001246198.1 uncharacterized protein Dmel_CG14762, isoform B [Drosophila melanogaster]	-	-	-	-	-	GO:0005515//protein binding	-	--
FBgn0086690	105	144	187	508	500	336	0.784	1.161	1.509	3.954	4.306	3.291	1.15133	3.85033	1.74168	3.57726e-11	6.8898e-10	Plp	Pericentrin-like protein	-	-	-	-	GO:0005737//cytoplasm;GO:0005814//centriole;GO:0036064//ciliary basal body	GO:0060090//molecular adaptor activity	GO:0007020//microtubule nucleation;GO:0007098//centrosome cycle;GO:0007165//signal transduction;GO:0007605//sensory perception of sound;GO:0060285//cilium-dependent cell motility	--
FBgn0262838	53	24	25	194	148	164	7.807	3.553	4	26.167	20.14	24.619	5.12	23.642	2.20714	3.71072e-11	7.13629e-10	BomT1	Bomanin Tailed 1	-	-	-	-	-	-	-	--
FBgn0012042	349	342	171	743	820	878	25.378	25.026	13.493	49.502	55.111	65.054	21.299	56.5557	1.40889	3.86718e-11	7.42625e-10	AttA	Attacin-A	-	-	-	-	GO:0005576//extracellular region	-	GO:0042742//defense response to bacterium	--
FBgn0038000	30	31	21	178	127	110	1.19	1.236	0.905	6.466	4.655	4.448	1.11033	5.18967	2.22465	4.17795e-11	7.98772e-10	Rsbp15	Radial spoke binding protein 15	-	-	-	-	-	GO:0005515//protein binding	-	--
FBgn0036761	1430	1382	1208	681	785	676	45.409	44.392	41.358	19.332	22.719	21.648	43.7197	21.233	-1.04197	4.32978e-11	8.25379e-10	MED19	Mediator complex subunit 19	-	-	-	-	GO:0016592//mediator complex	GO:0003712//transcription coregulator activity;GO:0008134//transcription factor binding	GO:0006357//regulation of transcription by RNA polymerase II;GO:0045944//positive regulation of transcription by RNA polymerase II	--
FBgn0051272	1320	1071	768	2737	2380	2079	36.074	29.419	22.796	68.494	60.089	57.905	29.4297	62.1627	1.07878	4.60429e-11	8.76427e-10	CG31272	NP_650013.3 uncharacterized protein Dmel_CG31272 [Drosophila melanogaster]	-	-	-	-	GO:0016021//integral component of membrane	GO:0022857//transmembrane transporter activity	GO:0006629//lipid metabolic process;GO:0055085//transmembrane transport	--
FBgn0035033	958	813	686	321	410	376	24.812	21.164	19.298	7.613	9.81	9.925	21.758	9.116	-1.25507	4.6366e-11	8.81291e-10	CG3548	NP_611941.1 uncharacterized protein Dmel_CG3548 [Drosophila melanogaster]	-	-	-	-	-	GO:0003677//DNA binding	-	--
FBgn0020912	57	39	53	247	235	137	0.917	0.667	0.968	3.829	3.751	2.387	0.850667	3.32233	1.96553	4.9094e-11	9.27734e-10	Ptx1	Ptx1	-	-	-	-	GO:0005634//nucleus;GO:0005667//transcription regulator complex	GO:0000978//RNA polymerase II cis-regulatory region sequence-specific DNA binding;GO:0000981//DNA-binding transcription factor activity, RNA polymerase II-specific;GO:0003677//DNA binding;GO:0003700//DNA-binding transcription factor activity;GO:0043565//sequence-specific DNA binding	GO:0006355//regulation of transcription, DNA-templated;GO:0006357//regulation of transcription by RNA polymerase II;GO:0007275//multicellular organism development;GO:0009653//anatomical structure morphogenesis	Homeobox
FBgn0024980	156	182	207	456	417	417	7.546	8.638	10.354	20.724	18.857	20.495	8.846	20.0253	1.17873	5.04542e-11	9.52058e-10	Syx4	Syntaxin 4	-	-	-	-	GO:0005737//cytoplasm;GO:0005886//plasma membrane;GO:0012505//endomembrane system;GO:0016020//membrane;GO:0016021//integral component of membrane;GO:0031201//SNARE complex;GO:0045211//postsynaptic membrane;GO:0098793//presynapse	GO:0000149//SNARE binding;GO:0005484//SNAP receptor activity	GO:0006886//intracellular protein transport;GO:0006906//vesicle fusion;GO:0008582//regulation of synaptic assembly at neuromuscular junction;GO:0016081//synaptic vesicle docking;GO:0016192//vesicle-mediated transport;GO:0048278//vesicle docking;GO:0061025//membrane fusion;GO:0098917//retrograde trans-synaptic signaling	--
FBgn0263110	275	257	203	660	694	474	1.605	1.502	1.287	3.517	3.706	2.806	1.46467	3.343	1.19057	5.08372e-11	9.57898e-10	CG43367	NP_001189048.2 uncharacterized protein Dmel_CG43367, isoform C [Drosophila melanogaster]	-	-	-	-	GO:0005829//cytosol;GO:0016020//membrane	GO:0005515//protein binding;GO:0019901//protein kinase binding	GO:0008104//protein localization	--
FBgn0030122	2317	2049	1619	935	1071	1015	82.342	73.903	62.592	30.794	35.815	36.638	72.9457	34.4157	-1.08376	5.18215e-11	9.75037e-10	Aladin	Aladin	Genetic Information Processing	Translation	ko03013//Nucleocytoplasmic transport	K14320	GO:0000922//spindle pole;GO:0005643//nuclear pore;GO:0005737//cytoplasm;GO:0012505//endomembrane system;GO:0072686//mitotic spindle	GO:0005515//protein binding	GO:0001578//microtubule bundle formation;GO:0006913//nucleocytoplasmic transport;GO:0015031//protein transport;GO:0051028//mRNA transport;GO:0090307//mitotic spindle assembly;GO:1902365//positive regulation of protein localization to spindle pole body	--
FBgn0033845	1940	1723	1563	709	1012	859	36.381	32.225	31.857	12.022	17.539	16.407	33.4877	15.3227	-1.12796	6.20843e-11	1.1548e-09	mars	mars	-	-	-	-	GO:0000922//spindle pole;GO:0005634//nucleus;GO:0005654//nucleoplasm;GO:0005737//cytoplasm;GO:0005819//spindle;GO:0005876//spindle microtubule;GO:0005886//plasma membrane;GO:0072686//mitotic spindle	GO:0008017//microtubule binding;GO:0008157//protein phosphatase 1 binding	GO:0007051//spindle organization;GO:0007052//mitotic spindle organization;GO:0007059//chromosome segregation;GO:0007346//regulation of mitotic cell cycle;GO:0023052//signaling;GO:0051382//kinetochore assembly;GO:0051642//centrosome localization;GO:0051726//regulation of cell cycle	--
FBgn0038088	82	83	123	311	293	257	5.193	5.284	8.461	18.073	17.198	16.601	6.31267	17.2907	1.45367	6.23443e-11	1.15799e-09	CG10126	NP_788664.2 uncharacterized protein Dmel_CG10126, isoform B [Drosophila melanogaster]	-	-	-	-	-	GO:0005509//calcium ion binding	-	--
FBgn0022338	4807	4221	3893	1784	2376	2506	242.641	214.242	212.667	81.809	110.332	128.408	223.183	106.85	-1.06265	6.97194e-11	1.28764e-09	dnk	deoxyribonucleoside kinase	Metabolism;Metabolism;Metabolism	Global and overview maps;Nucleotide metabolism;Nucleotide metabolism	ko01100//Metabolic pathways;ko00230//Purine metabolism;ko00240//Pyrimidine metabolism	K05961;K05961;K05961	GO:0005737//cytoplasm;GO:0005739//mitochondrion	GO:0004797//thymidine kinase activity;GO:0005524//ATP binding;GO:0016301//kinase activity;GO:0019136//deoxynucleoside kinase activity	GO:0006139//nucleobase-containing compound metabolic process;GO:0006165//nucleoside diphosphate phosphorylation;GO:0006230//TMP biosynthetic process;GO:0016310//phosphorylation;GO:0046939//nucleotide phosphorylation;GO:0071897//DNA biosynthetic process	--
FBgn0015271	1663	1460	1336	652	823	814	56.628	49.969	49.412	20.33	25.89	28.249	52.003	24.823	-1.06692	7.73784e-11	1.42104e-09	Orc5	Origin recognition complex subunit 5	Cellular Processes	Cell growth and death	ko04110//Cell cycle	K02607	GO:0000808//origin recognition complex;GO:0005634//nucleus;GO:0005664//nuclear origin of replication recognition complex	GO:0003688//DNA replication origin binding;GO:0005524//ATP binding	GO:0006260//DNA replication;GO:0006261//DNA-dependent DNA replication;GO:0006270//DNA replication initiation;GO:0007052//mitotic spindle organization;GO:0007076//mitotic chromosome condensation	--
FBgn0031879	144	180	140	376	360	392	0.709	0.889	0.743	1.687	1.648	1.972	0.780333	1.769	1.18077	8.16118e-11	1.49039e-09	uif	uninflatable	-	-	-	-	GO:0016021//integral component of membrane;GO:0016324//apical plasma membrane;GO:0031901//early endosome membrane	GO:0005112//Notch binding;GO:0005509//calcium ion binding;GO:0005515//protein binding;GO:0008236//serine-type peptidase activity	GO:0007219//Notch signaling pathway;GO:0016360//sensory organ precursor cell fate determination;GO:0035152//regulation of tube architecture, open tracheal system;GO:0045167//asymmetric protein localization involved in cell fate determination;GO:0045746//negative regulation of Notch signaling pathway;GO:0046716//muscle cell cellular homeostasis	--
FBgn0036689	1180	1118	1082	421	643	540	31.929	30.406	31.799	10.431	16.074	14.892	31.378	13.799	-1.18519	8.70443e-11	1.58737e-09	CG7730	NP_788521.2 uncharacterized protein Dmel_CG7730 [Drosophila melanogaster]	-	-	-	-	-	-	-	--
FBgn0032253	449	510	666	1460	1234	1004	8.225	9.39	13.251	24.413	20.883	18.744	10.2887	21.3467	1.05295	9.71344e-11	1.76644e-09	LManI	Lysosomal alpha-mannosidase I	Cellular Processes;Metabolism	Transport and catabolism;Glycan biosynthesis and metabolism	ko04142//Lysosome;ko00511//Other glycan degradation	K12311;K12311	GO:0005774//vacuolar membrane	GO:0003824//catalytic activity;GO:0004559//alpha-mannosidase activity;GO:0004571//mannosyl-oligosaccharide 1,2-alpha-mannosidase activity;GO:0030246//carbohydrate binding;GO:0046872//metal ion binding	GO:0005975//carbohydrate metabolic process;GO:0006013//mannose metabolic process	--
FBgn0031693	209	275	444	1060	892	729	7.206	9.537	16.628	33.469	28.409	25.628	11.1237	29.1687	1.39079	9.78973e-11	1.77783e-09	Cyp4ac1	Cyp4ac1	-	-	-	-	GO:0005789//endoplasmic reticulum membrane	GO:0004497//monooxygenase activity;GO:0005506//iron ion binding;GO:0016705//oxidoreductase activity, acting on paired donors, with incorporation or reduction of molecular oxygen;GO:0020037//heme binding	-	--
FBgn0036641	1951	1856	1610	738	984	1015	127.016	121.152	113.721	43.996	59.193	67.418	120.63	56.869	-1.08487	1.01283e-10	1.83676e-09	Smn	survival motor neuron	-	-	-	-	GO:0005634//nucleus;GO:0005681//spliceosomal complex;GO:0005737//cytoplasm;GO:0005886//plasma membrane;GO:0015030//Cajal body;GO:0030018//Z disc;GO:0031594//neuromuscular junction;GO:0031674//I band;GO:0032797//SMN complex;GO:0034718//SMN-Gemin2 complex;GO:0034730//SmD-containing SMN-Sm protein complex;GO:0071254//cytoplasmic U snRNP body;GO:0097504//Gemini of coiled bodies;GO:0098794//postsynapse	GO:0003723//RNA binding;GO:0042802//identical protein binding;GO:0051393//alpha-actinin binding	GO:0000387//spliceosomal snRNP assembly;GO:0000398//mRNA splicing, via spliceosome;GO:0002164//larval development;GO:0006397//mRNA processing;GO:0007274//neuromuscular synaptic transmission;GO:0007417//central nervous system development;GO:0007528//neuromuscular junction development;GO:0008345//larval locomotory behavior;GO:0009792//embryo development ending in birth or egg hatching;GO:0017145//s…	--
FBgn0010424	65	73	53	276	199	184	3.796	4.381	3.437	14.679	10.605	10.97	3.87133	12.0847	1.64228	1.03566e-10	1.87295e-09	TpnC73F	Troponin C at 73F	Human Diseases;Environmental Information Processing;Human Diseases;Human Diseases;Environmental Information Processing;Organismal Systems;Environmental Information Processing;Organismal Systems;Human Diseases;Environmental Information Processing;Human Diseases;Cellular Processes;Organismal Systems;Organismal Systems;Cellular Processes;Organismal Systems;Organismal Systems;Organismal Systems;Human…	Neurodegenerative disease;Signal transduction;Neurodegenerative disease;Neurodegenerative disease;Signal transduction;Sensory system;Signal transduction;Circulatory system;Cancer: overview;Signal transduction;Substance dependence;Cell growth and death;Endocrine system;Endocrine system;Cell growth and death;Circulatory system;Digestive system;Environmental adaptation;Infectious disease: viral;Nerv…	ko05022//Pathways of neurodegeneration - multiple diseases;ko04070//Phosphatidylinositol signaling system;ko05012//Parkinson disease;ko05010//Alzheimer disease;ko04024//cAMP signaling pathway;ko04745//Phototransduction - fly;ko04022//cGMP-PKG signaling pathway;ko04261//Adrenergic signaling in cardiomyocytes;ko05200//Pathways in cancer;ko04020//Calcium signaling pathway;ko05034//Alcoholism;ko04218…	K02183;K02183;K02183;K02183;K02183;K02183;K02183;K02183;K02183;K02183;K02183;K02183;K02183;K02183;K02183;K02183;K02183;K02183;K02183;K02183;K02183;K02183;K02183;K02183;K02183;K02183;K02183;K02183;K02183;K02183;K02183;K02183;K02183;K02183;K02183;K02183;K02183;K02183;K02183;K02183;K02183;K02183;K02183;K02183	-	GO:0005509//calcium ion binding;GO:0030234//enzyme regulator activity	GO:0000226//microtubule cytoskeleton organization;GO:0019722//calcium-mediated signaling	--
FBgn0010398	615	523	562	273	269	280	22.055	18.945	21.844	9.038	8.786	10.193	20.948	9.339	-1.16547	1.08338e-10	1.95383e-09	Lrr47	Leucine-rich repeat 47	-	-	-	-	GO:0005576//extracellular region;GO:0005634//nucleus;GO:0005737//cytoplasm;GO:0019898//extrinsic component of membrane	GO:0005515//protein binding	GO:0007265//Ras protein signal transduction	--
FBgn0261260	256	157	185	656	564	423	0.902	0.557	0.704	2.092	1.831	1.534	0.721	1.819	1.33507	1.18458e-10	2.12167e-09	mgl	Megalin	Organismal Systems;Organismal Systems;Environmental Information Processing	Digestive system;Endocrine system;Signal transduction	ko04979//Cholesterol metabolism;ko04918//Thyroid hormone synthesis;ko04340//Hedgehog signaling pathway	K06233;K06233;K06233	GO:0005829//cytosol;GO:0005886//plasma membrane;GO:0016021//integral component of membrane;GO:0016324//apical plasma membrane	GO:0005509//calcium ion binding;GO:0005515//protein binding	GO:0006897//endocytosis;GO:0030100//regulation of endocytosis;GO:0040003//chitin-based cuticle development;GO:0048082//regulation of adult chitin-containing cuticle pigmentation	--
FBgn0013772	254	263	466	1018	872	758	8.193	8.526	16.325	30.067	25.984	24.917	11.0147	26.9893	1.29296	1.19493e-10	2.13726e-09	Cyp6a8	Cytochrome P450-6a8	-	-	-	-	GO:0005789//endoplasmic reticulum membrane;GO:0012505//endomembrane system	GO:0004497//monooxygenase activity;GO:0005506//iron ion binding;GO:0009055//electron transfer activity;GO:0016705//oxidoreductase activity, acting on paired donors, with incorporation or reduction of molecular oxygen;GO:0018685//alkane 1-monooxygenase activity;GO:0020037//heme binding	GO:0017143//insecticide metabolic process;GO:0031000//response to caffeine;GO:0048252//lauric acid metabolic process	--
FBgn0042129	138	148	155	432	449	294	10.06	10.844	12.273	28.838	30.239	21.843	11.059	26.9733	1.28631	1.21625e-10	2.17242e-09	OS9	Olfactory-specific 9	-	-	-	-	GO:0005634//nucleus	-	GO:0007608//sensory perception of smell	--
FBgn0002733	204	188	190	442	434	405	11.982	11.099	12.121	23.774	23.551	24.245	11.734	23.8567	1.0237	1.22787e-10	2.1874e-09	E(spl)mbeta-HLH	Enhancer of split mbeta, helix-loop-helix	-	-	-	-	GO:0005634//nucleus	GO:0000977//RNA polymerase II transcription regulatory region sequence-specific DNA binding;GO:0001227//DNA-binding transcription repressor activity, RNA polymerase II-specific;GO:0003677//DNA binding;GO:0003700//DNA-binding transcription factor activity;GO:0043565//sequence-specific DNA binding;GO:0046983//protein dimerization activity;GO:1990837//sequence-specific double-stranded DNA binding	GO:0000122//negative regulation of transcription by RNA polymerase II;GO:0002052//positive regulation of neuroblast proliferation;GO:0006355//regulation of transcription, DNA-templated;GO:0007219//Notch signaling pathway;GO:0009952//anterior/posterior pattern specification;GO:0030154//cell differentiation;GO:0050767//regulation of neurogenesis;GO:1902692//regulation of neuroblast proliferation	bHLH
FBgn0040588	109	96	99	277	313	241	11.248	9.199	11.308	26.071	29.522	24.059	10.585	26.5507	1.32673	1.22799e-10	2.1874e-09	CG13841	NP_001303483.1 uncharacterized protein Dmel_CG13841, isoform B [Drosophila melanogaster]	-	-	-	-	-	-	-	--
FBgn0030157	617	693	984	2396	1848	1413	48.222	54.439	83.531	171.479	133.435	112.552	62.064	139.155	1.16487	1.25904e-10	2.23965e-09	CG1468	NP_572585.3 uncharacterized protein Dmel_CG1468 [Drosophila melanogaster]	-	-	-	-	-	-	-	--
FBgn0004428	251	338	248	106	98	73	24.86	33.648	26.679	9.614	8.967	7.369	28.3957	8.65	-1.7149	1.34155e-10	2.37992e-09	LysE	Lysozyme E	-	-	-	-	GO:0005615//extracellular space	GO:0003796//lysozyme activity	GO:0008152//metabolic process;GO:0019835//cytolysis;GO:0045824//negative regulation of innate immune response;GO:0050829//defense response to Gram-negative bacterium	--
FBgn0040250	59	67	98	289	215	236	1.951	2.227	3.52	8.752	6.569	7.954	2.566	7.75833	1.59623	1.37535e-10	2.43657e-09	Ugt304A1	UDP-glycosyltransferase family 304 member A1	Metabolism;Metabolism;Metabolism;Metabolism;Metabolism;Metabolism;Metabolism;Metabolism	Global and overview maps;Xenobiotics biodegradation and metabolism;Xenobiotics biodegradation and metabolism;Xenobiotics biodegradation and metabolism;Carbohydrate metabolism;Metabolism of cofactors and vitamins;Metabolism of cofactors and vitamins;Carbohydrate metabolism	ko01100//Metabolic pathways;ko00983//Drug metabolism - other enzymes;ko00980//Metabolism of xenobiotics by cytochrome P450;ko00982//Drug metabolism - cytochrome P450;ko00040//Pentose and glucuronate interconversions;ko00860//Porphyrin metabolism;ko00830//Retinol metabolism;ko00053//Ascorbate and aldarate metabolism	K00699;K00699;K00699;K00699;K00699;K00699;K00699;K00699	GO:0016021//integral component of membrane;GO:0043231//intracellular membrane-bounded organelle	GO:0008194//UDP-glycosyltransferase activity;GO:0015020//glucuronosyltransferase activity	-	--
FBgn0005626	19	20	16	132	128	73	0.357	0.397	0.301	2.223	2.174	1.368	0.351667	1.92167	2.45008	1.40591e-10	2.48733e-09	ple	pale	Metabolism;Metabolism;Metabolism	Global and overview maps;Metabolism of cofactors and vitamins;Amino acid metabolism	ko01100//Metabolic pathways;ko00790//Folate biosynthesis;ko00350//Tyrosine metabolism	K00501;K00501;K00501	GO:0005737//cytoplasm;GO:0030424//axon;GO:0043204//perikaryon;GO:0048471//perinuclear region of cytoplasm	GO:0004497//monooxygenase activity;GO:0004511//tyrosine 3-monooxygenase activity;GO:0005506//iron ion binding;GO:0016714//oxidoreductase activity, acting on paired donors, with incorporation or reduction of molecular oxygen, reduced pteridine as one donor, and incorporation of one atom of oxygen	GO:0006584//catecholamine metabolic process;GO:0006585//dopamine biosynthetic process from tyrosine;GO:0007619//courtship behavior;GO:0008049//male courtship behavior;GO:0008344//adult locomotory behavior;GO:0009072//aromatic amino acid family metabolic process;GO:0009611//response to wounding;GO:0035220//wing disc development;GO:0040040//thermosensory behavior;GO:0042136//neurotransmitter biosyn…	--
FBgn0031571	79	76	67	309	262	176	0.448	0.433	0.413	1.605	1.376	1.018	0.431333	1.333	1.6278	1.41307e-10	2.49662e-09	bark	bark beetle	-	-	-	-	GO:0005886//plasma membrane;GO:0005912//adherens junction;GO:0005918//septate junction;GO:0005923//bicellular tight junction;GO:0016020//membrane;GO:0016021//integral component of membrane;GO:0061689//tricellular tight junction	GO:0005044//scavenger receptor activity;GO:0030246//carbohydrate binding	GO:0034976//response to endoplasmic reticulum stress;GO:0035002//liquid clearance, open tracheal system;GO:0035159//regulation of tube length, open tracheal system;GO:0045217//cell-cell junction maintenance;GO:1904274//tricellular tight junction assembly	--
FBgn0036815	2573	2398	2006	1006	1357	1242	130.733	122.536	110.746	46.813	63.616	64.307	121.338	58.2453	-1.05882	1.59496e-10	2.79902e-09	HipHop	HP1-HOAP-interacting protein	-	-	-	-	GO:0000781//chromosome, telomeric region	-	GO:0031848//protection from non-homologous end joining at telomere;GO:0034080//CENP-A containing nucleosome assembly	--
FBgn0019928	113	160	165	32	41	23	7.737	11.011	12.27	2.006	2.593	1.605	10.3393	2.068	-2.32184	1.64818e-10	2.88465e-09	Ser8	Ser8	Environmental Information Processing;Organismal Systems;Organismal Systems;Human Diseases	Signaling molecules and interaction;Digestive system;Digestive system;Infectious disease: viral	ko04080//Neuroactive ligand-receptor interaction;ko04974//Protein digestion and absorption;ko04972//Pancreatic secretion;ko05164//Influenza A	K01312;K01312;K01312;K01312	-	GO:0004252//serine-type endopeptidase activity;GO:0008236//serine-type peptidase activity	GO:0006508//proteolysis	--
FBgn0033787	5819	4077	2957	10724	9258	9320	314.151	221.302	173.04	529.762	461.549	511.866	236.164	501.059	1.08519	1.69781e-10	2.96355e-09	CG13321	NP_001286367.1 uncharacterized protein Dmel_CG13321, isoform B [Drosophila melanogaster]	-	-	-	-	-	-	-	--
FBgn0030507	875	737	767	288	438	348	41.502	35.161	39.544	12.462	19.227	16.814	38.7357	16.1677	-1.26055	1.70815e-10	2.97761e-09	CG11164	NP_001285220.1 uncharacterized protein Dmel_CG11164, isoform B [Drosophila melanogaster]	Genetic Information Processing	Replication and repair	ko03030//DNA replication	K10744	GO:0005634//nucleus;GO:0005654//nucleoplasm;GO:0032299//ribonuclease H2 complex	GO:0004523//RNA-DNA hybrid ribonuclease activity	GO:0006401//RNA catabolic process;GO:0009259//ribonucleotide metabolic process	--
FBgn0003159	193	153	172	602	499	335	2.546	2.062	2.444	7.327	6.033	4.492	2.35067	5.95067	1.33998	1.74611e-10	3.03972e-09	CG2841	NP_001284821.1 uncharacterized protein Dmel_CG2841, isoform F [Drosophila melanogaster]	-	-	-	-	-	-	-	--
FBgn0030589	77	105	69	252	297	223	2.175	2.981	2.117	6.517	7.749	6.419	2.42433	6.895	1.50796	1.78706e-10	3.10687e-09	CG9519	NP_572978.1 uncharacterized protein Dmel_CG9519 [Drosophila melanogaster]	-	-	-	-	-	GO:0016491//oxidoreductase activity;GO:0016614//oxidoreductase activity, acting on CH-OH group of donors;GO:0050660//flavin adenine dinucleotide binding	GO:0045455//ecdysteroid metabolic process	--
MSTRG.8817	395	384	669	1709	1236	998	19.444	18.999	35.768	77.034	56.208	50.068	24.737	61.1033	1.30458	1.90093e-10	3.30043e-09	--	omega-ORF; evidence of in vivo translation but product apparently does not survive for any time; no product detected in vivo [Drosophila melanogaster]	-	-	-	-	-	-	-	--
FBgn0023515	3135	2800	2390	1336	1686	1422	52.363	47.083	43.327	20.414	26.002	24.238	47.591	23.5513	-1.01488	1.93964e-10	3.36315e-09	CG14814	NP_569947.2 uncharacterized protein Dmel_CG14814, isoform B [Drosophila melanogaster]	-	-	-	-	GO:0005634//nucleus	-	-	--
FBgn0036660	1479	1323	1050	376	658	569	37.698	33.787	28.885	8.819	15.68	14.959	33.4567	13.1527	-1.34694	1.96481e-10	3.4003e-09	CG13025	NP_001261971.1 uncharacterized protein Dmel_CG13025, isoform B [Drosophila melanogaster]	-	-	-	-	GO:0005634//nucleus	GO:0004842//ubiquitin-protein transferase activity;GO:0005515//protein binding;GO:0008270//zinc ion binding;GO:0061630//ubiquitin protein ligase activity	GO:0016567//protein ubiquitination;GO:0036297//interstrand cross-link repair	--
FBgn0010342	1479	1356	1436	647	847	795	46.836	43.161	49.392	18.762	24.78	25.658	46.463	23.0667	-1.01027	1.96627e-10	3.4003e-09	Map60	Microtubule-associated protein 60	-	-	-	-	GO:0005634//nucleus;GO:0005813//centrosome	-	-	--
FBgn0085436	220	176	244	972	708	388	1.408	1.053	1.691	5.426	3.979	2.356	1.384	3.92033	1.50213	2.16539e-10	3.72979e-09	Not1	Not1	Genetic Information Processing	Folding, sorting and degradation	ko03018//RNA degradation	K12604	GO:0000932//P-body;GO:0005634//nucleus;GO:0005737//cytoplasm;GO:0030014//CCR4-NOT complex;GO:0030015//CCR4-NOT core complex	GO:0004535//poly(A)-specific ribonuclease activity;GO:0060090//molecular adaptor activity	GO:0000288//nuclear-transcribed mRNA catabolic process, deadenylation-dependent decay;GO:0000289//nuclear-transcribed mRNA poly(A) tail shortening;GO:0006402//mRNA catabolic process;GO:0017148//negative regulation of translation;GO:0030707//ovarian follicle cell development	--
FBgn0035360	2806	2486	1465	5177	5091	4925	97.277	86.599	55.253	163.992	163.256	174.164	79.7097	167.137	1.06821	2.29773e-10	3.95252e-09	CG1246	NP_001189036.1 uncharacterized protein Dmel_CG1246, isoform C [Drosophila melanogaster]	-	-	-	-	GO:0016021//integral component of membrane	-	-	--
FBgn0034471	325	240	269	568	747	579	35.103	26.063	31.558	56.18	74.544	63.732	30.908	64.8187	1.06843	2.37676e-10	4.08308e-09	Obp56e	Odorant-binding protein 56e	-	-	-	-	GO:0005576//extracellular region;GO:0005615//extracellular space	GO:0005549//odorant binding	GO:0007606//sensory perception of chemical stimulus;GO:0007608//sensory perception of smell;GO:0032504//multicellular organism reproduction	--
FBgn0050026	183	206	329	920	707	502	12.804	14.487	25.003	58.946	45.702	35.798	17.4313	46.8153	1.4253	2.66238e-10	4.53788e-09	CG30026	NP_725049.3 uncharacterized protein Dmel_CG30026 [Drosophila melanogaster]	-	-	-	-	-	-	-	--
FBgn0034612	99	91	66	245	248	247	1.29	1.182	0.935	2.909	2.976	3.264	1.13567	3.04967	1.42511	2.80688e-10	4.7531e-09	CG10505	NP_611571.2 uncharacterized protein Dmel_CG10505 [Drosophila melanogaster]	Environmental Information Processing;Environmental Information Processing;Organismal Systems;Human Diseases	Membrane transport;Signal transduction;Digestive system;Drug resistance: antineoplastic	ko02010//ABC transporters;ko04024//cAMP signaling pathway;ko04976//Bile secretion;ko01523//Antifolate resistance	K05673;K05673;K05673;K05673	GO:0016020//membrane;GO:0016021//integral component of membrane	GO:0005524//ATP binding;GO:0016887//ATP hydrolysis activity;GO:0042626//ATPase-coupled transmembrane transporter activity;GO:0140359//ABC-type transporter activity	GO:0010043//response to zinc ion;GO:0046688//response to copper ion;GO:0055085//transmembrane transport	--
FBgn0033983	190	212	138	498	452	395	4.641	5.21	3.589	10.934	10.075	9.752	4.48	10.2537	1.19457	2.97871e-10	5.0245e-09	ADPS	Alkyldihydroxyacetonephosphate synthase	Metabolism;Cellular Processes;Metabolism	Global and overview maps;Transport and catabolism;Lipid metabolism	ko01100//Metabolic pathways;ko04146//Peroxisome;ko00565//Ether lipid metabolism	K00803;K00803;K00803	GO:0005777//peroxisome	GO:0003824//catalytic activity;GO:0008609//alkylglycerone-phosphate synthase activity;GO:0016491//oxidoreductase activity;GO:0050660//flavin adenine dinucleotide binding;GO:0071949//FAD binding	GO:0008610//lipid biosynthetic process;GO:0008611//ether lipid biosynthetic process	--
FBgn0013276	1784	1599	1167	17472	9655	6399	43.142	38.877	30.662	386.982	215.752	157.745	37.5603	253.493	2.75466	3.19135e-10	5.37623e-09	Hsp70Ab	Heat-shock-protein-70Ab	Genetic Information Processing;Cellular Processes;Genetic Information Processing;Organismal Systems	Folding, sorting and degradation;Transport and catabolism;Transcription;Aging	ko04141//Protein processing in endoplasmic reticulum;ko04144//Endocytosis;ko03040//Spliceosome;ko04213//Longevity regulating pathway - multiple species	K03283;K03283;K03283;K03283	GO:0005634//nucleus;GO:0005737//cytoplasm;GO:0005829//cytosol;GO:0005886//plasma membrane	GO:0005524//ATP binding;GO:0016887//ATP hydrolysis activity;GO:0031072//heat shock protein binding;GO:0044183//protein folding chaperone;GO:0051082//unfolded protein binding;GO:0051787//misfolded protein binding;GO:0140662//ATP-dependent protein folding chaperone	GO:0001666//response to hypoxia;GO:0006986//response to unfolded protein;GO:0009408//response to heat;GO:0016192//vesicle-mediated transport;GO:0034620//cellular response to unfolded protein;GO:0035080//heat shock-mediated polytene chromosome puffing;GO:0042026//protein refolding;GO:0051085//chaperone cofactor-dependent protein refolding	--
FBgn0030803	571	543	565	262	305	238	19.348	18.549	21.048	8.16	9.607	8.25	19.6483	8.67233	-1.17991	3.39718e-10	5.70823e-09	CG4880	NP_573177.1 uncharacterized protein Dmel_CG4880, isoform A [Drosophila melanogaster]	-	-	-	-	GO:0005635//nuclear envelope;GO:0005783//endoplasmic reticulum;GO:0016021//integral component of membrane	GO:0005524//ATP binding;GO:0016887//ATP hydrolysis activity	GO:0071218//cellular response to misfolded protein	--
FBgn0051664	203	220	361	880	713	561	5.869	6.382	11.382	23.363	19.16	16.544	7.87767	19.689	1.32155	3.43195e-10	5.75923e-09	CG31664	NP_001356905.1 uncharacterized protein Dmel_CG31664, isoform E [Drosophila melanogaster]	-	-	-	-	-	-	-	--
FBgn0259734	1778	1517	1357	785	900	813	24.794	21.213	21.04	10.411	11.43	11.425	22.349	11.0887	-1.01112	3.44568e-10	5.77484e-09	Nost	Nostrin	-	-	-	-	GO:0005768//endosome	GO:0005515//protein binding;GO:0005543//phospholipid binding;GO:0008289//lipid binding	GO:0007009//plasma membrane organization;GO:0030708//germarium-derived female germ-line cyst encapsulation;GO:0035317//imaginal disc-derived wing hair organization;GO:0097320//plasma membrane tubulation;GO:1903391//regulation of adherens junction organization	--
FBgn0029932	578	1119	870	2304	2181	1689	14.55	27.622	23.322	51.392	46.812	41.25	21.8313	46.4847	1.09035	3.47661e-10	5.81174e-09	CG4607	NP_572380.1 uncharacterized protein Dmel_CG4607, isoform A [Drosophila melanogaster]	-	-	-	-	GO:0016020//membrane;GO:0016021//integral component of membrane	GO:0022857//transmembrane transporter activity;GO:0051119//sugar transmembrane transporter activity	GO:0008643//carbohydrate transport;GO:0055085//transmembrane transport	--
FBgn0038484	1061	801	566	2132	1930	1613	56.174	42.625	32.548	103.364	94.402	87.037	43.7823	94.9343	1.11658	3.56418e-10	5.95049e-09	CG5246	NP_650603.1 uncharacterized protein Dmel_CG5246 [Drosophila melanogaster]	-	-	-	-	-	GO:0004252//serine-type endopeptidase activity	GO:0006508//proteolysis	--
FBgn0263083	74	65	103	258	262	216	17.566	15.508	26.556	56.081	57.457	52.256	19.8767	55.2647	1.47528	3.74305e-10	6.2252e-09	CG43351	AEM92663.1 MIP31865p1, partial [Drosophila melanogaster]	-	-	-	-	-	-	-	--
FBgn0038476	964	829	1023	524	489	475	24.819	21.454	28.607	12.353	11.631	12.463	24.96	12.149	-1.03878	3.78488e-10	6.28675e-09	kuk	kugelkern	-	-	-	-	GO:0005637//nuclear inner membrane	-	GO:0006997//nucleus organization;GO:0007349//cellularization;GO:0007569//cell aging;GO:0008344//adult locomotory behavior;GO:0016331//morphogenesis of embryonic epithelium	--
FBgn0050502	494	344	318	829	816	885	20.297	14.208	14.174	31.155	30.937	37.042	16.2263	33.0447	1.02608	4.52105e-10	7.47148e-09	fa2h	fatty acid 2-hydroylase	-	-	-	-	GO:0005783//endoplasmic reticulum;GO:0005789//endoplasmic reticulum membrane;GO:0016021//integral component of membrane	GO:0005506//iron ion binding;GO:0016491//oxidoreductase activity;GO:0020037//heme binding;GO:0080132//fatty acid alpha-hydroxylase activity	GO:0006629//lipid metabolic process;GO:0006631//fatty acid metabolic process;GO:0006633//fatty acid biosynthetic process;GO:0008610//lipid biosynthetic process	--
FBgn0027903	1760	1562	1207	607	785	792	72.893	65.023	54.296	23.021	30.036	33.431	64.0707	28.8293	-1.15213	4.69692e-10	7.74183e-09	Pol31	Pol31 polymerase delta subunit	Genetic Information Processing;Genetic Information Processing;Genetic Information Processing;Genetic Information Processing;Genetic Information Processing	Replication and repair;Replication and repair;Replication and repair;Replication and repair;Replication and repair	ko03420//Nucleotide excision repair;ko03030//DNA replication;ko03440//Homologous recombination;ko03430//Mismatch repair;ko03410//Base excision repair	K02328;K02328;K02328;K02328;K02328	GO:0005634//nucleus;GO:0005654//nucleoplasm;GO:0016035//zeta DNA polymerase complex;GO:0042575//DNA polymerase complex;GO:0043625//delta DNA polymerase complex	GO:0003677//DNA binding	GO:0006260//DNA replication;GO:0006271//DNA strand elongation involved in DNA replication;GO:1990506//mitotic DNA-dependent DNA replication	--
FBgn0036354	1090	1017	730	412	485	431	38.188	35.783	27.809	13.207	15.685	15.377	33.9267	14.7563	-1.20109	4.82414e-10	7.92217e-09	Poc1	Proteome of centrioles 1	-	-	-	-	-	GO:0005515//protein binding	GO:0007098//centrosome cycle	--
FBgn0040653	1034	622	1543	9004	7408	4792	141.877	85.87	230.153	1132.7	940.476	670.73	152.633	914.636	2.58313	4.89334e-10	8.02569e-09	IM4	Immune induced molecule 4	Organismal Systems	Immune system	ko04624//Toll and Imd signaling pathway	K20702	GO:0005576//extracellular region;GO:0005615//extracellular space	-	GO:0000902//cell morphogenesis;GO:0006952//defense response;GO:0006959//humoral immune response;GO:0009617//response to bacterium;GO:0045087//innate immune response	--
FBgn0086695	1742	1537	1134	527	742	731	51.93	46.053	36.69	14.386	20.435	22.209	44.891	19.01	-1.23967	5.05888e-10	8.26902e-09	hd	humpty dumpty	-	-	-	-	GO:0005634//nucleus	-	GO:0007275//multicellular organism development;GO:0007307//eggshell chorion gene amplification;GO:0033260//nuclear DNA replication;GO:0051301//cell division	--
FBgn0284442	6929	6006	4399	2297	3238	2829	144.898	126.239	99.916	43.986	62.556	60.294	123.684	55.612	-1.15319	5.06073e-10	8.26902e-09	Mcm3	Minichromosome maintenance 3	Genetic Information Processing	Replication and repair	ko03030//DNA replication	K02541	GO:0005634//nucleus;GO:0042555//MCM complex;GO:0071162//CMG complex	GO:0003677//DNA binding;GO:0003678//DNA helicase activity;GO:0003688//DNA replication origin binding;GO:0003697//single-stranded DNA binding;GO:0005524//ATP binding	GO:0000727//double-strand break repair via break-induced replication;GO:0006260//DNA replication;GO:0006267//pre-replicative complex assembly involved in nuclear cell cycle DNA replication;GO:0006270//DNA replication initiation;GO:0006271//DNA strand elongation involved in DNA replication;GO:0007405//neuroblast proliferation;GO:0016319//mushroom body development;GO:0032508//DNA duplex unwinding;G…	--
FBgn0025697	295	307	488	861	921	774	7.359	7.628	13.051	19.652	21.097	19.656	9.346	20.135	1.10728	5.11248e-10	8.34312e-09	santa-maria	scavenger receptor acting in neural tissue and majority of rhodopsin is absent	-	-	-	-	GO:0005886//plasma membrane;GO:0016020//membrane;GO:0016021//integral component of membrane	-	GO:0007602//phototransduction;GO:0016063//rhodopsin biosynthetic process;GO:0016116//carotenoid metabolic process;GO:0043052//thermotaxis	--
FBgn0031695	77	78	149	370	349	273	2.754	2.804	5.789	12.119	11.533	9.952	3.78233	11.2013	1.56632	5.19307e-10	8.45295e-09	Cyp4ac3	Cyp4ac3	-	-	-	-	GO:0005789//endoplasmic reticulum membrane	GO:0004497//monooxygenase activity;GO:0005506//iron ion binding;GO:0016705//oxidoreductase activity, acting on paired donors, with incorporation or reduction of molecular oxygen;GO:0020037//heme binding	-	--
FBgn0040775	96	58	61	191	307	240	19.766	12.003	13.642	36.012	58.397	50.362	15.137	48.257	1.67266	5.45489e-10	8.85757e-09	CG12158	-	-	-	-	-	-	-	-	--
FBgn0000996	3259	2751	2362	1372	1666	1463	67.452	57.003	52.796	25.99	31.743	30.681	59.0837	29.4713	-1.00345	5.78662e-10	9.36125e-09	dup	double parked	-	-	-	-	GO:0005634//nucleus;GO:0005657//replication fork;GO:0005737//cytoplasm	GO:0003677//DNA binding;GO:0070182//DNA polymerase binding	GO:0000076//DNA replication checkpoint signaling;GO:0000278//mitotic cell cycle;GO:0006260//DNA replication;GO:0007304//chorion-containing eggshell formation;GO:0007307//eggshell chorion gene amplification;GO:0021782//glial cell development;GO:0030174//regulation of DNA-dependent DNA replication initiation;GO:0042023//DNA endoreduplication;GO:0042065//glial cell growth;GO:0071163//DNA replication…	--
FBgn0000588	812	771	631	319	396	363	27.374	26.125	23.105	9.848	12.333	12.472	25.5347	11.551	-1.14444	5.80243e-10	9.37068e-09	esc	extra sexcombs	-	-	-	-	GO:0005634//nucleus;GO:0005700//polytene chromosome;GO:0035097//histone methyltransferase complex;GO:0035098//ESC/E(Z) complex	GO:0005515//protein binding;GO:0008047//enzyme activator activity;GO:0042802//identical protein binding	GO:0000122//negative regulation of transcription by RNA polymerase II;GO:0007275//multicellular organism development;GO:0016458//gene silencing;GO:0016571//histone methylation;GO:0031062//positive regulation of histone methylation;GO:0048096//chromatin-mediated maintenance of transcription;GO:0051567//histone H3-K9 methylation;GO:0070734//histone H3-K27 methylation	--
FBgn0030985	238	262	326	646	637	524	18.627	20.61	27.712	46.297	46.057	41.796	22.3163	44.7167	1.00271	6.1818e-10	9.92666e-09	Obp18a	Odorant-binding protein 18a	-	-	-	-	GO:0005576//extracellular region	GO:0005549//odorant binding	GO:0007606//sensory perception of chemical stimulus	--
FBgn0036688	964	757	589	256	331	369	19.848	15.666	13.172	4.827	6.296	7.743	16.2287	6.28867	-1.36772	6.52087e-10	1.04454e-08	Fit2	Fermitin 2	-	-	-	-	GO:0030055//cell-substrate junction	GO:0005178//integrin binding	GO:0007160//cell-matrix adhesion;GO:0007229//integrin-mediated signaling pathway;GO:0048738//cardiac muscle tissue development	--
FBgn0036321	625	1104	1106	2347	2231	1874	8.536	15.155	16.407	29.353	28.15	26.085	13.366	27.8627	1.05977	6.59378e-10	1.05492e-08	CG14120	NP_648610.1 uncharacterized protein Dmel_CG14120 [Drosophila melanogaster]	-	-	-	-	GO:0005634//nucleus;GO:0005739//mitochondrion;GO:0005743//mitochondrial inner membrane	GO:0000014//single-stranded DNA endodeoxyribonuclease activity;GO:0003676//nucleic acid binding;GO:0004518//nuclease activity;GO:0004519//endonuclease activity;GO:0004521//endoribonuclease activity;GO:0016787//hydrolase activity;GO:0046872//metal ion binding	GO:0000737//DNA catabolic process, endonucleolytic;GO:0006309//apoptotic DNA fragmentation	--
FBgn0000114	2828	2021	2349	1335	1341	1068	67.158	47.843	60.036	27.748	29.024	25.644	58.3457	27.472	-1.08666	7.0442e-10	1.1256e-08	bru1	bruno 1	Organismal Systems	Development and regeneration	ko04320//Dorso-ventral axis formation	K02177	GO:0005634//nucleus;GO:0005737//cytoplasm;GO:0016604//nuclear body;GO:0031965//nuclear membrane;GO:0043186//P granule;GO:1990904//ribonucleoprotein complex	GO:0003676//nucleic acid binding;GO:0003723//RNA binding;GO:0003729//mRNA binding;GO:0003730//mRNA 3'-UTR binding	GO:0000381//regulation of alternative mRNA splicing, via spliceosome;GO:0006376//mRNA splice site selection;GO:0007281//germ cell development;GO:0007319//negative regulation of oskar mRNA translation;GO:0014881//regulation of myofibril size;GO:0017148//negative regulation of translation;GO:0031536//positive regulation of exit from mitosis;GO:0036099//female germ-line stem cell population maintena…	--
FBgn0053301	415	247	252	742	726	706	17.916	10.72	11.82	29.486	29.2	31.254	13.4853	29.98	1.15261	7.42476e-10	1.18207e-08	CG33301	-	-	-	-	-	-	-	-	--
FBgn0000808	334	345	270	96	144	115	10.002	10.313	8.784	2.634	3.962	3.51	9.69967	3.36867	-1.52576	7.45749e-10	1.18439e-08	gd	gastrulation-defective	-	-	-	-	GO:0005576//extracellular region;GO:0098595//perivitelline space	GO:0004252//serine-type endopeptidase activity	GO:0006508//proteolysis;GO:0007370//ventral furrow formation;GO:0008063//Toll signaling pathway;GO:0009950//dorsal/ventral axis specification;GO:0009953//dorsal/ventral pattern formation;GO:0031638//zymogen activation;GO:0045752//positive regulation of Toll signaling pathway	--
FBgn0035480	172	213	231	444	474	441	17.065	21.241	24.893	40.137	43.291	44.262	21.0663	42.5633	1.01467	7.6152e-10	1.2065e-08	CG14984	NP_001261386.1 uncharacterized protein Dmel_CG14984, isoform C [Drosophila melanogaster]	-	-	-	-	-	-	-	--
FBgn0004240	501	361	126	4026	2967	3436	58.024	42.023	15.85	426.977	317.461	405.573	38.6323	383.337	3.31073	8.0597e-10	1.26921e-08	DptA	Diptericin A	Organismal Systems	Immune system	ko04624//Toll and Imd signaling pathway	K20669	GO:0005615//extracellular space	-	GO:0009617//response to bacterium;GO:0019731//antibacterial humoral response;GO:0042742//defense response to bacterium;GO:0045087//innate immune response;GO:0045089//positive regulation of innate immune response;GO:0050829//defense response to Gram-negative bacterium;GO:0055093//response to hyperoxia	--
FBgn0040477	722	567	473	142	238	264	40.862	32.254	29.076	7.359	12.444	15.228	34.064	11.677	-1.54458	8.48226e-10	1.33253e-08	cid	centromere identifier	-	-	-	-	GO:0000775//chromosome, centromeric region;GO:0000776//kinetochore;GO:0000786//nucleosome;GO:0005634//nucleus;GO:0043505//CENP-A containing nucleosome	GO:0003677//DNA binding;GO:0030527//structural constituent of chromatin;GO:0046982//protein heterodimerization activity	GO:0000278//mitotic cell cycle;GO:0007059//chromosome segregation;GO:0007080//mitotic metaphase plate congression;GO:0051225//spindle assembly;GO:0051382//kinetochore assembly;GO:0051383//kinetochore organization	--
FBgn0085317	59	39	43	177	186	141	7.774	5.165	6.153	21.355	22.64	18.933	6.364	20.976	1.72073	8.88396e-10	1.38894e-08	CG34288	ABN49380.1 IP18279p, partial [Drosophila melanogaster]	-	-	-	-	-	-	-	--
FBgn0025525	52	40	34	251	182	114	0.58	0.449	0.412	2.565	1.877	1.297	0.480333	1.913	1.99373	9.04542e-10	1.41249e-08	bab2	bric a brac 2	-	-	-	-	GO:0005634//nucleus;GO:0005700//polytene chromosome	GO:0003677//DNA binding;GO:0003680//minor groove of adenine-thymine-rich DNA binding;GO:0003700//DNA-binding transcription factor activity;GO:0005515//protein binding	GO:0006355//regulation of transcription, DNA-templated;GO:0006357//regulation of transcription by RNA polymerase II;GO:0007455//eye-antennal disc morphogenesis;GO:0007478//leg disc morphogenesis;GO:0061040//female gonad morphogenesis;GO:2000736//regulation of stem cell differentiation	ZBTB
FBgn0033113	211	149	214	512	497	385	7.599	5.391	8.371	16.886	16.537	14.132	7.12033	15.8517	1.15462	9.31613e-10	1.45303e-08	Spn42Dc	Serpin 42Dc	-	-	-	-	GO:0005615//extracellular space	GO:0004867//serine-type endopeptidase inhibitor activity	GO:0010951//negative regulation of endopeptidase activity;GO:0045861//negative regulation of proteolysis	--
FBgn0035918	1454	1194	1044	541	711	567	33.639	27.765	26.234	11.461	15.197	13.369	29.2127	13.3423	-1.13058	1.0401e-09	1.61067e-08	Cdc6	Cdc6	Cellular Processes;Human Diseases	Cell growth and death;Cancer: overview	ko04110//Cell cycle;ko05207//Chemical carcinogenesis - receptor activation	K02213;K02213	GO:0005634//nucleus	GO:0003688//DNA replication origin binding	GO:0000278//mitotic cell cycle;GO:0006270//DNA replication initiation;GO:0033314//mitotic DNA replication checkpoint signaling;GO:0051301//cell division	--
FBgn0030943	1800	1552	1264	735	794	869	82.787	71.745	63.143	30.955	33.737	40.734	72.5583	35.142	-1.04595	1.07828e-09	1.6619e-08	Nup35	Nucleoporin 35kDa	Genetic Information Processing	Translation	ko03013//Nucleocytoplasmic transport	K14313	GO:0031965//nuclear membrane;GO:0044613//nuclear pore central transport channel;GO:0044615//nuclear pore nuclear basket	GO:0003676//nucleic acid binding;GO:0003697//single-stranded DNA binding;GO:0005543//phospholipid binding;GO:0017056//structural constituent of nuclear pore	GO:0006355//regulation of transcription, DNA-templated;GO:0006607//NLS-bearing protein import into nucleus;GO:0006913//nucleocytoplasmic transport;GO:0006999//nuclear pore organization;GO:0051028//mRNA transport	--
FBgn0015396	905	640	820	355	423	350	13.468	9.573	13.255	4.838	5.816	5.309	12.0987	5.321	-1.18508	1.09538e-09	1.68428e-08	jumu	jumeau	-	-	-	-	GO:0000785//chromatin;GO:0000791//euchromatin;GO:0005634//nucleus;GO:0005700//polytene chromosome;GO:0005701//polytene chromosome chromocenter;GO:0005730//nucleolus	GO:0000976//transcription cis-regulatory region binding;GO:0003700//DNA-binding transcription factor activity;GO:0043565//sequence-specific DNA binding	GO:0006325//chromatin organization;GO:0006355//regulation of transcription, DNA-templated;GO:0007000//nucleolus organization;GO:0007391//dorsal closure;GO:0007476//imaginal disc-derived wing morphogenesis;GO:0035050//embryonic heart tube development;GO:0048749//compound eye development;GO:0050832//defense response to fungus;GO:0051302//regulation of cell division	Fork_head
FBgn0024288	34	33	26	127	143	110	0.953	0.93	0.792	3.26	3.704	3.143	0.891667	3.369	1.91774	1.11325e-09	1.70974e-08	Sox100B	Sox100B	-	-	-	-	GO:0005634//nucleus	GO:0000987//cis-regulatory region sequence-specific DNA binding;GO:0001228//DNA-binding transcription activator activity, RNA polymerase II-specific	GO:0008584//male gonad development;GO:0045944//positive regulation of transcription by RNA polymerase II	HMG
FBgn0030871	1802	1555	1292	735	871	837	84.572	73.352	65.86	31.588	37.765	40.035	74.5947	36.4627	-1.03265	1.17159e-09	1.78462e-08	CG8142	NP_573245.1 uncharacterized protein Dmel_CG8142 [Drosophila melanogaster]	Genetic Information Processing;Genetic Information Processing;Genetic Information Processing	Replication and repair;Replication and repair;Replication and repair	ko03420//Nucleotide excision repair;ko03030//DNA replication;ko03430//Mismatch repair	K10755;K10755;K10755	GO:0005634//nucleus;GO:0005663//DNA replication factor C complex;GO:0031391//Elg1 RFC-like complex	GO:0003677//DNA binding;GO:0005524//ATP binding;GO:0016887//ATP hydrolysis activity	GO:0006260//DNA replication;GO:0006261//DNA-dependent DNA replication;GO:0006281//DNA repair	--
FBgn0051778	102	137	172	525	346	325	6.063	8.204	10.887	28.118	18.507	19.008	8.38467	21.8777	1.38363	1.19561e-09	1.81908e-08	CG31778	NP_001285596.1 uncharacterized protein Dmel_CG31778, isoform B [Drosophila melanogaster]	-	-	-	-	-	GO:0004867//serine-type endopeptidase inhibitor activity	-	--
FBgn0005664	165	91	151	388	384	334	5.026	2.786	4.995	10.822	10.805	10.368	4.269	10.665	1.32091	1.21191e-09	1.84174e-08	Crys	Crystallin	-	-	-	-	GO:0005576//extracellular region;GO:0031012//extracellular matrix	GO:0005212//structural constituent of eye lens;GO:0005509//calcium ion binding;GO:0042302//structural constituent of cuticle	GO:0007601//visual perception;GO:0048058//compound eye corneal lens development	--
FBgn0025631	201	206	180	555	529	350	3.12	3.146	3.03	7.892	7.709	5.6	3.09867	7.067	1.18945	1.27148e-09	1.92776e-08	moody	moody	-	-	-	-	GO:0005886//plasma membrane;GO:0005919//pleated septate junction;GO:0016021//integral component of membrane	GO:0004930//G protein-coupled receptor activity	GO:0007186//G protein-coupled receptor signaling pathway;GO:0007419//ventral cord development;GO:0008366//axon ensheathment;GO:0019991//septate junction assembly;GO:0030866//cortical actin cytoskeleton organization;GO:0035095//behavioral response to nicotine;GO:0048148//behavioral response to cocaine;GO:0048149//behavioral response to ethanol;GO:0060857//establishment of glial blood-brain barrier	--
FBgn0038262	123	103	113	265	277	291	3.412	2.872	3.404	6.731	7.098	8.226	3.22933	7.35167	1.18683	1.37041e-09	2.06337e-08	CG14857	NP_650392.1 uncharacterized protein Dmel_CG14857 [Drosophila melanogaster]	-	-	-	-	GO:0016021//integral component of membrane	GO:0022857//transmembrane transporter activity	GO:0055085//transmembrane transport	--
FBgn0041004	782	813	937	387	499	393	27.304	28.427	35.481	11.936	15.208	13.618	30.404	13.5873	-1.162	1.37724e-09	2.07126e-08	CG17715	NP_001036410.1 uncharacterized protein Dmel_CG17715, isoform D [Drosophila melanogaster]	-	-	-	-	GO:0016021//integral component of membrane	-	-	--
FBgn0010300	1511	969	1057	416	638	476	17.744	11.585	13.665	4.455	6.776	5.661	14.3313	5.63067	-1.3478	1.41819e-09	2.12599e-08	brat	brain tumor	-	-	-	-	GO:0005737//cytoplasm;GO:0005829//cytosol;GO:0043025//neuronal cell body;GO:0045179//apical cortex;GO:0045180//basal cortex;GO:0099738//cell cortex region	GO:0003730//mRNA 3'-UTR binding;GO:0005515//protein binding;GO:0008270//zinc ion binding;GO:0030371//translation repressor activity;GO:0045182//translation regulator activity	GO:0006417//regulation of translation;GO:0007400//neuroblast fate determination;GO:0007402//ganglion mother cell fate determination;GO:0007405//neuroblast proliferation;GO:0007406//negative regulation of neuroblast proliferation;GO:0007419//ventral cord development;GO:0007420//brain development;GO:0008285//negative regulation of cell population proliferation;GO:0008356//asymmetric cell division;G…	--
FBgn0051974	784	1180	1464	2889	2444	2265	31.594	47.996	63.731	106.759	90.415	93.847	47.7737	97.007	1.02187	1.41852e-09	2.12599e-08	CG31974	NP_001259800.1 uncharacterized protein Dmel_CG31974, isoform D [Drosophila melanogaster]	-	-	-	-	-	-	-	--
FBgn0015320	796	658	767	402	399	339	29.083	24.148	30.522	13.459	13.389	12.55	27.9177	13.1327	-1.08802	1.44753e-09	2.16698e-08	Ubc2	Ubiquitin conjugating enzyme 2	Genetic Information Processing	Folding, sorting and degradation	ko04120//Ubiquitin mediated proteolysis	K20217	GO:0005634//nucleus	GO:0004842//ubiquitin-protein transferase activity;GO:0005524//ATP binding;GO:0016740//transferase activity;GO:0061631//ubiquitin conjugating enzyme activity	GO:0000209//protein polyubiquitination;GO:0019915//lipid storage	--
FBgn0005696	1765	1439	1253	657	815	808	49.076	40.216	37.841	16.728	20.935	22.897	42.3777	20.1867	-1.0699	1.4733e-09	2.20181e-08	DNApol-alpha73	DNA polymerase alpha 73kD subunit	Genetic Information Processing	Replication and repair	ko03030//DNA replication	K02321	GO:0005634//nucleus;GO:0005635//nuclear envelope;GO:0005658//alpha DNA polymerase:primase complex	GO:0003677//DNA binding	GO:0006260//DNA replication;GO:0006261//DNA-dependent DNA replication;GO:0006270//DNA replication initiation	--
FBgn0020300	53	44	62	220	200	137	2.31	1.928	2.935	8.781	8.053	6.086	2.391	7.64	1.67596	1.49085e-09	2.22162e-08	geko	geko	-	-	-	-	GO:0016021//integral component of membrane	-	GO:0007608//sensory perception of smell;GO:0048149//behavioral response to ethanol	--
FBgn0003082	1544	1368	1140	652	798	663	48.86	43.417	38.917	18.911	23.293	21.455	43.7313	21.2197	-1.04327	1.50982e-09	2.24467e-08	phr	photorepair	-	-	-	-	-	GO:0003677//DNA binding;GO:0003904//deoxyribodipyrimidine photo-lyase activity	GO:0000719//photoreactive repair;GO:0006281//DNA repair	--
MSTRG.7370	17	24	30	96	131	111	1.574	2.188	3.003	8.031	11.044	10.324	2.255	9.79967	2.11961	1.6064e-09	2.38291e-08	env	SD01615p [Drosophila melanogaster]	-	-	-	-	-	-	-	--
FBgn0037934	666	684	1140	2351	1836	1619	13.757	14.201	25.577	44.47	35.037	34.083	17.845	37.8633	1.08528	1.60872e-09	2.38365e-08	CG6830	NP_650103.1 uncharacterized protein Dmel_CG6830 [Drosophila melanogaster]	-	-	-	-	-	-	-	--
FBgn0032817	251	201	209	637	597	388	1.188	0.957	1.075	2.762	2.611	1.872	1.07333	2.415	1.16993	1.63321e-09	2.41444e-08	CG10631	NP_609998.1 uncharacterized protein Dmel_CG10631 [Drosophila melanogaster]	-	-	-	-	GO:0005634//nucleus	GO:0003714//transcription corepressor activity;GO:0043565//sequence-specific DNA binding;GO:0046872//metal ion binding	GO:0000122//negative regulation of transcription by RNA polymerase II	THAP
FBgn0015625	4432	3386	3380	1790	2345	1829	102.396	78.558	84.241	37.242	49.712	42.184	88.3983	43.046	-1.03814	1.69109e-09	2.49719e-08	CycB3	Cyclin B3	Environmental Information Processing	Signal transduction	ko04068//FoxO signaling pathway	K21771	GO:0000307//cyclin-dependent protein kinase holoenzyme complex;GO:0005634//nucleus;GO:0005737//cytoplasm;GO:0005813//centrosome;GO:0042025//host cell nucleus	GO:0016538//cyclin-dependent protein serine/threonine kinase regulator activity;GO:0016740//transferase activity;GO:0019901//protein kinase binding	GO:0000079//regulation of cyclin-dependent protein serine/threonine kinase activity;GO:0000278//mitotic cell cycle;GO:0000281//mitotic cytokinesis;GO:0010389//regulation of G2/M transition of mitotic cell cycle;GO:0035186//syncytial blastoderm mitotic cell cycle;GO:0035561//regulation of chromatin binding;GO:0044772//mitotic cell cycle phase transition	--
FBgn0040733	725	615	1170	2047	2385	1611	210.341	179.339	368.688	543.833	639.26	476.352	252.789	553.148	1.12973	1.73912e-09	2.55954e-08	BomS6	Bomanin S6	-	-	-	-	GO:0005576//extracellular region	-	GO:0006952//defense response;GO:0045087//innate immune response	--
FBgn0053460	24	27	36	132	119	112	1.457	1.648	2.374	7.34	6.676	6.931	1.82633	6.98233	1.93476	1.73921e-09	2.55954e-08	CG33460	NP_001033949.1 uncharacterized protein Dmel_CG33460 [Drosophila melanogaster]	-	-	-	-	-	GO:0004252//serine-type endopeptidase activity;GO:0016787//hydrolase activity	GO:0006508//proteolysis	--
FBgn0038849	62	89	148	316	370	290	3.414	4.976	9.006	16.959	18.936	17.301	5.79867	17.732	1.61256	1.76435e-09	2.59361e-08	CG7079	NP_001287436.1 uncharacterized protein Dmel_CG7079, isoform B [Drosophila melanogaster]	-	-	-	-	GO:0005615//extracellular space	-	-	--
FBgn0024807	202	169	266	667	614	396	3.704	3.479	5.751	11.287	10.954	7.611	4.31133	9.95067	1.20666	1.8683e-09	2.73409e-08	DIP1	DISCO Interacting Protein 1	-	-	-	-	GO:0005634//nucleus;GO:0005730//nucleolus;GO:0005737//cytoplasm	GO:0003725//double-stranded RNA binding;GO:0003726//double-stranded RNA adenosine deaminase activity;GO:0008251//tRNA-specific adenosine deaminase activity;GO:0070883//pre-miRNA binding;GO:0097157//pre-mRNA intronic binding	GO:0006382//adenosine to inosine editing;GO:0006396//RNA processing;GO:0051607//defense response to virus;GO:0098586//cellular response to virus;GO:1990261//pre-mRNA catabolic process	--
FBgn0038733	118	166	186	412	458	331	3.789	5.358	6.487	12.114	13.587	10.832	5.21133	12.1777	1.22451	1.87555e-09	2.74163e-08	CG11407	NP_650831.1 uncharacterized protein Dmel_CG11407 [Drosophila melanogaster]	-	-	-	-	-	GO:0004467//long-chain fatty acid-CoA ligase activity;GO:0015645//fatty acid ligase activity;GO:0016405//CoA-ligase activity	GO:0001676//long-chain fatty acid metabolic process;GO:0006633//fatty acid biosynthetic process;GO:0046949//fatty-acyl-CoA biosynthetic process	--
FBgn0029798	1853	1688	1220	792	810	833	32.162	29.225	22.994	12.55	12.906	14.71	28.127	13.3887	-1.07094	1.88042e-09	2.74566e-08	CG4078	NP_001259262.1 uncharacterized protein Dmel_CG4078, isoform B [Drosophila melanogaster]	-	-	-	-	GO:0005634//nucleus	GO:0003676//nucleic acid binding;GO:0003677//DNA binding;GO:0003678//DNA helicase activity;GO:0004386//helicase activity;GO:0005524//ATP binding;GO:0016818//hydrolase activity, acting on acid anhydrides, in phosphorus-containing anhydrides;GO:0046872//metal ion binding;GO:0051539//4 iron, 4 sulfur cluster binding;GO:0070182//DNA polymerase binding	GO:0000723//telomere maintenance;GO:0006139//nucleobase-containing compound metabolic process;GO:0006260//DNA replication;GO:0006281//DNA repair;GO:0006310//DNA recombination;GO:0010569//regulation of double-strand break repair via homologous recombination;GO:0032508//DNA duplex unwinding;GO:0045910//negative regulation of DNA recombination;GO:0090657//telomeric loop disassembly;GO:1904430//negat…	--
FBgn0052066	657	566	503	270	253	305	17.857	15.473	14.86	6.703	6.351	8.455	16.0633	7.16967	-1.16379	1.96258e-09	2.86242e-08	CG32066	NP_729619.1 uncharacterized protein Dmel_CG32066, isoform B [Drosophila melanogaster]	-	-	-	-	GO:0016020//membrane;GO:0098595//perivitelline space	GO:0031267//small GTPase binding	GO:0030833//regulation of actin filament polymerization	--
FBgn0032536	97	105	149	393	334	257	1.852	1.999	3.119	6.935	5.93	5.03	2.32333	5.965	1.36033	2.03206e-09	2.93224e-08	Ance-3	Ance-3	Human Diseases;Human Diseases;Organismal Systems;Organismal Systems;Human Diseases;Human Diseases	Cardiovascular disease;Cardiovascular disease;Endocrine system;Endocrine system;Infectious disease: parasitic;Infectious disease: viral	ko05415//Diabetic cardiomyopathy;ko05410//Hypertrophic cardiomyopathy;ko04924//Renin secretion;ko04614//Renin-angiotensin system;ko05142//Chagas disease;ko05171//Coronavirus disease - COVID-19	K01283;K01283;K01283;K01283;K01283;K01283	GO:0005886//plasma membrane;GO:0016020//membrane;GO:0016021//integral component of membrane	GO:0008237//metallopeptidase activity;GO:0008241//peptidyl-dipeptidase activity;GO:0046872//metal ion binding	GO:0006508//proteolysis	--
FBgn0053832	852	826	758	331	431	462	99.328	96.705	95.928	35.292	46.4	54.816	97.3203	45.5027	-1.09679	2.03744e-09	2.93224e-08	His2A:CG33832	His2A:CG33832	-	-	-	-	GO:0000786//nucleosome;GO:0005634//nucleus;GO:0005694//chromosome;GO:0005700//polytene chromosome;GO:0005704//polytene chromosome band	GO:0003677//DNA binding;GO:0030527//structural constituent of chromatin;GO:0046982//protein heterodimerization activity	GO:0006325//chromatin organization;GO:0006334//nucleosome assembly;GO:0007526//larval somatic muscle development	--
FBgn0053835	852	826	758	331	431	462	99.328	96.705	95.928	35.292	46.4	54.816	97.3203	45.5027	-1.09679	2.03744e-09	2.93224e-08	His2A:CG33835	His2A:CG33835	-	-	-	-	GO:0000786//nucleosome;GO:0005634//nucleus;GO:0005694//chromosome;GO:0005700//polytene chromosome;GO:0005704//polytene chromosome band	GO:0003677//DNA binding;GO:0030527//structural constituent of chromatin;GO:0046982//protein heterodimerization activity	GO:0006325//chromatin organization;GO:0006334//nucleosome assembly;GO:0007526//larval somatic muscle development	--
FBgn0053838	852	826	758	331	431	462	99.328	96.705	95.928	35.292	46.4	54.816	97.3203	45.5027	-1.09679	2.03744e-09	2.93224e-08	His2A:CG33838	His2A:CG33838	-	-	-	-	GO:0000786//nucleosome;GO:0005634//nucleus;GO:0005694//chromosome;GO:0005700//polytene chromosome;GO:0005704//polytene chromosome band	GO:0003677//DNA binding;GO:0030527//structural constituent of chromatin;GO:0046982//protein heterodimerization activity	GO:0006325//chromatin organization;GO:0006334//nucleosome assembly;GO:0007526//larval somatic muscle development	--
FBgn0053841	852	826	758	331	431	462	99.328	96.705	95.928	35.292	46.4	54.816	97.3203	45.5027	-1.09679	2.03744e-09	2.93224e-08	His2A:CG33841	His2A:CG33841	-	-	-	-	GO:0000786//nucleosome;GO:0005634//nucleus;GO:0005694//chromosome;GO:0005700//polytene chromosome;GO:0005704//polytene chromosome band	GO:0003677//DNA binding;GO:0030527//structural constituent of chromatin;GO:0046982//protein heterodimerization activity	GO:0006325//chromatin organization;GO:0006334//nucleosome assembly;GO:0007526//larval somatic muscle development	--
FBgn0053844	852	826	758	331	431	462	99.328	96.705	95.928	35.292	46.4	54.816	97.3203	45.5027	-1.09679	2.03744e-09	2.93224e-08	His2A:CG33844	His2A:CG33844	-	-	-	-	GO:0000786//nucleosome;GO:0005634//nucleus;GO:0005694//chromosome;GO:0005700//polytene chromosome;GO:0005704//polytene chromosome band	GO:0003677//DNA binding;GO:0030527//structural constituent of chromatin;GO:0046982//protein heterodimerization activity	GO:0006325//chromatin organization;GO:0006334//nucleosome assembly;GO:0007526//larval somatic muscle development	--
FBgn0053847	852	826	758	331	431	462	99.328	96.705	95.928	35.292	46.4	54.816	97.3203	45.5027	-1.09679	2.03744e-09	2.93224e-08	His2A:CG33847	His2A:CG33847	-	-	-	-	GO:0000786//nucleosome;GO:0005634//nucleus;GO:0005694//chromosome;GO:0005700//polytene chromosome;GO:0005704//polytene chromosome band	GO:0003677//DNA binding;GO:0030527//structural constituent of chromatin;GO:0046982//protein heterodimerization activity	GO:0006325//chromatin organization;GO:0006334//nucleosome assembly;GO:0007526//larval somatic muscle development	--
FBgn0053850	852	826	758	331	431	462	99.328	96.705	95.928	35.292	46.4	54.816	97.3203	45.5027	-1.09679	2.03744e-09	2.93224e-08	His2A:CG33850	His2A:CG33850	-	-	-	-	GO:0000786//nucleosome;GO:0005634//nucleus;GO:0005694//chromosome;GO:0005700//polytene chromosome;GO:0005704//polytene chromosome band	GO:0003677//DNA binding;GO:0030527//structural constituent of chromatin;GO:0046982//protein heterodimerization activity	GO:0006325//chromatin organization;GO:0006334//nucleosome assembly;GO:0007526//larval somatic muscle development	--
FBgn0053862	852	826	758	331	431	462	99.328	96.705	95.928	35.292	46.4	54.816	97.3203	45.5027	-1.09679	2.03744e-09	2.93224e-08	His2A:CG33862	His2A:CG33862	-	-	-	-	GO:0000786//nucleosome;GO:0005634//nucleus;GO:0005694//chromosome;GO:0005700//polytene chromosome;GO:0005704//polytene chromosome band	GO:0003677//DNA binding;GO:0030527//structural constituent of chromatin;GO:0046982//protein heterodimerization activity	GO:0006325//chromatin organization;GO:0006334//nucleosome assembly;GO:0007526//larval somatic muscle development	--
FBgn0053865	852	826	758	331	431	462	99.328	96.705	95.928	35.292	46.4	54.816	97.3203	45.5027	-1.09679	2.03744e-09	2.93224e-08	His2A:CG33865	His2A:CG33865	-	-	-	-	GO:0000786//nucleosome;GO:0005634//nucleus;GO:0005694//chromosome;GO:0005700//polytene chromosome;GO:0005704//polytene chromosome band	GO:0003677//DNA binding;GO:0030527//structural constituent of chromatin;GO:0046982//protein heterodimerization activity	GO:0006325//chromatin organization;GO:0006334//nucleosome assembly;GO:0007526//larval somatic muscle development	--
FBgn0052369	45	59	44	197	162	143	0.593	0.598	0.586	1.819	1.509	1.763	0.592333	1.697	1.51851	2.22186e-09	3.19062e-08	CG32369	NP_001246660.1 uncharacterized protein Dmel_CG32369, isoform C [Drosophila melanogaster]	-	-	-	-	-	GO:0005515//protein binding;GO:0008270//zinc ion binding	-	--
FBgn0038071	77	86	91	247	255	195	1.795	2.015	2.304	5.273	5.492	4.633	2.038	5.13267	1.33255	2.30165e-09	3.30157e-08	Dtg	Dpp target gene	-	-	-	-	GO:0009986//cell surface;GO:0016021//integral component of membrane;GO:0031982//vesicle	-	GO:0007369//gastrulation	--
FBgn0032809	14	16	19	104	85	79	0.884	1.015	1.303	6.012	4.957	5.083	1.06733	5.35067	2.32571	2.36027e-09	3.37822e-08	CG13078	NP_609989.1 uncharacterized protein Dmel_CG13078 [Drosophila melanogaster]	-	-	-	-	GO:0016021//integral component of membrane	GO:0016491//oxidoreductase activity;GO:0020037//heme binding;GO:0140575//transmembrane monodehydroascorbate reductase activity	-	--
FBgn0035049	186	150	175	448	433	323	3.938	3.009	3.944	8.021	7.914	6.504	3.63033	7.47967	1.04287	2.48686e-09	3.54773e-08	Mmp1	Matrix metalloproteinase 1	Organismal Systems;Organismal Systems;Environmental Information Processing	Endocrine system;Endocrine system;Signal transduction	ko04928//Parathyroid hormone synthesis, secretion and action;ko04912//GnRH signaling pathway;ko04668//TNF signaling pathway	K07763;K07763;K07763	GO:0005615//extracellular space;GO:0030425//dendrite;GO:0031012//extracellular matrix;GO:0062023//collagen-containing extracellular matrix	GO:0004222//metalloendopeptidase activity;GO:0008237//metallopeptidase activity;GO:0008270//zinc ion binding	GO:0002168//instar larval development;GO:0003144//embryonic heart tube formation;GO:0006508//proteolysis;GO:0007155//cell adhesion;GO:0007419//ventral cord development;GO:0007424//open tracheal system development;GO:0007505//adult fat body development;GO:0007561//imaginal disc eversion;GO:0007591//molting cycle, chitin-based cuticle;GO:0030198//extracellular matrix organization;GO:0030574//collag…	--
FBgn0039301	807	692	603	315	380	345	41.877	36.093	33.987	14.968	18.209	18.234	37.319	17.137	-1.1228	2.50907e-09	3.5755e-08	Nup37	Nucleoporin 37kD	Genetic Information Processing	Translation	ko03013//Nucleocytoplasmic transport	K14302	GO:0031080//nuclear pore outer ring	GO:0005515//protein binding	GO:0015031//protein transport;GO:0051028//mRNA transport	--
FBgn0053087	274	265	289	713	658	462	0.999	0.971	1.143	2.38	2.215	1.715	1.03767	2.10333	1.01933	2.59807e-09	3.69425e-08	LRP1	LDL receptor protein 1	Human Diseases;Organismal Systems;Human Diseases	Neurodegenerative disease;Digestive system;Infectious disease: parasitic	ko05010//Alzheimer disease;ko04979//Cholesterol metabolism;ko05144//Malaria	K04550;K04550;K04550	GO:0005829//cytosol;GO:0016021//integral component of membrane	GO:0005509//calcium ion binding;GO:0005515//protein binding	GO:0006897//endocytosis	--
FBgn0250851	174	154	180	495	423	316	1.583	1.445	1.803	4.177	3.547	2.955	1.61033	3.55967	1.14438	2.66715e-09	3.77601e-08	CG33981	NP_001033954.1 uncharacterized protein Dmel_CG33981, isoform A [Drosophila melanogaster]	Genetic Information Processing	Folding, sorting and degradation	ko04120//Ubiquitin mediated proteolysis	K12456	GO:0005680//anaphase-promoting complex	-	GO:0007049//cell cycle;GO:0070979//protein K11-linked ubiquitination	--
FBgn0085282	46	45	104	273	252	205	5.46	5.368	13.407	29.671	27.632	24.797	8.07833	27.3667	1.76029	2.96401e-09	4.16912e-08	CG34253	NP_001097636.1 uncharacterized protein Dmel_CG34253 [Drosophila melanogaster]	-	-	-	-	-	-	-	--
FBgn0037853	279	286	179	552	565	562	9.761	10.057	6.802	17.684	18.261	20.038	8.87333	18.661	1.07248	3.13646e-09	4.39273e-08	CG14696	NP_650035.1 uncharacterized protein Dmel_CG14696 [Drosophila melanogaster]	-	-	-	-	GO:0005737//cytoplasm	-	GO:0015031//protein transport	--
FBgn0034437	174	145	161	360	339	358	3.611	3.025	3.629	6.841	6.5	7.572	3.42167	6.971	1.02667	3.19464e-09	4.46942e-08	CG10051	NP_611414.1 uncharacterized protein Dmel_CG10051 [Drosophila melanogaster]	-	-	-	-	GO:0016021//integral component of membrane	GO:0008235//metalloexopeptidase activity	GO:0006508//proteolysis	--
FBgn0030683	474	367	374	183	174	192	17.704	13.778	15.172	6.259	6.004	7.309	15.5513	6.524	-1.25321	3.56063e-09	4.96015e-08	Mvd	Mevalonate diphosphate decarboxylase	Metabolism;Metabolism	Global and overview maps;Metabolism of terpenoids and polyketides	ko01100//Metabolic pathways;ko00900//Terpenoid backbone biosynthesis	K01597;K01597	GO:0005829//cytosol	GO:0004163//diphosphomevalonate decarboxylase activity;GO:0005524//ATP binding;GO:0016831//carboxy-lyase activity	GO:0006695//cholesterol biosynthetic process;GO:0008299//isoprenoid biosynthetic process;GO:0019287//isopentenyl diphosphate biosynthetic process, mevalonate pathway	--
FBgn0034314	912	848	849	392	473	521	33.666	31.483	33.914	13.278	16.138	19.568	33.021	16.328	-1.01604	3.66365e-09	5.09279e-08	nopo	no poles	-	-	-	-	GO:0005634//nucleus;GO:0005764//lysosome	GO:0004842//ubiquitin-protein transferase activity;GO:0008270//zinc ion binding;GO:0031624//ubiquitin conjugating enzyme binding;GO:0061630//ubiquitin protein ligase activity;GO:0070182//DNA polymerase binding	GO:0008219//cell death;GO:0016567//protein ubiquitination;GO:0045977//positive regulation of mitotic cell cycle, embryonic;GO:1905146//lysosomal protein catabolic process	--
FBgn0038099	1365	1179	939	450	635	593	41.709	36.209	31.164	12.591	17.925	18.467	36.3607	16.3277	-1.15506	3.94874e-09	5.46578e-08	CG7091	NP_650243.2 uncharacterized protein Dmel_CG7091 [Drosophila melanogaster]	-	-	-	-	GO:0016021//integral component of membrane	GO:0022857//transmembrane transporter activity	GO:0006820//anion transport;GO:0055085//transmembrane transport	--
FBgn0002431	367	313	403	1083	989	569	2.323	1.991	2.77	6.276	5.782	3.67	2.36133	5.24267	1.1507	3.98028e-09	5.5036e-08	hyd	hyperplastic discs	Genetic Information Processing	Folding, sorting and degradation	ko04120//Ubiquitin mediated proteolysis	K10593	GO:0005634//nucleus;GO:0005737//cytoplasm	GO:0003723//RNA binding;GO:0004842//ubiquitin-protein transferase activity;GO:0008270//zinc ion binding;GO:0034450//ubiquitin-ubiquitin ligase activity;GO:0043130//ubiquitin binding;GO:0061630//ubiquitin protein ligase activity	GO:0000209//protein polyubiquitination;GO:0006974//cellular response to DNA damage stimulus;GO:0007112//male meiosis cytokinesis;GO:0007283//spermatogenesis;GO:0007289//spermatid nucleus differentiation;GO:0007444//imaginal disc development;GO:0007446//imaginal disc growth;GO:0007455//eye-antennal disc morphogenesis;GO:0008585//female gonad development;GO:0035220//wing disc development;GO:0070936…	--
FBgn0039640	10575	8959	6675	3408	4968	4604	173.488	147.861	119.144	51.297	75.493	76.899	146.831	67.8963	-1.11275	4.06215e-09	5.61084e-08	CG14516	NP_651674.3 uncharacterized protein Dmel_CG14516, isoform B [Drosophila melanogaster]	Metabolism;Metabolism	Global and overview maps;Metabolism of other amino acids	ko01100//Metabolic pathways;ko00480//Glutathione metabolism	K11140;K11140	GO:0005737//cytoplasm;GO:0016021//integral component of membrane	GO:0008237//metallopeptidase activity;GO:0008270//zinc ion binding;GO:0042277//peptide binding;GO:0070006//metalloaminopeptidase activity	GO:0006508//proteolysis;GO:0043171//peptide catabolic process	--
FBgn0265186	1817	1251	843	3236	2895	2847	56.11	38.859	28.301	91.515	82.664	89.639	41.09	87.9393	1.09772	4.27699e-09	5.88267e-08	CG44251	NP_725246.1 uncharacterized protein Dmel_CG44251, isoform A [Drosophila melanogaster]	-	-	-	-	-	-	-	--
FBgn0020248	761	729	707	338	438	285	22.965	22.177	23.241	9.342	12.169	8.722	22.7943	10.0777	-1.17751	4.33587e-09	5.9511e-08	stet	stem cell tumor	-	-	-	-	GO:0005794//Golgi apparatus;GO:0016021//integral component of membrane;GO:0030173//integral component of Golgi membrane	GO:0004252//serine-type endopeptidase activity;GO:0005509//calcium ion binding	GO:0016485//protein processing;GO:0036098//male germ-line stem cell population maintenance;GO:0038004//epidermal growth factor receptor ligand maturation	--
FBgn0261811	1724	1295	1101	652	756	528	16.75	12.134	11.316	5.311	6.347	4.911	13.4	5.523	-1.27871	4.37838e-09	6.00312e-08	pico	pico	Organismal Systems	Development and regeneration	ko04361//Axon regeneration	K23488	-	GO:0008157//protein phosphatase 1 binding;GO:0019904//protein domain specific binding	GO:0007015//actin filament organization;GO:0007165//signal transduction;GO:0007444//imaginal disc development;GO:0008361//regulation of cell size;GO:0048639//positive regulation of developmental growth;GO:0051491//positive regulation of filopodium assembly;GO:0051781//positive regulation of cell division	--
FBgn0263355	1769	1597	1268	818	911	734	29.927	27.204	23.385	12.723	14.194	12.679	26.8387	13.1987	-1.02392	4.93636e-09	6.72573e-08	CG31688	NP_001260624.1 uncharacterized protein Dmel_CG31688, isoform E [Drosophila melanogaster]	-	-	-	-	-	-	-	--
FBgn0028396	1027	1977	3025	14356	10427	11023	101.893	197.148	325.976	1304.27	955.73	1114.6	208.339	1124.87	2.43275	4.99735e-09	6.80171e-08	TotA	Turandot A	-	-	-	-	GO:0005576//extracellular region;GO:0005615//extracellular space	-	GO:0002376//immune system process;GO:0006979//response to oxidative stress;GO:0009408//response to heat;GO:0009409//response to cold;GO:0009411//response to UV;GO:0009414//response to water deprivation;GO:0009612//response to mechanical stimulus;GO:0009617//response to bacterium;GO:0034599//cellular response to oxidative stress;GO:0034605//cellular response to heat;GO:0034644//cellular response t…	--
FBgn0034484	122	166	155	391	380	295	3.434	4.696	4.738	10.077	9.881	8.462	4.28933	9.47333	1.14312	5.0201e-09	6.82556e-08	CG11044	NP_611456.1 uncharacterized protein Dmel_CG11044 [Drosophila melanogaster]	-	-	-	-	GO:0019005//SCF ubiquitin ligase complex	GO:0005515//protein binding	GO:0031146//SCF-dependent proteasomal ubiquitin-dependent protein catabolic process	--
FBgn0039324	190	180	304	674	592	448	7.569	7.207	13.154	24.587	21.788	18.189	9.31	21.5213	1.20891	5.1199e-09	6.95399e-08	CG10553	NP_651383.1 uncharacterized protein Dmel_CG10553 [Drosophila melanogaster]	-	-	-	-	-	-	-	--
FBgn0028292	1360	1147	1095	592	739	631	31.648	27.04	27.596	12.443	15.792	14.829	28.7613	14.3547	-1.00261	5.17474e-09	7.01387e-08	ric8a	ric8a	-	-	-	-	GO:0005737//cytoplasm;GO:0005829//cytosol;GO:0005938//cell cortex	GO:0001965//G-protein alpha-subunit binding;GO:0005085//guanyl-nucleotide exchange factor activity;GO:0005096//GTPase activator activity	GO:0007163//establishment or maintenance of cell polarity;GO:0007186//G protein-coupled receptor signaling pathway;GO:0008104//protein localization;GO:0008356//asymmetric cell division;GO:0010004//gastrulation involving germ band extension;GO:0040001//establishment of mitotic spindle localization;GO:0050821//protein stabilization;GO:0055057//neuroblast division	--
FBgn0036015	505	691	505	980	1153	1603	34.701	47.724	37.69	61.664	73.194	112.26	40.0383	82.3727	1.04078	5.60592e-09	7.5512e-08	CG3088	NP_648334.1 uncharacterized protein Dmel_CG3088 [Drosophila melanogaster]	-	-	-	-	-	GO:0004252//serine-type endopeptidase activity	GO:0006508//proteolysis	--
FBgn0030242	603	474	559	270	291	247	15.246	12.046	15.351	6.251	6.797	6.365	14.2143	6.471	-1.13529	5.66053e-09	7.61689e-08	sofe	sister of feo	-	-	-	-	GO:0005737//cytoplasm;GO:0005819//spindle;GO:1990023//mitotic spindle midzone	GO:0008017//microtubule binding	GO:0000226//microtubule cytoskeleton organization;GO:0000281//mitotic cytokinesis;GO:0007186//G protein-coupled receptor signaling pathway;GO:0051256//mitotic spindle midzone assembly	--
FBgn0003028	1448	1054	1023	581	656	455	13.944	10.214	10.717	5.099	5.853	4.472	11.625	5.14133	-1.17702	5.68328e-09	7.63962e-08	ovo	ovo	-	-	-	-	GO:0005634//nucleus;GO:0005654//nucleoplasm;GO:0005737//cytoplasm	GO:0001223//transcription coactivator binding;GO:0001227//DNA-binding transcription repressor activity, RNA polymerase II-specific;GO:0001228//DNA-binding transcription activator activity, RNA polymerase II-specific;GO:0003677//DNA binding;GO:0043565//sequence-specific DNA binding;GO:0046872//metal ion binding	GO:0000122//negative regulation of transcription by RNA polymerase II;GO:0007010//cytoskeleton organization;GO:0008343//adult feeding behavior;GO:0008360//regulation of cell shape;GO:0009913//epidermal cell differentiation;GO:0016348//imaginal disc-derived leg joint morphogenesis;GO:0018992//germ-line sex determination;GO:0035017//cuticle pattern formation;GO:0035316//non-sensory hair organizatio…	zf-C2H2
FBgn0051704	141	85	75	288	333	258	25.648	15.359	14.11	47.463	55.707	48.117	18.3723	50.429	1.45672	5.73506e-09	7.70129e-08	CG31704	NP_001260397.1 uncharacterized protein Dmel_CG31704, isoform B [Drosophila melanogaster]	-	-	-	-	GO:0005615//extracellular space	GO:0005515//protein binding	GO:0032504//multicellular organism reproduction	--
FBgn0267336	46	55	62	209	170	145	0.551	0.707	0.73	2.324	5.27	1.714	0.662667	3.10267	2.22715	5.75807e-09	7.72423e-08	Glut4EF	Glucose transporter 4 enhancer factor	-	-	-	-	-	-	GO:0008643//carbohydrate transport	--
FBgn0052302	107	164	74	435	258	413	5.697	8.776	4.279	21.207	12.69	22.409	6.25067	18.7687	1.58624	5.98242e-09	8.00049e-08	CG32302	ACX47661.1 FI09530p, partial [Drosophila melanogaster]	-	-	-	-	GO:0005576//extracellular region	GO:0008061//chitin binding	-	--
FBgn0032835	2074	1613	1476	5494	3634	2722	112.116	86.73	85.473	272.919	181.088	149.119	94.773	201.042	1.08495	6.08273e-09	8.11799e-08	CG16772	NP_001286092.1 uncharacterized protein Dmel_CG16772, isoform B [Drosophila melanogaster]	-	-	-	-	-	-	-	--
FBgn0020307	136	115	120	307	319	257	1.708	1.393	1.909	3.452	3.793	3.567	1.67	3.604	1.10975	6.09753e-09	8.12942e-08	dve	defective proventriculus	-	-	-	-	GO:0005634//nucleus;GO:0005829//cytosol	GO:0000977//RNA polymerase II transcription regulatory region sequence-specific DNA binding;GO:0003677//DNA binding;GO:0003700//DNA-binding transcription factor activity	GO:0000122//negative regulation of transcription by RNA polymerase II;GO:0006338//chromatin remodeling;GO:0006355//regulation of transcription, DNA-templated;GO:0006357//regulation of transcription by RNA polymerase II;GO:0007476//imaginal disc-derived wing morphogenesis;GO:0007494//midgut development;GO:0015677//copper ion import;GO:0016348//imaginal disc-derived leg joint morphogenesis;GO:00486…	Homeobox
FBgn0032010	110	99	108	412	338	198	2.043	2.015	2.024	5.69	5.054	2.606	2.02733	4.45	1.13422	6.3063e-09	8.38204e-08	CG8086	NP_001260237.1 uncharacterized protein Dmel_CG8086, isoform I [Drosophila melanogaster]	-	-	-	-	GO:0005856//cytoskeleton	-	GO:0007605//sensory perception of sound	--
FBgn0052656	159	154	274	1746	1185	717	1.877	1.828	3.514	18.879	12.927	8.628	2.40633	13.478	2.4857	6.35313e-09	8.43569e-08	Muc11A	Mucin 11A	-	-	-	-	GO:0005576//extracellular region;GO:0031012//extracellular matrix	GO:0005201//extracellular matrix structural constituent;GO:0008061//chitin binding	-	--
FBgn0032698	854	678	783	362	410	441	40.344	32.177	40.159	15.622	17.894	21.233	37.56	18.2497	-1.04133	6.48493e-09	8.59319e-08	CG10336	NP_609895.2 uncharacterized protein Dmel_CG10336, isoform C [Drosophila melanogaster]	-	-	-	-	GO:0005634//nucleus;GO:0005737//cytoplasm;GO:0031298//replication fork protection complex	GO:0003677//DNA binding	GO:0000076//DNA replication checkpoint signaling;GO:0006974//cellular response to DNA damage stimulus;GO:0008284//positive regulation of cell population proliferation;GO:0031573//mitotic intra-S DNA damage checkpoint signaling;GO:0043111//replication fork arrest;GO:0044770//cell cycle phase transition;GO:0048478//replication fork protection;GO:0051301//cell division	--
FBgn0028997	422	356	359	130	163	194	17.415	14.766	16.091	4.913	6.214	8.159	16.0907	6.42867	-1.32363	6.52536e-09	8.63799e-08	nmdyn-D7	nmdyn-D7	Metabolism;Metabolism;Metabolism;Metabolism	Global and overview maps;Xenobiotics biodegradation and metabolism;Nucleotide metabolism;Nucleotide metabolism	ko01100//Metabolic pathways;ko00983//Drug metabolism - other enzymes;ko00230//Purine metabolism;ko00240//Pyrimidine metabolism	K00940;K00940;K00940;K00940	GO:0005739//mitochondrion;GO:0005813//centrosome	GO:0004550//nucleoside diphosphate kinase activity;GO:0005524//ATP binding	GO:0006165//nucleoside diphosphate phosphorylation;GO:0006183//GTP biosynthetic process;GO:0006228//UTP biosynthetic process;GO:0006241//CTP biosynthetic process;GO:0009142//nucleoside triphosphate biosynthetic process	--
FBgn0037363	207	161	198	436	441	360	1.893	1.48	1.967	3.649	3.724	3.355	1.78	3.576	1.00647	7.71756e-09	1.01339e-07	Atg17	Autophagy-related 17	Cellular Processes	Transport and catabolism	ko04140//Autophagy - animal	K17589	GO:0000407//phagophore assembly site;GO:0019898//extrinsic component of membrane;GO:0034045//phagophore assembly site membrane;GO:1990316//Atg1/ULK1 kinase complex	GO:0019887//protein kinase regulator activity;GO:0019901//protein kinase binding;GO:0060090//molecular adaptor activity	GO:0000045//autophagosome assembly;GO:0000422//autophagy of mitochondrion;GO:0001934//positive regulation of protein phosphorylation;GO:0006914//autophagy;GO:0009267//cellular response to starvation;GO:0016236//macroautophagy;GO:0030242//autophagy of peroxisome;GO:0032147//activation of protein kinase activity;GO:0034727//piecemeal microautophagy of the nucleus;GO:0035071//salivary gland cell aut…	--
FBgn0030014	50	19	23	118	181	135	2.009	0.767	1.004	4.341	6.717	5.527	1.26	5.52833	2.13342	7.80977e-09	1.02438e-07	CG15337	NP_572455.1 uncharacterized protein Dmel_CG15337 [Drosophila melanogaster]	-	-	-	-	-	-	-	--
FBgn0026085	526	426	344	177	198	193	40.117	32.392	28.682	12.059	13.15	14.265	33.7303	13.158	-1.35811	8.29301e-09	1.08458e-07	dgt4	dim gamma-tubulin 4	-	-	-	-	GO:0005737//cytoplasm;GO:0005819//spindle;GO:0005874//microtubule	-	GO:0007052//mitotic spindle organization;GO:0007088//regulation of mitotic nuclear division;GO:0051301//cell division	--
FBgn0000635	76	55	67	206	198	169	1.263	0.917	1.321	3.233	3.297	3.16	1.167	3.23	1.46873	8.38607e-09	1.09346e-07	Fas2	Fasciclin 2	Human Diseases;Environmental Information Processing	Neurodegenerative disease;Signaling molecules and interaction	ko05020//Prion disease;ko04514//Cell adhesion molecules	K06491;K06491	GO:0005737//cytoplasm;GO:0005829//cytosol;GO:0005886//plasma membrane;GO:0016020//membrane;GO:0016021//integral component of membrane;GO:0016324//apical plasma membrane;GO:0030424//axon;GO:0030426//growth cone;GO:0031225//anchored component of membrane;GO:0031256//leading edge membrane;GO:0031594//neuromuscular junction;GO:0036062//presynaptic periactive zone;GO:0042734//presynaptic membrane;GO:0…	GO:0005515//protein binding;GO:0098632//cell-cell adhesion mediator activity	GO:0001746//Bolwig's organ morphogenesis;GO:0007155//cell adhesion;GO:0007156//homophilic cell adhesion via plasma membrane adhesion molecules;GO:0007411//axon guidance;GO:0007413//axonal fasciculation;GO:0007528//neuromuscular junction development;GO:0007611//learning or memory;GO:0007614//short-term memory;GO:0008038//neuron recognition;GO:0008045//motor neuron axon guidance;GO:0008355//olfacto…	--
FBgn0260986	972	925	737	336	481	465	39.127	36.926	31.886	12.228	17.741	18.772	35.9797	16.247	-1.14701	8.41815e-09	1.09655e-07	mei-38	meiotic 38	-	-	-	-	GO:0005737//cytoplasm;GO:0005819//spindle;GO:0005827//polar microtubule;GO:0005828//kinetochore microtubule;GO:0005856//cytoskeleton	GO:0008017//microtubule binding	GO:0000212//meiotic spindle organization;GO:0001578//microtubule bundle formation;GO:0007052//mitotic spindle organization;GO:0007131//reciprocal meiotic recombination;GO:0007143//female meiotic nuclear division;GO:0016321//female meiosis chromosome segregation;GO:0032837//distributive segregation;GO:0045143//homologous chromosome segregation	--
FBgn0051354	809	708	385	6186	3342	2808	19.8	17.429	10.247	138.654	75.559	70.052	15.8253	94.755	2.58197	8.44117e-09	1.09845e-07	Hsp70Bbb	Hsp70Bbb	Genetic Information Processing;Cellular Processes;Genetic Information Processing;Organismal Systems	Folding, sorting and degradation;Transport and catabolism;Transcription;Aging	ko04141//Protein processing in endoplasmic reticulum;ko04144//Endocytosis;ko03040//Spliceosome;ko04213//Longevity regulating pathway - multiple species	K03283;K03283;K03283;K03283	GO:0005634//nucleus;GO:0005737//cytoplasm;GO:0005829//cytosol;GO:0005886//plasma membrane	GO:0005524//ATP binding;GO:0016887//ATP hydrolysis activity;GO:0031072//heat shock protein binding;GO:0044183//protein folding chaperone;GO:0051082//unfolded protein binding;GO:0051787//misfolded protein binding;GO:0140662//ATP-dependent protein folding chaperone	GO:0001666//response to hypoxia;GO:0006986//response to unfolded protein;GO:0009408//response to heat;GO:0016192//vesicle-mediated transport;GO:0034620//cellular response to unfolded protein;GO:0035080//heat shock-mediated polytene chromosome puffing;GO:0042026//protein refolding;GO:0051085//chaperone cofactor-dependent protein refolding	--
FBgn0259736	141	123	228	550	502	331	1.533	1.338	2.677	5.506	5.023	3.661	1.84933	4.73	1.35483	8.97287e-09	1.16299e-07	CG42390	NP_001369028.1 uncharacterized protein Dmel_CG42390, isoform F [Drosophila melanogaster]	-	-	-	-	GO:0005634//nucleus;GO:0005643//nuclear pore;GO:0005737//cytoplasm	-	GO:0043547//positive regulation of GTPase activity	--
FBgn0052170	84	82	109	246	282	206	2.338	2.294	3.295	6.27	7.251	5.843	2.64233	6.45467	1.28853	1.0353e-08	1.3313e-07	CG32170	NP_730211.1 uncharacterized protein Dmel_CG32170 [Drosophila melanogaster]	-	-	-	-	-	-	-	--
FBgn0051104	217	196	309	597	522	494	9.02	8.189	13.95	22.724	20.045	20.927	10.3863	21.232	1.03155	1.05199e-08	1.35141e-07	CG31104	NP_733090.1 uncharacterized protein Dmel_CG31104 [Drosophila melanogaster]	-	-	-	-	-	-	-	--
FBgn0036519	250	218	231	59	109	68	8.554	7.482	8.568	1.839	3.455	2.371	8.20133	2.555	-1.68254	1.06154e-08	1.36157e-07	CG7650	NP_648786.1 uncharacterized protein Dmel_CG7650 [Drosophila melanogaster]	-	-	-	-	-	-	GO:0008277//regulation of G protein-coupled receptor signaling pathway	--
FBgn0051323	137	103	92	324	304	237	2.256	1.711	1.83	5.146	4.674	4.058	1.93233	4.626	1.25942	1.10994e-08	1.41748e-07	CG31323	NP_001247310.1 uncharacterized protein Dmel_CG31323, isoform B [Drosophila melanogaster]	-	-	-	-	-	-	-	--
FBgn0038530	5	10	7	63	54	66	0.387	0.778	0.589	4.466	3.862	5.208	0.584667	4.512	2.94808	1.18761e-08	1.51371e-07	AttD	Attacin-D	-	-	-	-	GO:0005576//extracellular region;GO:0005615//extracellular space	-	GO:0009611//response to wounding;GO:0019731//antibacterial humoral response;GO:0042742//defense response to bacterium;GO:0045087//innate immune response;GO:0050830//defense response to Gram-positive bacterium	--
FBgn0263763	155	94	107	313	318	279	25.152	15.332	18.859	46.511	47.674	46.142	19.781	46.7757	1.24164	1.1913e-08	1.51693e-07	CG43680	NP_001261857.1 uncharacterized protein Dmel_CG43680 [Drosophila melanogaster]	-	-	-	-	-	-	-	--
FBgn0266441	411	375	352	122	197	164	12.645	11.597	11.762	3.437	5.613	5.143	12.0013	4.731	-1.34298	1.21567e-08	1.54343e-07	CG45071	NP_730024.1 uncharacterized protein Dmel_CG45071, isoform A [Drosophila melanogaster]	Metabolism;Metabolism	Global and overview maps;Nucleotide metabolism	ko01100//Metabolic pathways;ko00240//Pyrimidine metabolism	K01937;K01937	GO:0005634//nucleus;GO:0005667//transcription regulator complex	GO:0003677//DNA binding	GO:0000122//negative regulation of transcription by RNA polymerase II;GO:0006357//regulation of transcription by RNA polymerase II	--
FBgn0284229	45	45	42	150	162	121	1.382	1.365	1.393	4.183	4.567	3.748	1.38	4.166	1.59399	1.3212e-08	1.67253e-07	CG46313	-	-	-	-	-	-	-	-	--
FBgn0034647	190	185	177	554	482	310	8.389	8.176	8.489	22.4	19.629	13.914	8.35133	18.6477	1.15892	1.40598e-08	1.76976e-07	pirk	poor Imd response upon knock-in	Organismal Systems	Immune system	ko04624//Toll and Imd signaling pathway	K20701	GO:0005829//cytosol	GO:0005102//signaling receptor binding	GO:0061060//negative regulation of peptidoglycan recognition protein signaling pathway	--
FBgn0034854	278	240	312	775	649	459	3.141	2.726	3.829	8.019	6.775	5.286	3.232	6.69333	1.0503	1.50074e-08	1.88156e-07	Golgin245	Golgin-245	-	-	-	-	GO:0000138//Golgi trans cisterna;GO:0005794//Golgi apparatus	-	GO:0048193//Golgi vesicle transport	--
FBgn0031091	676	616	484	267	285	319	17.488	16.028	13.606	6.293	6.815	8.419	15.7073	7.17567	-1.13025	1.626e-08	2.02884e-07	Phf7	PHD finger protein 7	-	-	-	-	GO:0001673//male germ cell nucleus;GO:0005634//nucleus;GO:0005700//polytene chromosome	GO:0042393//histone binding;GO:0046872//metal ion binding	GO:0010628//positive regulation of gene expression;GO:0019100//male germ-line sex determination;GO:0048136//male germ-line cyst formation	--
FBgn0033569	627	486	574	286	309	241	14.518	11.31	14.435	6.064	6.61	5.687	13.421	6.12033	-1.13281	1.83561e-08	2.26438e-07	CG12942	NP_610628.2 uncharacterized protein Dmel_CG12942 [Drosophila melanogaster]	-	-	-	-	GO:0005634//nucleus	GO:0000976//transcription cis-regulatory region binding;GO:0000981//DNA-binding transcription factor activity, RNA polymerase II-specific;GO:0008270//zinc ion binding	GO:0006355//regulation of transcription, DNA-templated	zf-C2H2
FBgn0010228	149	166	286	565	468	480	10.748	12.39	21.827	36.871	30.766	35.097	14.9883	34.2447	1.19204	1.92883e-08	2.37489e-07	HmgZ	HMG protein Z	-	-	-	-	GO:0005634//nucleus;GO:0005737//cytoplasm	GO:0003677//DNA binding;GO:0003682//chromatin binding;GO:0008134//transcription factor binding;GO:0008301//DNA binding, bending	GO:0006310//DNA recombination;GO:0006338//chromatin remodeling;GO:0006355//regulation of transcription, DNA-templated;GO:0006357//regulation of transcription by RNA polymerase II;GO:0045089//positive regulation of innate immune response;GO:0045944//positive regulation of transcription by RNA polymerase II	HMG
FBgn0085736	53	88	71	187	249	190	6.62	11.008	9.619	21.405	28.776	24.187	9.08233	24.7893	1.44858	1.94392e-08	2.38895e-07	CG40472	NP_001015476.1 NADH dehydrogenase (ubiquinone) AGGG subunit, isoform A [Drosophila melanogaster]	Metabolism;Metabolism	Global and overview maps;Energy metabolism	ko01100//Metabolic pathways;ko00190//Oxidative phosphorylation	K03958;K03958	GO:0005743//mitochondrial inner membrane;GO:0005747//mitochondrial respiratory chain complex I	-	-	--
FBgn0266411	115	85	118	381	326	202	1.216	0.913	1.329	3.683	3.149	2.129	1.15267	2.987	1.37372	2.07665e-08	2.54249e-07	sima	similar	Cellular Processes;Cellular Processes	Transport and catabolism;Transport and catabolism	ko04140//Autophagy - animal;ko04137//Mitophagy - animal	K08268;K08268	GO:0005634//nucleus;GO:0005829//cytosol;GO:0090575//RNA polymerase II transcription regulator complex	GO:0000981//DNA-binding transcription factor activity, RNA polymerase II-specific;GO:0001228//DNA-binding transcription activator activity, RNA polymerase II-specific;GO:0003677//DNA binding;GO:0005515//protein binding;GO:0046983//protein dimerization activity	GO:0006355//regulation of transcription, DNA-templated;GO:0006357//regulation of transcription by RNA polymerase II;GO:0008286//insulin receptor signaling pathway;GO:0010508//positive regulation of autophagy;GO:0030308//negative regulation of cell growth;GO:0030334//regulation of cell migration;GO:0032869//cellular response to insulin stimulus;GO:0045088//regulation of innate immune response;GO:0…	--
FBgn0030970	352	299	319	96	161	137	9.113	7.787	8.978	2.278	3.852	3.618	8.626	3.24933	-1.40855	2.12817e-08	2.60312e-07	CG7326	NP_001259695.1 uncharacterized protein Dmel_CG7326, isoform B [Drosophila melanogaster]	-	-	-	-	-	GO:0061630//ubiquitin protein ligase activity	-	--
FBgn0263346	483	441	439	1281	1025	682	5.409	5.209	5.378	13.58	10.788	7.807	5.332	10.725	1.00823	2.15791e-08	2.63702e-07	smash	smallish	Cellular Processes	Cellular community - eukaryotes	ko04520//Adherens junction	K06084	-	GO:0046872//metal ion binding	-	--
FBgn0003480	445	404	323	162	200	167	18.47	16.854	14.561	6.157	7.669	7.064	16.6283	6.96333	-1.25579	2.26126e-08	2.75557e-07	spn-B	spindle B	Genetic Information Processing	Replication and repair	ko03440//Homologous recombination	K10880	GO:0005657//replication fork;GO:0033065//Rad51C-XRCC3 complex	GO:0000150//DNA strand exchange activity;GO:0003677//DNA binding;GO:0005524//ATP binding;GO:0008094//ATP-dependent activity, acting on DNA;GO:0140664//ATP-dependent DNA damage sensor activity	GO:0000722//telomere maintenance via recombination;GO:0006281//DNA repair;GO:0006302//double-strand break repair;GO:0006310//DNA recombination;GO:0006417//regulation of translation;GO:0007131//reciprocal meiotic recombination;GO:0007294//germarium-derived oocyte fate determination;GO:0008298//intracellular mRNA localization;GO:0009949//polarity specification of anterior/posterior axis;GO:0009951/…	--
FBgn0050394	140	127	160	382	344	271	2.633	2.4	3.268	6.578	6.003	5.201	2.767	5.92733	1.09906	2.27109e-08	2.76496e-07	CG30394	NP_611578.1 uncharacterized protein Dmel_CG30394, isoform B [Drosophila melanogaster]	-	-	-	-	GO:0016021//integral component of membrane	GO:0015171//amino acid transmembrane transporter activity	GO:0003333//amino acid transmembrane transport	--
FBgn0043001	875	762	673	376	453	401	72.526	63.725	60.992	28.526	33.767	33.957	65.7477	32.0833	-1.03512	2.41979e-08	2.9405e-07	Chrac-16	Chromatin accessibility complex 16kD protein	-	-	-	-	GO:0008623//CHRAC	GO:0046982//protein heterodimerization activity	GO:0042766//nucleosome mobilization	--
FBgn0033549	362	300	239	113	122	134	18.273	15.221	13.104	5.223	5.689	6.894	15.5327	5.93533	-1.3879	2.52056e-08	3.05727e-07	mms4	Methyl methanesulfonate sensitivity 4	Genetic Information Processing;Genetic Information Processing	Replication and repair;Replication and repair	ko03460//Fanconi anemia pathway;ko03440//Homologous recombination	K10882;K10882	GO:0005634//nucleus;GO:0048476//Holliday junction resolvase complex	GO:0003677//DNA binding;GO:0004518//nuclease activity	GO:0000712//resolution of meiotic recombination intermediates;GO:0006281//DNA repair;GO:0006302//double-strand break repair;GO:0031297//replication fork processing;GO:0031573//mitotic intra-S DNA damage checkpoint signaling	--
FBgn0034602	119	161	174	390	347	311	4.194	5.703	6.66	12.586	11.298	11.17	5.519	11.6847	1.08214	2.61209e-08	3.1624e-07	Lapsyn	Leucine-rich repeat activity-regulated protein at synapses	-	-	-	-	GO:0016021//integral component of membrane;GO:0043025//neuronal cell body	GO:0005515//protein binding	GO:0007399//nervous system development	--
FBgn0053258	186	182	325	844	510	507	12.382	12.246	22.946	50.692	30.59	34.025	15.858	38.4357	1.27723	2.62609e-08	3.1764e-07	CG33258	NP_001034027.2 uncharacterized protein Dmel_CG33258, isoform B [Drosophila melanogaster]	-	-	-	-	GO:0005576//extracellular region	GO:0008061//chitin binding	-	--
FBgn0013995	1984	1667	1375	900	996	903	26.876	22.742	20.293	10.333	12.306	12.214	23.3037	11.6177	-1.00424	2.79636e-08	3.36984e-07	Calx	Na/Ca-exchange protein	Organismal Systems;Environmental Information Processing;Organismal Systems;Environmental Information Processing;Organismal Systems;Human Diseases;Organismal Systems;Human Diseases;Environmental Information Processing;Organismal Systems;Organismal Systems;Human Diseases	Digestive system;Signal transduction;Circulatory system;Signal transduction;Digestive system;Cardiovascular disease;Circulatory system;Cardiovascular disease;Signal transduction;Sensory system;Excretory system;Cardiovascular disease	ko04974//Protein digestion and absorption;ko04022//cGMP-PKG signaling pathway;ko04261//Adrenergic signaling in cardiomyocytes;ko04020//Calcium signaling pathway;ko04978//Mineral absorption;ko05410//Hypertrophic cardiomyopathy;ko04260//Cardiac muscle contraction;ko05414//Dilated cardiomyopathy;ko04371//Apelin signaling pathway;ko04740//Olfactory transduction;ko04961//Endocrine and other factor-reg…	K05849;K05849;K05849;K05849;K05849;K05849;K05849;K05849;K05849;K05849;K05849;K05849	GO:0005886//plasma membrane;GO:0016020//membrane;GO:0016021//integral component of membrane	GO:0005432//calcium:sodium antiporter activity;GO:0005509//calcium ion binding;GO:0005516//calmodulin binding	GO:0006816//calcium ion transport;GO:0007154//cell communication;GO:0007602//phototransduction;GO:0034976//response to endoplasmic reticulum stress;GO:0050884//neuromuscular process controlling posture;GO:0055085//transmembrane transport	--
FBgn0036389	2947	2307	1860	1117	1355	1298	48.712	38.336	33.136	16.173	20.381	21.634	40.0613	19.396	-1.04645	2.97034e-08	3.56961e-07	ssp2	short spindle 2	-	-	-	-	GO:0005813//centrosome;GO:0090619//meiotic spindle pole	-	GO:0000226//microtubule cytoskeleton organization;GO:0051455//monopolar spindle attachment to meiosis I kinetochore	--
FBgn0265575	5176	4120	3353	1887	2564	2273	108.149	86.531	76.127	36.376	49.771	48.569	90.269	44.9053	-1.00734	2.98262e-08	3.58106e-07	yin	yin	Organismal Systems	Digestive system	ko04974//Protein digestion and absorption	K14206	GO:0005887//integral component of plasma membrane;GO:0016020//membrane;GO:0016021//integral component of membrane;GO:0030670//phagocytic vesicle membrane	GO:0005427//proton-dependent oligopeptide secondary active transmembrane transporter activity;GO:0022857//transmembrane transporter activity;GO:0035673//oligopeptide transmembrane transporter activity;GO:0071916//dipeptide transmembrane transporter activity	GO:0006857//oligopeptide transport;GO:0015031//protein transport;GO:0035442//dipeptide transmembrane transport;GO:0055085//transmembrane transport	--
FBgn0034145	47	47	75	174	182	162	0.89	0.85	1.512	2.824	3.029	2.929	1.084	2.92733	1.43322	3.01929e-08	3.62176e-07	CG5065	NP_001163168.1 uncharacterized protein Dmel_CG5065, isoform B [Drosophila melanogaster]	Cellular Processes	Transport and catabolism	ko04146//Peroxisome	K13356	GO:0005777//peroxisome;GO:0005778//peroxisomal membrane;GO:0005779//integral component of peroxisomal membrane;GO:0043231//intracellular membrane-bounded organelle	GO:0080019//fatty-acyl-CoA reductase (alcohol-forming) activity;GO:0102965//alcohol-forming fatty acyl-CoA reductase activity	GO:0006629//lipid metabolic process;GO:0008611//ether lipid biosynthetic process;GO:0010025//wax biosynthetic process;GO:0035336//long-chain fatty-acyl-CoA metabolic process	--
FBgn0002673	518	520	564	212	317	250	15.802	16.01	19.171	6.009	8.973	7.64	16.9943	7.54067	-1.17229	3.04445e-08	3.64858e-07	twe	twine	-	-	-	-	GO:0005634//nucleus;GO:0005737//cytoplasm;GO:0005819//spindle	GO:0004725//protein tyrosine phosphatase activity	GO:0000086//G2/M transition of mitotic cell cycle;GO:0006470//protein dephosphorylation;GO:0007049//cell cycle;GO:0007140//male meiotic nuclear division;GO:0007283//spermatogenesis;GO:0007348//regulation of syncytial blastoderm mitotic cell cycle;GO:0008315//G2/MI transition of meiotic cell cycle;GO:0009880//embryonic pattern specification;GO:0010971//positive regulation of G2/M transition of mit…	--
FBgn0040602	641	725	899	401	417	349	45.292	51.489	68.993	25.946	27.221	25.132	55.258	26.0997	-1.08215	3.17074e-08	3.79645e-07	CG14545	NP_652254.3 uncharacterized protein Dmel_CG14545 [Drosophila melanogaster]	-	-	-	-	-	-	-	--
FBgn0032685	72	78	70	237	189	171	0.806	0.868	0.842	2.404	1.934	1.947	0.838667	2.095	1.32078	3.19308e-08	3.81618e-07	CG10211	NP_001286043.1 uncharacterized protein Dmel_CG10211, isoform B [Drosophila melanogaster]	-	-	-	-	-	GO:0004601//peroxidase activity;GO:0020037//heme binding	GO:0006979//response to oxidative stress	--
FBgn0262539	40	41	77	177	181	166	4.827	4.973	10.093	19.56	20.18	20.417	6.631	20.0523	1.59647	3.23915e-08	3.8677e-07	CG43093	ACO52095.1 MIP06286p, partial [Drosophila melanogaster]	-	-	-	-	-	-	-	--
FBgn0028374	99	110	116	246	282	236	5.505	6.148	7.006	12.527	14.488	13.375	6.21967	13.4633	1.11413	3.29223e-08	3.92748e-07	Hug	Hugin	-	-	-	-	GO:0005576//extracellular region;GO:0005615//extracellular space	GO:0005102//signaling receptor binding;GO:0005179//hormone activity;GO:0008255//ecdysis-triggering hormone activity;GO:0016084//myostimulatory hormone activity;GO:0071855//neuropeptide receptor binding	GO:0007218//neuropeptide signaling pathway;GO:0018990//ecdysis, chitin-based cuticle;GO:0030536//larval feeding behavior	--
FBgn0030008	506	516	410	211	253	246	14.411	14.771	12.683	5.503	6.657	7.14	13.955	6.43333	-1.11714	3.36019e-08	4.00123e-07	CG2129	NP_572449.1 uncharacterized protein Dmel_CG2129 [Drosophila melanogaster]	-	-	-	-	GO:0000792//heterochromatin;GO:0005634//nucleus	GO:0000978//RNA polymerase II cis-regulatory region sequence-specific DNA binding;GO:0001228//DNA-binding transcription activator activity, RNA polymerase II-specific	GO:0006357//regulation of transcription by RNA polymerase II	zf-C2H2
FBgn0053307	347	452	705	1233	1169	1004	34.016	44.535	75.064	110.477	105.87	100.308	51.205	105.552	1.04359	3.52457e-08	4.1741e-07	CG33307	NP_001285911.1 uncharacterized protein Dmel_CG33307, isoform B [Drosophila melanogaster]	-	-	-	-	-	-	-	--
FBgn0039938	84	81	94	244	265	177	1.69	1.594	2.021	4.38	4.75	3.555	1.76833	4.22833	1.2577	3.56017e-08	4.21244e-07	Sox102F	Sox102F	-	-	-	-	GO:0005634//nucleus	GO:0000976//transcription cis-regulatory region binding	GO:0045165//cell fate commitment;GO:0045823//positive regulation of heart contraction;GO:0045892//negative regulation of transcription, DNA-templated;GO:0045944//positive regulation of transcription by RNA polymerase II	HMG
FBgn0000527	285	281	171	490	661	535	5.211	5.164	3.396	8.204	11.165	9.969	4.59033	9.77933	1.09114	4.08124e-08	4.7985e-07	e	ebony	-	-	-	-	GO:0005737//cytoplasm	GO:0000036//acyl carrier activity;GO:0003833//beta-alanyl-dopamine synthase activity;GO:0004467//long-chain fatty acid-CoA ligase activity;GO:0015645//fatty acid ligase activity;GO:0016405//CoA-ligase activity;GO:0031177//phosphopantetheine binding;GO:0102391//decanoate-CoA ligase activity	GO:0001692//histamine metabolic process;GO:0006583//melanin biosynthetic process from tyrosine;GO:0006633//fatty acid biosynthetic process;GO:0007593//chitin-based cuticle sclerotization;GO:0007623//circadian rhythm;GO:0042417//dopamine metabolic process;GO:0042440//pigment metabolic process;GO:0043042//amino acid adenylylation by nonribosomal peptide synthase;GO:0045475//locomotor rhythm;GO:0048…	--
FBgn0015513	243	237	265	658	640	386	1.887	1.846	2.228	4.673	4.582	3.052	1.987	4.10233	1.04585	4.23398e-08	4.96464e-07	mbc	myoblast city	Cellular Processes;Human Diseases;Cellular Processes;Human Diseases;Human Diseases;Organismal Systems	Cell motility;Infectious disease: bacterial;Cellular community - eukaryotes;Infectious disease: bacterial;Infectious disease: bacterial;Immune system	ko04810//Regulation of actin cytoskeleton;ko05131//Shigellosis;ko04510//Focal adhesion;ko05100//Bacterial invasion of epithelial cells;ko05135//Yersinia infection;ko04666//Fc gamma R-mediated phagocytosis	K13708;K13708;K13708;K13708;K13708;K13708	GO:0001726//ruffle;GO:0005737//cytoplasm;GO:0019897//extrinsic component of plasma membrane	GO:0005085//guanyl-nucleotide exchange factor activity;GO:0005515//protein binding	GO:0000902//cell morphogenesis;GO:0007010//cytoskeleton organization;GO:0007264//small GTPase mediated signal transduction;GO:0007298//border follicle cell migration;GO:0007391//dorsal closure;GO:0007417//central nervous system development;GO:0007520//myoblast fusion;GO:0007523//larval visceral muscle development;GO:0016203//muscle attachment;GO:0030036//actin cytoskeleton organization;GO:0035022…	--
FBgn0039319	83	116	131	352	293	225	3.665	5.148	6.283	14.232	11.952	10.125	5.032	12.103	1.26616	4.84481e-08	5.64535e-07	CG13659	NP_651378.1 uncharacterized protein Dmel_CG13659 [Drosophila melanogaster]	-	-	-	-	-	-	-	--
FBgn0024993	583	482	504	275	294	252	20.041	16.69	18.711	8.658	9.32	8.759	18.4807	8.91233	-1.05214	4.90168e-08	5.70652e-07	CG2662	NP_001284832.1 uncharacterized protein Dmel_CG2662, isoform B [Drosophila melanogaster]	-	-	-	-	GO:0005634//nucleus	GO:0003682//chromatin binding;GO:0005515//protein binding;GO:0042393//histone binding;GO:0046872//metal ion binding	GO:0045892//negative regulation of transcription, DNA-templated	--
FBgn0086906	329	295	419	893	816	555	0.577	0.506	0.887	1.563	1.497	1.109	0.656667	1.38967	1.08151	4.92859e-08	5.73273e-07	sls	sallimus	Human Diseases;Human Diseases	Cardiovascular disease;Cardiovascular disease	ko05410//Hypertrophic cardiomyopathy;ko05414//Dilated cardiomyopathy	K12567;K12567	-	GO:0005515//protein binding	-	--
FBgn0051436	121	109	165	302	319	297	4.958	4.489	7.343	11.331	12.075	12.402	5.59667	11.936	1.09268	5.19281e-08	6.00257e-07	CG31436	NP_733096.1 uncharacterized protein Dmel_CG31436 [Drosophila melanogaster]	-	-	-	-	-	-	-	--
FBgn0032218	81	64	110	346	255	179	2.102	1.648	3.092	8.099	6.059	4.693	2.28067	6.28367	1.46215	5.36333e-08	6.17648e-07	CG5381	NP_001260322.1 uncharacterized protein Dmel_CG5381, isoform B [Drosophila melanogaster]	-	-	-	-	-	-	-	--
FBgn0003450	243	260	210	89	106	102	9.821	10.518	9.171	3.269	3.975	4.173	9.83667	3.80567	-1.37002	5.37704e-08	6.18265e-07	snk	snake	-	-	-	-	GO:0005576//extracellular region	GO:0004252//serine-type endopeptidase activity	GO:0006508//proteolysis;GO:0008063//Toll signaling pathway;GO:0009950//dorsal/ventral axis specification;GO:0031638//zymogen activation;GO:0045752//positive regulation of Toll signaling pathway	--
MSTRG.2253	11	17	10	76	72	66	0.89	1.367	0.899	5.665	5.417	5.465	1.052	5.51567	2.3904	6.00479e-08	6.86209e-07	--	IP07237p, partial [Drosophila melanogaster]	-	-	-	-	-	-	-	--
FBgn0039467	57	54	51	186	178	124	1.685	1.631	1.647	5.124	4.98	3.852	1.65433	4.652	1.4916	6.436e-08	7.32648e-07	CG14253	NP_651517.1 uncharacterized protein Dmel_CG14253, isoform B [Drosophila melanogaster]	-	-	-	-	GO:0016021//integral component of membrane	-	-	--
FBgn0030028	349	263	303	146	141	118	18.297	13.894	17.315	6.896	6.903	6.373	16.502	6.724	-1.29525	6.43925e-08	7.32648e-07	Corp	Companion of reaper	-	-	-	-	-	GO:0002039//p53 binding	GO:1902166//negative regulation of intrinsic apoptotic signaling pathway in response to DNA damage by p53 class mediator;GO:1902230//negative regulation of intrinsic apoptotic signaling pathway in response to DNA damage	--
FBgn0054054	46	41	54	200	159	111	4.849	4.344	6.182	19.304	15.483	11.924	5.125	15.5703	1.60318	7.14178e-08	8.09754e-07	CG34054	ACD99509.1 IP20547p, partial [Drosophila melanogaster]	-	-	-	-	-	-	-	--
FBgn0266430	12	10	21	112	77	59	1.376	1.152	2.615	11.76	8.157	6.895	1.71433	8.93733	2.3822	8.27746e-08	9.28496e-07	CG45060	EDX16526.1 GD24557 [Drosophila simulans]	-	-	-	-	-	-	-	--
FBgn0037664	434	392	308	120	193	169	12.992	11.712	9.977	3.222	5.267	5.051	11.5603	4.51333	-1.35692	8.27981e-08	9.28496e-07	CG8420	NP_649869.1 uncharacterized protein Dmel_CG8420, isoform A [Drosophila melanogaster]	-	-	-	-	GO:0005615//extracellular space	-	GO:0032504//multicellular organism reproduction	--
FBgn0261552	59	58	87	320	234	135	0.91	0.773	1.165	3.377	2.957	1.921	0.949333	2.75167	1.53532	8.28874e-08	9.28496e-07	ps	pasilla	-	-	-	-	GO:0005634//nucleus;GO:0005737//cytoplasm;GO:0005829//cytosol	GO:0003676//nucleic acid binding;GO:0003723//RNA binding;GO:0003729//mRNA binding;GO:0097157//pre-mRNA intronic binding	GO:0000381//regulation of alternative mRNA splicing, via spliceosome;GO:0000398//mRNA splicing, via spliceosome;GO:0010468//regulation of gene expression;GO:0033120//positive regulation of RNA splicing;GO:0051252//regulation of RNA metabolic process	--
FBgn0036877	136	101	83	307	262	236	4.729	3.53	3.135	9.776	8.417	8.364	3.798	8.85233	1.22082	9.217e-08	1.02107e-06	CG9452	NP_649119.2 uncharacterized protein Dmel_CG9452 [Drosophila melanogaster]	-	-	-	-	GO:0005634//nucleus;GO:0070062//extracellular exosome	GO:0003993//acid phosphatase activity	GO:0016311//dephosphorylation	--
MSTRG.9673	23	11	20	90	87	79	0.856	0.412	0.809	3.068	2.992	2.997	0.692333	3.019	2.12453	9.4707e-08	1.04829e-06	--	-	-	-	-	-	-	-	-	--
FBgn0087007	183	132	166	526	468	260	2.44	1.742	2.285	6.086	5.376	3.379	2.15567	4.947	1.19842	9.7847e-08	1.07792e-06	bbg	big bang	-	-	-	-	GO:0005634//nucleus;GO:0005918//septate junction;GO:0045177//apical part of cell	GO:0005515//protein binding	GO:0007298//border follicle cell migration;GO:0007476//imaginal disc-derived wing morphogenesis	--
FBgn0033159	7	17	14	82	108	49	0.052	0.124	0.11	0.559	0.733	0.359	0.0953333	0.550333	2.52925	1.02933e-07	1.12596e-06	Dscam1	Down syndrome cell adhesion molecule 1	-	-	-	-	GO:0005886//plasma membrane;GO:0005887//integral component of plasma membrane;GO:0030424//axon;GO:0030425//dendrite;GO:0043005//neuron projection;GO:0043025//neuronal cell body	GO:0003823//antigen binding;GO:0005515//protein binding;GO:0008046//axon guidance receptor activity;GO:0042802//identical protein binding;GO:0042803//protein homodimerization activity;GO:0046872//metal ion binding;GO:0098632//cell-cell adhesion mediator activity	GO:0006909//phagocytosis;GO:0007155//cell adhesion;GO:0007156//homophilic cell adhesion via plasma membrane adhesion molecules;GO:0007411//axon guidance;GO:0007413//axonal fasciculation;GO:0007419//ventral cord development;GO:0007422//peripheral nervous system development;GO:0016319//mushroom body development;GO:0021551//central nervous system morphogenesis;GO:0030335//positive regulation of cell…	--
FBgn0039013	881	832	621	434	422	384	33.056	31.377	25.308	14.912	14.628	14.684	29.9137	14.7413	-1.02094	1.04041e-07	1.13617e-06	CG4813	NP_651088.1 uncharacterized protein Dmel_CG4813 [Drosophila melanogaster]	-	-	-	-	GO:0005737//cytoplasm	GO:0004842//ubiquitin-protein transferase activity;GO:0008270//zinc ion binding;GO:0046872//metal ion binding;GO:0061630//ubiquitin protein ligase activity	GO:0016567//protein ubiquitination	--
FBgn0030927	174	194	124	400	361	334	5.501	6.165	4.258	11.58	10.544	10.762	5.308	10.962	1.04627	1.05034e-07	1.1451e-06	CG15046	NP_573298.1 uncharacterized protein Dmel_CG15046 [Drosophila melanogaster]	-	-	-	-	-	-	-	--
FBgn0036896	165	115	148	405	365	258	2.36	1.68	2.245	5.278	4.831	3.772	2.095	4.627	1.14313	1.06161e-07	1.15545e-06	wnd	wallenda	Organismal Systems;Environmental Information Processing	Development and regeneration;Signal transduction	ko04361//Axon regeneration;ko04010//MAPK signaling pathway	K04422;K04422	GO:0005737//cytoplasm;GO:0030424//axon	GO:0004672//protein kinase activity;GO:0004709//MAP kinase kinase kinase activity;GO:0005524//ATP binding	GO:0006468//protein phosphorylation;GO:0007030//Golgi organization;GO:0007165//signal transduction;GO:0007283//spermatogenesis;GO:0007616//long-term memory;GO:0046777//protein autophosphorylation;GO:0048674//collateral sprouting of injured axon;GO:0048682//sprouting of injured axon;GO:0072375//medium-term memory;GO:2000331//regulation of terminal button organization	--
FBgn0027949	709	530	637	293	349	346	29.816	22.402	29.096	11.283	13.559	14.829	27.1047	13.2237	-1.03542	1.07138e-07	1.16317e-06	msb1l	msb1l	-	-	-	-	-	-	-	--
FBgn0004379	831	649	814	393	471	369	16.395	12.855	17.423	7.115	8.622	7.415	15.5577	7.71733	-1.01145	1.10586e-07	1.19961e-06	Klp67A	Kinesin-like protein at 67A	-	-	-	-	GO:0000776//kinetochore;GO:0005634//nucleus;GO:0005737//cytoplasm;GO:0005828//kinetochore microtubule;GO:0005871//kinesin complex;GO:0005874//microtubule;GO:0005875//microtubule associated complex;GO:0005876//spindle microtubule;GO:0061673//mitotic spindle astral microtubule;GO:0072686//mitotic spindle;GO:1990023//mitotic spindle midzone	GO:0003774//cytoskeletal motor activity;GO:0003777//microtubule motor activity;GO:0005524//ATP binding;GO:0008017//microtubule binding;GO:0008574//plus-end-directed microtubule motor activity;GO:0016887//ATP hydrolysis activity	GO:0000070//mitotic sister chromatid segregation;GO:0007018//microtubule-based movement;GO:0007019//microtubule depolymerization;GO:0007052//mitotic spindle organization;GO:0007054//spindle assembly involved in male meiosis I;GO:0007059//chromosome segregation;GO:0007060//male meiosis chromosome segregation;GO:0007100//mitotic centrosome separation;GO:0007110//meiosis I cytokinesis;GO:0007141//ma…	--
FBgn0030163	91	108	181	330	343	305	4.437	5.29	9.578	14.724	15.434	15.146	6.435	15.1013	1.23066	1.12747e-07	1.22102e-06	CG1791	NP_572591.1 uncharacterized protein Dmel_CG1791, isoform A [Drosophila melanogaster]	-	-	-	-	GO:0005615//extracellular space;GO:0062023//collagen-containing extracellular matrix	GO:0030297//transmembrane receptor protein tyrosine kinase activator activity	GO:0043066//negative regulation of apoptotic process	--
FBgn0036563	19	43	27	127	104	118	0.95	2.161	1.466	5.814	4.804	6.013	1.52567	5.54367	1.8614	1.19597e-07	1.29091e-06	CG13075	NP_648831.1 uncharacterized protein Dmel_CG13075 [Drosophila melanogaster]	-	-	-	-	GO:0005576//extracellular region	GO:0008061//chitin binding	-	--
FBgn0011746	22	13	18	87	85	72	0.523	0.311	0.465	1.893	1.866	1.744	0.433	1.83433	2.08282	1.42495e-07	1.51426e-06	ana	anachronism	-	-	-	-	GO:0005576//extracellular region	-	GO:0007399//nervous system development;GO:0030154//cell differentiation	--
FBgn0020493	101	109	122	355	353	186	1.547	1.678	2.029	5.008	5.022	2.912	1.75133	4.314	1.30057	1.43948e-07	1.52531e-06	Dad	Daughters against dpp	Environmental Information Processing	Signal transduction	ko04350//TGF-beta signaling pathway	K04677	GO:0005634//nucleus;GO:0005667//transcription regulator complex;GO:0005737//cytoplasm	GO:0003677//DNA binding;GO:0003700//DNA-binding transcription factor activity;GO:0005515//protein binding;GO:0046872//metal ion binding;GO:0070700//BMP receptor binding	GO:0006355//regulation of transcription, DNA-templated;GO:0007179//transforming growth factor beta receptor signaling pathway;GO:0007443//Malpighian tubule morphogenesis;GO:0007448//anterior/posterior pattern specification, imaginal disc;GO:0007476//imaginal disc-derived wing morphogenesis;GO:0007488//histoblast morphogenesis;GO:0010991//negative regulation of SMAD protein complex assembly;GO:001…	MH1
FBgn0031191	1414	1286	976	563	757	645	33.132	30.326	25.286	11.834	16.073	15.203	29.5813	14.37	-1.04163	1.47066e-07	1.55523e-06	Cp110	Centriolar coiled coil protein 110kDa	-	-	-	-	GO:0005814//centriole	GO:0005515//protein binding	GO:0007099//centriole replication;GO:0032053//ciliary basal body organization;GO:0032465//regulation of cytokinesis;GO:0051298//centrosome duplication;GO:1903723//negative regulation of centriole elongation	--
FBgn0037724	1883	1124	760	6158	4645	5201	91.902	55.138	40.288	275.217	209.442	258.707	62.4427	247.789	1.98851	1.57307e-07	1.66083e-06	Fst	Frost	-	-	-	-	GO:0005615//extracellular space	-	GO:0009409//response to cold;GO:0009631//cold acclimation	--
FBgn0003429	548	591	562	334	294	202	6.465	6.937	7.1	3.505	3.154	2.35	6.834	3.003	-1.18633	1.58594e-07	1.67307e-06	slo	slowpoke	Organismal Systems;Environmental Information Processing;Organismal Systems;Organismal Systems;Organismal Systems;Organismal Systems	Digestive system;Signal transduction;Circulatory system;Digestive system;Endocrine system;Endocrine system	ko04972//Pancreatic secretion;ko04022//cGMP-PKG signaling pathway;ko04270//Vascular smooth muscle contraction;ko04970//Salivary secretion;ko04911//Insulin secretion;ko04924//Renin secretion	K04936;K04936;K04936;K04936;K04936;K04936	GO:0005886//plasma membrane;GO:0016020//membrane;GO:0016021//integral component of membrane;GO:0043005//neuron projection;GO:0043025//neuronal cell body;GO:0045211//postsynaptic membrane	GO:0005216//ion channel activity;GO:0005244//voltage-gated ion channel activity;GO:0015269//calcium-activated potassium channel activity;GO:0060072//large conductance calcium-activated potassium channel activity	GO:0006811//ion transport;GO:0006813//potassium ion transport;GO:0007623//circadian rhythm;GO:0008582//regulation of synaptic assembly at neuromuscular junction;GO:0034765//regulation of ion transmembrane transport;GO:0045433//male courtship behavior, veined wing generated song production;GO:0048512//circadian behavior;GO:0055085//transmembrane transport;GO:1900074//negative regulation of neuromu…	--
MSTRG.3982	17	24	44	123	108	115	1.85	2.624	5.199	12.254	10.855	12.752	3.22433	11.9537	1.89038	1.68692e-07	1.77358e-06	--	RH09485p [Drosophila melanogaster]	-	-	-	-	-	-	-	--
FBgn0035641	788	828	1004	427	562	430	23.687	25.017	32.78	11.754	15.607	13.174	27.1613	13.5117	-1.00735	1.71457e-07	1.7967e-06	CG5568	NP_647992.1 uncharacterized protein Dmel_CG5568 [Drosophila melanogaster]	-	-	-	-	-	GO:0004467//long-chain fatty acid-CoA ligase activity;GO:0015645//fatty acid ligase activity;GO:0016405//CoA-ligase activity	GO:0001676//long-chain fatty acid metabolic process;GO:0006633//fatty acid biosynthetic process;GO:0046949//fatty-acyl-CoA biosynthetic process	--
FBgn0052024	74	54	118	290	245	194	5.721	4.196	9.909	20.532	17.5	15.287	6.60867	17.773	1.42726	1.71554e-07	1.7967e-06	CG32024	NP_729417.2 uncharacterized protein Dmel_CG32024 [Drosophila melanogaster]	-	-	-	-	GO:0005576//extracellular region	GO:0008061//chitin binding	-	--
FBgn0268063	51	36	69	203	190	121	0.735	0.506	1.061	2.599	2.509	1.836	0.767333	2.31467	1.59288	1.80867e-07	1.88666e-06	ltl	larval translucida	-	-	-	-	GO:0005615//extracellular space;GO:0031012//extracellular matrix	GO:0005515//protein binding	GO:0007474//imaginal disc-derived wing vein specification;GO:0007476//imaginal disc-derived wing morphogenesis;GO:0030514//negative regulation of BMP signaling pathway	--
FBgn0028741	113	88	108	297	273	194	0.994	0.806	1.056	2.45	2.227	1.77	0.952	2.149	1.17463	1.81589e-07	1.89117e-06	fab1	fab1 kinase	Metabolism;Cellular Processes;Environmental Information Processing;Metabolism	Global and overview maps;Transport and catabolism;Signal transduction;Carbohydrate metabolism	ko01100//Metabolic pathways;ko04145//Phagosome;ko04070//Phosphatidylinositol signaling system;ko00562//Inositol phosphate metabolism	K00921;K00921;K00921;K00921	GO:0005768//endosome;GO:0010008//endosome membrane;GO:0012506//vesicle membrane	GO:0000285//1-phosphatidylinositol-3-phosphate 5-kinase activity;GO:0005524//ATP binding;GO:0008270//zinc ion binding;GO:0016307//phosphatidylinositol phosphate kinase activity;GO:0016308//1-phosphatidylinositol-4-phosphate 5-kinase activity;GO:0046872//metal ion binding	GO:0008333//endosome to lysosome transport;GO:0035556//intracellular signal transduction;GO:0046488//phosphatidylinositol metabolic process;GO:0046854//phosphatidylinositol phosphate biosynthetic process;GO:0097352//autophagosome maturation	--
FBgn0039449	267	270	233	133	103	80	7.3	7.42	6.919	3.33	2.602	2.229	7.213	2.72033	-1.40682	1.88852e-07	1.9621e-06	CG6425	NP_651497.1 uncharacterized protein Dmel_CG6425 [Drosophila melanogaster]	-	-	-	-	-	-	-	--
FBgn0050115	539	354	300	1014	935	679	5.225	3.433	3.15	9.001	8.358	6.68	3.936	8.013	1.02561	1.93025e-07	2.00068e-06	GEFmeso	Guanine nucleotide exchange factor in mesoderm	-	-	-	-	-	GO:0005085//guanyl-nucleotide exchange factor activity	GO:0007474//imaginal disc-derived wing vein specification;GO:0007480//imaginal disc-derived leg morphogenesis;GO:0032489//regulation of Cdc42 protein signal transduction	--
FBgn0015038	195	236	359	665	599	502	6.394	7.778	12.785	19.966	18.145	16.775	8.98567	18.2953	1.02578	1.95722e-07	2.02541e-06	Cyp9b1	Cytochrome P450-9b1	-	-	-	-	GO:0005789//endoplasmic reticulum membrane	GO:0004497//monooxygenase activity;GO:0005506//iron ion binding;GO:0016705//oxidoreductase activity, acting on paired donors, with incorporation or reduction of molecular oxygen;GO:0020037//heme binding	-	--
FBgn0039759	92	85	53	191	284	184	3.609	3.352	2.257	6.861	10.294	7.356	3.07267	8.17033	1.4109	2.10276e-07	2.16742e-06	CG9733	NP_651784.2 uncharacterized protein Dmel_CG9733, isoform A [Drosophila melanogaster]	-	-	-	-	GO:0005615//extracellular space	GO:0004252//serine-type endopeptidase activity	GO:0006508//proteolysis	--
FBgn0000279	43	34	15	123	132	110	6.399	5.086	2.425	16.762	18.149	16.684	4.63667	17.1983	1.89111	2.30155e-07	2.35372e-06	CecC	Cecropin C	Organismal Systems	Immune system	ko04624//Toll and Imd signaling pathway	K20696	GO:0005576//extracellular region;GO:0005615//extracellular space	-	GO:0006959//humoral immune response;GO:0019731//antibacterial humoral response;GO:0045087//innate immune response;GO:0050829//defense response to Gram-negative bacterium;GO:0050830//defense response to Gram-positive bacterium	--
FBgn0263081	933	492	428	2624	2551	1929	142.27	75.477	70.853	366.402	359.536	299.985	96.2	341.974	1.82978	2.42419e-07	2.47138e-06	CG43349	-	-	-	-	-	-	-	-	--
FBgn0038717	443	279	363	180	142	163	15.275	9.669	13.595	5.683	4.523	5.728	12.8463	5.31133	-1.27421	2.43328e-07	2.47872e-06	CG17751	NP_650816.3 uncharacterized protein Dmel_CG17751 [Drosophila melanogaster]	-	-	-	-	GO:0016021//integral component of membrane	GO:0022857//transmembrane transporter activity	GO:0055085//transmembrane transport	--
FBgn0000092	156	191	157	73	58	38	8.846	10.887	9.67	3.791	3.039	2.196	9.801	3.00867	-1.7038	2.45962e-07	2.50359e-06	dyw	daywake	-	-	-	-	GO:0005615//extracellular space	-	GO:0007623//circadian rhythm;GO:0010841//positive regulation of circadian sleep/wake cycle, wakefulness	--
FBgn0013679	15244	25362	29892	12847	12192	11542	932.578	1559.49	1986.22	719.696	689.07	719.637	1492.76	709.468	-1.07318	2.52236e-07	2.56545e-06	mt:ND1	mitochondrial NADH-ubiquinone oxidoreductase chain 1	Metabolism;Metabolism	Global and overview maps;Energy metabolism	ko01100//Metabolic pathways;ko00190//Oxidative phosphorylation	K03878;K03878	GO:0005743//mitochondrial inner membrane;GO:0005747//mitochondrial respiratory chain complex I;GO:0016020//membrane;GO:0016021//integral component of membrane	GO:0008137//NADH dehydrogenase (ubiquinone) activity	GO:0009060//aerobic respiration	--
MSTRG.11973	286	422	497	3787	2691	1180	27.893	41.368	52.648	338.215	242.467	117.291	40.6363	232.658	2.51737	2.52606e-07	2.56721e-06	GIP	RecName: Full=Copia protein; AltName: Full=Gag-int-pol protein; Contains: RecName: Full=Copia VLP protein; Contains: RecName: Full=Copia protease [Drosophila melanogaster]	-	-	-	-	-	-	-	--
FBgn0034759	23	14	10	91	83	63	1.133	0.781	0.592	3.324	2.759	1.522	0.835333	2.535	1.60156	2.81878e-07	2.84474e-06	CG13511	AEM72503.1 MIP32409p1, partial [Drosophila melanogaster]	Cellular Processes	Transport and catabolism	ko04142//Lysosome	K19363	GO:0005765//lysosomal membrane;GO:0010008//endosome membrane;GO:0016021//integral component of membrane	GO:0046872//metal ion binding	-	zf-LITAF-like
FBgn0036952	38	55	22	142	155	116	1.756	2.52	1.104	5.981	6.609	5.463	1.79333	6.01767	1.74656	2.82245e-07	2.84624e-06	CG6933	NP_001262097.1 uncharacterized protein Dmel_CG6933, isoform D [Drosophila melanogaster]	-	-	-	-	GO:0005576//extracellular region	GO:0008061//chitin binding	-	--
FBgn0032613	36	73	104	302	253	168	0.974	1.985	3.056	7.483	6.324	4.633	2.005	6.14667	1.6162	2.94049e-07	2.95386e-06	Nepl9	Neprilysin-like 9	-	-	-	-	GO:0005886//plasma membrane	GO:0004222//metalloendopeptidase activity;GO:0008237//metallopeptidase activity	GO:0006508//proteolysis	--
FBgn0002563	179	49	49	17	10	10	3.947	1.086	1.174	0.343	0.204	0.225	2.069	0.257333	-3.00722	2.99335e-07	3.00002e-06	Lsp1beta	Larval serum protein 1 beta	-	-	-	-	GO:0005576//extracellular region;GO:0005616//larval serum protein complex	GO:0045735//nutrient reservoir activity	-	--
FBgn0051740	72	33	3	0	0	0	6.825	3.144	0.309	0	0	0	3.426	0.001	-11.7423	3.00293e-07	3.00732e-06	CG31740	NP_724084.1 uncharacterized protein Dmel_CG31740 [Drosophila melanogaster]	-	-	-	-	-	-	-	--
FBgn0044047	31	55	67	256	175	117	0.933	1.664	2.191	7.192	4.868	3.839	1.596	5.29967	1.73144	3.12986e-07	3.12005e-06	Ilp6	Insulin-like peptide 6	Environmental Information Processing;Environmental Information Processing;Organismal Systems	Signal transduction;Signal transduction;Aging	ko04150//mTOR signaling pathway;ko04068//FoxO signaling pathway;ko04213//Longevity regulating pathway - multiple species	K05459;K05459;K05459	GO:0005576//extracellular region;GO:0005615//extracellular space	GO:0005158//insulin receptor binding	GO:0007166//cell surface receptor signaling pathway;GO:0008286//insulin receptor signaling pathway;GO:0009267//cellular response to starvation;GO:0040018//positive regulation of multicellular organism growth;GO:0042594//response to starvation;GO:0046854//phosphatidylinositol phosphate biosynthetic process	--
FBgn0034924	226	129	173	66	64	52	6.924	3.972	5.757	1.852	1.811	1.624	5.551	1.76233	-1.65526	3.21521e-07	3.19293e-06	CG17658	NP_611845.2 uncharacterized protein Dmel_CG17658 [Drosophila melanogaster]	-	-	-	-	-	-	-	--
MSTRG.11953	4	2	2	29	51	39	0.386	0.194	0.209	2.56	4.541	3.831	0.263	3.644	3.79239	3.27916e-07	3.25396e-06	Ste:CG33237	SteXh:CG42398 [Drosophila melanogaster]	Environmental Information Processing;Genetic Information Processing;Human Diseases;Cellular Processes;Human Diseases;Cellular Processes;Human Diseases;Human Diseases;Human Diseases;Environmental Information Processing	Signal transduction;Translation;Neurodegenerative disease;Transport and catabolism;Neurodegenerative disease;Cellular community - eukaryotes;Neurodegenerative disease;Infectious disease: viral;Cancer: overview;Signal transduction	ko04310//Wnt signaling pathway;ko03008//Ribosome biogenesis in eukaryotes;ko05022//Pathways of neurodegeneration - multiple diseases;ko04137//Mitophagy - animal;ko05010//Alzheimer disease;ko04520//Adherens junction;ko05020//Prion disease;ko05162//Measles;ko05235//PD-L1 expression and PD-1 checkpoint pathway in cancer;ko04064//NF-kappa B signaling pathway	K03115;K03115;K03115;K03115;K03115;K03115;K03115;K03115;K03115;K03115	GO:0043227//membrane-bounded organelle	GO:0005515//protein binding;GO:0019207//kinase regulator activity	GO:0001932//regulation of protein phosphorylation;GO:0007166//cell surface receptor signaling pathway;GO:0009967//positive regulation of signal transduction	--
FBgn0031111	651	622	592	100	315	260	44.706	43.33	44.449	6.062	20.034	17.875	44.1617	14.657	-1.5912	3.3471e-07	3.31885e-06	Obp19c	Odorant-binding protein 19c	-	-	-	-	GO:0005576//extracellular region	GO:0005549//odorant binding	GO:0007606//sensory perception of chemical stimulus;GO:0007608//sensory perception of smell	--
FBgn0039328	29	35	57	190	134	107	1.149	1.394	2.453	6.893	4.904	4.32	1.66533	5.37233	1.68974	3.50256e-07	3.46584e-06	CHKov2	CHK domain ov2	-	-	-	-	-	-	-	--
FBgn0038395	561	606	627	149	346	266	33.598	36.578	40.693	7.544	18.86	16.23	36.9563	14.2113	-1.37878	3.50332e-07	3.46584e-06	CG10407	NP_001303466.1 uncharacterized protein Dmel_CG10407, isoform C [Drosophila melanogaster]	-	-	-	-	GO:0005615//extracellular space	-	GO:0032504//multicellular organism reproduction	--
FBgn0020299	110	142	157	345	345	245	1.589	2.02	2.303	4.399	4.385	3.501	1.97067	4.095	1.05518	3.57716e-07	3.53355e-06	stumps	stumps	-	-	-	-	GO:0005829//cytosol	GO:0005068//transmembrane receptor protein tyrosine kinase adaptor activity;GO:0005102//signaling receptor binding;GO:0005104//fibroblast growth factor receptor binding	GO:0001710//mesodermal cell fate commitment;GO:0007424//open tracheal system development;GO:0007425//epithelial cell fate determination, open tracheal system;GO:0007426//tracheal outgrowth, open tracheal system;GO:0007427//epithelial cell migration, open tracheal system;GO:0007498//mesoderm development;GO:0008078//mesodermal cell migration;GO:0008543//fibroblast growth factor receptor signaling p…	--
FBgn0035210	544	545	408	255	255	276	37.202	37.461	30.305	15.969	16.111	19.237	34.9893	17.1057	-1.03244	3.89604e-07	3.82246e-06	msd5	mitotic spindle density 5	-	-	-	-	GO:0005737//cytoplasm;GO:0005819//spindle;GO:0005874//microtubule	-	GO:0007049//cell cycle;GO:0051301//cell division	--
FBgn0030085	29	41	25	117	98	113	1.92	2.7	1.763	7.031	5.936	7.563	2.12767	6.84333	1.68543	3.91239e-07	3.83561e-06	CG6999	ACY65515.2 FI11086p1 [Drosophila melanogaster]	-	-	-	-	GO:0005634//nucleus;GO:0005730//nucleolus	GO:0003676//nucleic acid binding;GO:0003723//RNA binding	GO:0000381//regulation of alternative mRNA splicing, via spliceosome;GO:0000447//endonucleolytic cleavage in ITS1 to separate SSU-rRNA from 5.8S rRNA and LSU-rRNA from tricistronic rRNA transcript (SSU-rRNA, 5.8S rRNA, LSU-rRNA);GO:0000472//endonucleolytic cleavage to generate mature 5'-end of SSU-rRNA from (SSU-rRNA, 5.8S rRNA, LSU-rRNA);GO:0000480//endonucleolytic cleavage in 5'-ETS of tricistr…	--
FBgn0034052	539	551	519	304	310	201	35.427	36.4	37.051	18.297	18.824	13.464	36.2927	16.8617	-1.10593	4.43618e-07	4.32312e-06	CG8299	NP_611066.1 uncharacterized protein Dmel_CG8299 [Drosophila melanogaster]	Environmental Information Processing;Organismal Systems;Organismal Systems;Human Diseases	Signaling molecules and interaction;Digestive system;Digestive system;Infectious disease: viral	ko04080//Neuroactive ligand-receptor interaction;ko04974//Protein digestion and absorption;ko04972//Pancreatic secretion;ko05164//Influenza A	K01312;K01312;K01312;K01312	-	GO:0004252//serine-type endopeptidase activity	GO:0006508//proteolysis	--
FBgn0034407	1183	1018	400	4701	4116	3933	151.353	130.908	55.584	550.753	486.5	512.832	112.615	516.695	2.19791	4.46829e-07	4.34791e-06	DptB	Diptericin B	Organismal Systems	Immune system	ko04624//Toll and Imd signaling pathway	K20669	GO:0005576//extracellular region;GO:0005615//extracellular space	-	GO:0006959//humoral immune response;GO:0009611//response to wounding;GO:0019731//antibacterial humoral response;GO:0042742//defense response to bacterium;GO:0045087//innate immune response;GO:0050830//defense response to Gram-positive bacterium	--
FBgn0000158	299	262	277	96	157	110	8.826	7.774	8.881	2.595	4.282	3.309	8.49367	3.39533	-1.32283	4.55388e-07	4.42789e-06	bam	bag of marbles	-	-	-	-	GO:0005737//cytoplasm;GO:0045169//fusome;GO:0045170//spectrosome	GO:0000900//translation repressor activity, mRNA regulatory element binding;GO:0003730//mRNA 3'-UTR binding;GO:0043130//ubiquitin binding	GO:0007049//cell cycle;GO:0007276//gamete generation;GO:0007282//cystoblast division;GO:0007283//spermatogenesis;GO:0007284//spermatogonial cell division;GO:0017148//negative regulation of translation;GO:0030718//germ-line stem cell population maintenance;GO:0030727//germarium-derived female germ-line cyst formation;GO:0035212//cell competition in a multicellular organism;GO:0042078//germ-line st…	--
FBgn0034569	644	587	504	234	319	341	20.45	18.735	17.383	6.804	9.359	11.036	18.856	9.06633	-1.05643	5.04892e-07	4.87651e-06	dgt3	dim gamma-tubulin 3	-	-	-	-	GO:0005737//cytoplasm;GO:0005819//spindle;GO:0005874//microtubule	-	GO:0007052//mitotic spindle organization;GO:0007088//regulation of mitotic nuclear division;GO:0051301//cell division	--
FBgn0053265	10	10	19	114	68	47	0.103	0.104	0.213	1.075	0.647	0.493	0.14	0.738333	2.39885	5.25811e-07	5.06356e-06	Muc68E	Mucin 68E	-	-	-	-	GO:0005576//extracellular region;GO:0031012//extracellular matrix	GO:0005201//extracellular matrix structural constituent;GO:0008061//chitin binding	-	--
FBgn0053556	118	68	108	293	260	199	1.115	0.646	1.108	2.535	2.27	1.917	0.956333	2.24067	1.22834	5.31369e-07	5.10577e-06	form3	formin 3	-	-	-	-	-	GO:0003779//actin binding	GO:0016043//cellular component organization;GO:0030036//actin cytoskeleton organization;GO:0035147//branch fusion, open tracheal system	--
FBgn0029768	65	81	60	212	187	145	1.201	1.424	1.263	3.405	3.387	2.958	1.296	3.25	1.32637	5.32656e-07	5.11436e-06	SPR	Sex peptide receptor	-	-	-	-	GO:0005886//plasma membrane;GO:0016021//integral component of membrane	GO:0004930//G protein-coupled receptor activity;GO:0008528//G protein-coupled peptide receptor activity	GO:0007186//G protein-coupled receptor signaling pathway;GO:0045434//negative regulation of female receptivity, post-mating;GO:0046662//regulation of oviposition	--
FBgn0037368	581	395	507	249	265	251	31.719	21.655	30.074	12.453	13.376	13.961	27.816	13.2633	-1.06847	5.34911e-07	5.13224e-06	CG1239	NP_001287185.1 uncharacterized protein Dmel_CG1239, isoform B [Drosophila melanogaster]	-	-	-	-	-	GO:0008168//methyltransferase activity;GO:0008171//O-methyltransferase activity;GO:0008173//RNA methyltransferase activity;GO:0017069//snRNA binding	GO:0032259//methylation;GO:0040031//snRNA modification	--
FBgn0010395	99	130	191	447	346	271	1.798	2.407	3.874	7.534	5.938	5.088	2.693	6.18667	1.19995	5.63547e-07	5.39111e-06	Itgbn	Integrin betanu subunit	Cellular Processes;Environmental Information Processing	Transport and catabolism;Signaling molecules and interaction	ko04145//Phagosome;ko04512//ECM-receptor interaction	K05719;K05719	GO:0005925//focal adhesion;GO:0008305//integrin complex;GO:0016021//integral component of membrane	GO:0005178//integrin binding;GO:0046982//protein heterodimerization activity	GO:0006909//phagocytosis;GO:0007155//cell adhesion;GO:0007157//heterophilic cell-cell adhesion via plasma membrane cell adhesion molecules;GO:0007160//cell-matrix adhesion;GO:0007229//integrin-mediated signaling pathway;GO:0016477//cell migration;GO:0033627//cell adhesion mediated by integrin;GO:0035011//melanotic encapsulation of foreign target;GO:0043277//apoptotic cell clearance;GO:0045886//ne…	--
FBgn0039476	2	3	2	42	38	29	0.107	0.162	0.117	2.068	1.884	1.59	0.128667	1.84733	3.84373	5.73307e-07	5.47244e-06	CG6271	NP_651526.1 uncharacterized protein Dmel_CG6271 [Drosophila melanogaster]	-	-	-	-	GO:0005615//extracellular space	GO:0004806//triglyceride lipase activity;GO:0008970//phospholipase A1 activity;GO:0016298//lipase activity	GO:0006629//lipid metabolic process;GO:0016042//lipid catabolic process	--
FBgn0003719	43	46	31	121	131	115	0.735	0.791	0.576	1.895	2.07	2.004	0.700667	1.98967	1.50573	5.78524e-07	5.5182e-06	tld	tolloid	-	-	-	-	GO:0005615//extracellular space	GO:0004222//metalloendopeptidase activity;GO:0005509//calcium ion binding;GO:0005518//collagen binding;GO:0008237//metallopeptidase activity;GO:0008270//zinc ion binding	GO:0006508//proteolysis;GO:0007313//maternal specification of dorsal/ventral axis, oocyte, soma encoded;GO:0007378//amnioserosa formation;GO:0008586//imaginal disc-derived wing vein morphogenesis;GO:0016485//protein processing;GO:0030513//positive regulation of BMP signaling pathway;GO:0032927//positive regulation of activin receptor signaling pathway;GO:0045464//R8 cell fate specification	--
FBgn0036008	454	345	449	231	204	207	13.815	10.551	14.843	6.436	5.734	6.42	13.0697	6.19667	-1.07666	6.00958e-07	5.72381e-06	CG3408	NP_648328.1 uncharacterized protein Dmel_CG3408, isoform A [Drosophila melanogaster]	-	-	-	-	GO:0016021//integral component of membrane	GO:0005515//protein binding	-	--
FBgn0004795	870	642	697	354	472	335	11.628	8.631	10.118	4.456	5.835	4.567	10.1257	4.95267	-1.03174	6.02717e-07	5.73637e-06	retn	retained	-	-	-	-	GO:0005634//nucleus	GO:0000976//transcription cis-regulatory region binding;GO:0000977//RNA polymerase II transcription regulatory region sequence-specific DNA binding;GO:0001228//DNA-binding transcription activator activity, RNA polymerase II-specific;GO:0003677//DNA binding	GO:0000122//negative regulation of transcription by RNA polymerase II;GO:0006357//regulation of transcription by RNA polymerase II;GO:0007411//axon guidance;GO:0007431//salivary gland development;GO:0007517//muscle organ development;GO:0008049//male courtship behavior;GO:0009880//embryonic pattern specification;GO:0009952//anterior/posterior pattern specification;GO:0042063//gliogenesis;GO:004589…	ARID
FBgn0040503	11	8	20	67	103	52	0.824	0.602	1.471	4.595	7.127	3.969	0.965667	5.23033	2.43731	6.11266e-07	5.81349e-06	CG7763	NP_001356891.1 uncharacterized protein Dmel_CG7763, isoform C [Drosophila melanogaster]	-	-	-	-	-	GO:0030246//carbohydrate binding	-	--
FBgn0030667	4	0	1	64	30	25	0.062	0	0.017	0.912	0.431	0.396	0.0263333	0.579667	4.46026	6.84876e-07	6.4664e-06	CG15599	NP_573052.4 uncharacterized protein Dmel_CG15599 [Drosophila melanogaster]	-	-	-	-	-	-	-	--
FBgn0039731	342	309	305	128	181	154	13.037	11.839	12.628	4.468	6.374	5.983	12.5013	5.60833	-1.15644	6.8745e-07	6.48601e-06	Sas-6	Spindle assembly abnormal 6	-	-	-	-	GO:0005737//cytoplasm;GO:0005813//centrosome;GO:0005814//centriole;GO:0036064//ciliary basal body	-	GO:0007098//centrosome cycle;GO:0007099//centriole replication;GO:0010457//centriole-centriole cohesion;GO:0032053//ciliary basal body organization;GO:0051298//centrosome duplication;GO:0098534//centriole assembly	--
FBgn0037149	425	370	328	184	199	197	22.891	19.823	19.122	9.046	9.761	10.617	20.612	9.808	-1.07145	7.09606e-07	6.68172e-06	CG14561	NP_001262201.1 uncharacterized protein Dmel_CG14561, isoform B [Drosophila melanogaster]	-	-	-	-	-	-	-	--
FBgn0039075	6	2	6	69	44	29	0.058	0.026	0.063	0.612	0.394	0.293	0.049	0.433	3.14351	7.12534e-07	6.70327e-06	CG4393	NP_001287483.1 uncharacterized protein Dmel_CG4393, isoform C [Drosophila melanogaster]	-	-	-	-	GO:0005829//cytosol	GO:0005515//protein binding	-	--
FBgn0039050	52	88	112	248	207	220	1.829	3.097	4.167	8.173	6.689	7.693	3.031	7.51833	1.31062	7.1698e-07	6.74024e-06	CG17110	NP_001262858.1 uncharacterized protein Dmel_CG17110, isoform B [Drosophila melanogaster]	Metabolism;Metabolism;Metabolism;Metabolism	Global and overview maps;Global and overview maps;Global and overview maps;Amino acid metabolism	ko01100//Metabolic pathways;ko01230//Biosynthesis of amino acids;ko01210//2-Oxocarboxylic acid metabolism;ko00220//Arginine biosynthesis	K14677;K14677;K14677;K14677	GO:0005737//cytoplasm	GO:0004046//aminoacylase activity;GO:0016787//hydrolase activity	GO:0006520//cellular amino acid metabolic process	--
FBgn0013278	1464	981	535	9639	5594	3986	35.828	24.123	14.219	216.03	126.485	99.427	24.7233	147.314	2.57495	7.31672e-07	6.86845e-06	Hsp70Bb	Heat-shock-protein-70Bb	Genetic Information Processing;Cellular Processes;Genetic Information Processing;Organismal Systems	Folding, sorting and degradation;Transport and catabolism;Transcription;Aging	ko04141//Protein processing in endoplasmic reticulum;ko04144//Endocytosis;ko03040//Spliceosome;ko04213//Longevity regulating pathway - multiple species	K03283;K03283;K03283;K03283	GO:0005634//nucleus;GO:0005737//cytoplasm;GO:0005829//cytosol;GO:0005886//plasma membrane	GO:0005524//ATP binding;GO:0016887//ATP hydrolysis activity;GO:0031072//heat shock protein binding;GO:0044183//protein folding chaperone;GO:0051082//unfolded protein binding;GO:0051787//misfolded protein binding;GO:0140662//ATP-dependent protein folding chaperone	GO:0001666//response to hypoxia;GO:0006986//response to unfolded protein;GO:0009408//response to heat;GO:0009636//response to toxic substance;GO:0016192//vesicle-mediated transport;GO:0034620//cellular response to unfolded protein;GO:0035080//heat shock-mediated polytene chromosome puffing;GO:0042026//protein refolding;GO:0051085//chaperone cofactor-dependent protein refolding	--
FBgn0051955	33	36	58	160	150	103	3.576	2.933	5.775	12.749	13.869	9.296	4.09467	11.9713	1.54777	7.47146e-07	6.97854e-06	CG31955	NP_001285597.1 uncharacterized protein Dmel_CG31955, isoform C [Drosophila melanogaster]	-	-	-	-	-	-	-	--
FBgn0263621	86	48	67	166	220	165	19.682	11.042	16.655	34.789	46.516	38.486	15.793	39.9303	1.3382	7.58714e-07	7.07138e-06	CG43630	NP_001247079.1 uncharacterized protein Dmel_CG43630 [Drosophila melanogaster]	-	-	-	-	GO:0016021//integral component of membrane	-	-	--
FBgn0085356	30	26	15	0	0	0	2.032	1.77	1.104	0	0	0	1.63533	0.001	-10.6754	7.83453e-07	7.28114e-06	CG34327	NP_001097010.1 uncharacterized protein Dmel_CG34327 [Drosophila melanogaster]	-	-	-	-	-	-	-	--
FBgn0036799	148	126	170	51	47	63	10.263	9.173	13.686	3.134	2.842	4.46	11.0407	3.47867	-1.66622	7.89447e-07	7.33162e-06	CG13380	NP_001034030.1 uncharacterized protein Dmel_CG13380, isoform B [Drosophila melanogaster]	-	-	-	-	-	-	-	--
FBgn0053093	11	5	2	71	37	51	0.599	0.274	0.118	3.54	1.861	2.83	0.330333	2.74367	3.05411	7.91003e-07	7.34084e-06	CG33093	NP_788715.2 uncharacterized protein Dmel_CG33093 [Drosophila melanogaster]	-	-	-	-	-	GO:0016491//oxidoreductase activity;GO:0046872//metal ion binding	-	--
FBgn0051849	223	147	172	76	73	57	5.825	3.86	4.88	1.818	1.762	1.518	4.855	1.69933	-1.5145	8.0616e-07	7.45498e-06	CG31849	NP_723787.1 uncharacterized protein Dmel_CG31849 [Drosophila melanogaster]	Metabolism;Metabolism	Global and overview maps;Glycan biosynthesis and metabolism	ko01100//Metabolic pathways;ko00510//N-Glycan biosynthesis	K00737;K00737	GO:0016020//membrane;GO:0016021//integral component of membrane	GO:0003830//beta-1,4-mannosylglycoprotein 4-beta-N-acetylglucosaminyltransferase activity;GO:0016757//glycosyltransferase activity	GO:0006044//N-acetylglucosamine metabolic process;GO:0006487//protein N-linked glycosylation	--
FBgn0264975	92	74	88	215	187	189	1.038	0.821	1.055	2.207	1.937	2.169	0.971333	2.10433	1.11532	8.32869e-07	7.6837e-06	Nrg	Neuroglian	-	-	-	-	GO:0005886//plasma membrane;GO:0005887//integral component of plasma membrane;GO:0005918//septate junction;GO:0005919//pleated septate junction;GO:0005923//bicellular tight junction;GO:0016021//integral component of membrane;GO:0030175//filopodium;GO:0030424//axon;GO:0030425//dendrite;GO:0043025//neuronal cell body	GO:0005509//calcium ion binding;GO:0005515//protein binding;GO:0050839//cell adhesion molecule binding	GO:0007158//neuron cell-cell adhesion;GO:0007409//axonogenesis;GO:0007560//imaginal disc morphogenesis;GO:0008045//motor neuron axon guidance;GO:0008049//male courtship behavior;GO:0008050//female courtship behavior;GO:0008366//axon ensheathment;GO:0016319//mushroom body development;GO:0019991//septate junction assembly;GO:0021682//nerve maturation;GO:0035011//melanotic encapsulation of foreign t…	--
FBgn0264989	79	84	140	316	266	204	10.457	11.109	20.127	38.301	32.588	27.587	13.8977	32.8253	1.23997	8.46723e-07	7.77792e-06	CG44140	NP_001260468.1 uncharacterized protein Dmel_CG44141 [Drosophila melanogaster]	-	-	-	-	-	-	-	--
FBgn0264990	79	84	140	316	266	204	10.457	11.109	20.127	38.301	32.588	27.587	13.8977	32.8253	1.23997	8.46723e-07	7.77792e-06	CG44141	NP_001260468.1 uncharacterized protein Dmel_CG44141 [Drosophila melanogaster]	-	-	-	-	-	-	-	--
FBgn0033884	765	640	628	349	440	357	23.375	20.025	21.208	9.33	11.892	11.03	21.536	10.7507	-1.00232	8.47047e-07	7.77792e-06	CG13344	NP_001027416.2 uncharacterized protein Dmel_CG13344, isoform C [Drosophila melanogaster]	-	-	-	-	GO:0005634//nucleus	GO:0004842//ubiquitin-protein transferase activity;GO:0005515//protein binding;GO:0008270//zinc ion binding;GO:0061630//ubiquitin protein ligase activity	GO:0016567//protein ubiquitination;GO:0051092//positive regulation of NF-kappaB transcription factor activity	--
FBgn0085424	55	65	54	158	138	156	0.792	1.209	0.892	2.355	2.028	2.541	0.964333	2.308	1.25904	8.56479e-07	7.85346e-06	nub	nubbin	Human Diseases;Human Diseases	Cardiovascular disease;Infectious disease: viral	ko05417//Lipid and atherosclerosis;ko05168//Herpes simplex virus 1 infection	K09364;K09364	GO:0005634//nucleus	GO:0000976//transcription cis-regulatory region binding;GO:0000981//DNA-binding transcription factor activity, RNA polymerase II-specific;GO:0001228//DNA-binding transcription activator activity, RNA polymerase II-specific;GO:0003677//DNA binding;GO:0003700//DNA-binding transcription factor activity	GO:0002809//negative regulation of antibacterial peptide biosynthetic process;GO:0006355//regulation of transcription, DNA-templated;GO:0006357//regulation of transcription by RNA polymerase II;GO:0030154//cell differentiation;GO:0035107//appendage morphogenesis;GO:0045944//positive regulation of transcription by RNA polymerase II;GO:0048813//dendrite morphogenesis;GO:0050767//regulation of neuro…	Pou
FBgn0036713	117	105	107	206	317	234	4.815	4.343	4.782	7.762	12.051	9.814	4.64667	9.87567	1.08768	8.68876e-07	7.96154e-06	Mip	Myoinhibiting peptide precursor	-	-	-	-	GO:0005615//extracellular space	GO:0001664//G protein-coupled receptor binding;GO:0005102//signaling receptor binding;GO:0005184//neuropeptide hormone activity	GO:0007186//G protein-coupled receptor signaling pathway;GO:0007218//neuropeptide signaling pathway;GO:0045968//negative regulation of juvenile hormone biosynthetic process;GO:1903999//negative regulation of eating behavior	--
FBgn0034289	362	257	400	1032	638	572	10.445	7.453	12.535	27.266	17.006	16.82	10.1443	20.364	1.00535	8.98108e-07	8.17767e-06	CG10910	NP_611280.2 uncharacterized protein Dmel_CG10910 [Drosophila melanogaster]	-	-	-	-	-	-	-	--
FBgn0011818	763	659	653	357	461	338	22.204	19.671	20.651	8.961	11.79	10.026	20.842	10.259	-1.0226	8.99318e-07	8.18298e-06	oaf	out at first	-	-	-	-	-	-	GO:0007275//multicellular organism development	--
FBgn0085353	1578	1511	2408	8011	6899	3909	87.583	84.292	145.163	407.154	353.753	221.118	105.679	327.342	1.6311	9.05389e-07	8.23248e-06	CG34324	NP_001096972.1 uncharacterized protein Dmel_CG34324 [Drosophila melanogaster]	-	-	-	-	GO:0005576//extracellular region	GO:0008061//chitin binding	-	--
FBgn0030748	97	108	119	316	227	209	2.769	3.084	3.505	7.841	5.844	5.897	3.11933	6.52733	1.06526	9.23621e-07	8.38656e-06	Traf-like	TNF-receptor-associated factor-like	-	-	-	-	GO:0005737//cytoplasm;GO:0009898//cytoplasmic side of plasma membrane	GO:0004842//ubiquitin-protein transferase activity;GO:0005164//tumor necrosis factor receptor binding;GO:0005515//protein binding;GO:0031625//ubiquitin protein ligase binding	GO:0033209//tumor necrosis factor-mediated signaling pathway;GO:0043122//regulation of I-kappaB kinase/NF-kappaB signaling;GO:0046330//positive regulation of JNK cascade;GO:0070534//protein K63-linked ubiquitination;GO:1904504//positive regulation of lipophagy	--
FBgn0264295	12	3	10	80	64	37	2.337	0.587	2.115	14.265	11.514	7.343	1.67967	11.0407	2.71658	9.69178e-07	8.7636e-06	CG43773	ABX00740.2 IP21903p, partial [Drosophila melanogaster]	-	-	-	-	-	-	-	--
FBgn0029639	11	25	9	59	100	76	0.867	1.98	0.77	4.257	7.28	6.104	1.20567	5.88033	2.28607	9.88919e-07	8.92354e-06	CG14419	-	-	-	-	-	-	-	-	--
FBgn0038390	586	451	472	221	312	244	12.5	9.67	10.936	4.317	6.149	5.305	11.0353	5.257	-1.06982	1.00894e-06	9.06655e-06	Rbf2	Retinoblastoma-family protein 2	Environmental Information Processing	Signal transduction	ko04350//TGF-beta signaling pathway	K04681	GO:0000785//chromatin;GO:0005634//nucleus;GO:0005667//transcription regulator complex;GO:0031523//Myb complex;GO:0035189//Rb-E2F complex	GO:0000976//transcription cis-regulatory region binding;GO:0000977//RNA polymerase II transcription regulatory region sequence-specific DNA binding;GO:0008134//transcription factor binding	GO:0000122//negative regulation of transcription by RNA polymerase II;GO:0006357//regulation of transcription by RNA polymerase II;GO:0007049//cell cycle;GO:0007346//regulation of mitotic cell cycle;GO:0030154//cell differentiation;GO:0051726//regulation of cell cycle;GO:2000134//negative regulation of G1/S transition of mitotic cell cycle	--
FBgn0026778	390	359	294	148	196	168	15.097	13.968	12.382	5.264	6.991	6.608	13.8157	6.28767	-1.13571	1.01191e-06	9.08076e-06	Rad1	Radiation insensitive 1	Cellular Processes	Cell growth and death	ko04218//Cellular senescence	K02830	GO:0005634//nucleus;GO:0030896//checkpoint clamp complex;GO:0042025//host cell nucleus	GO:0008408//3'-5' exonuclease activity	GO:0000077//DNA damage checkpoint signaling;GO:0006281//DNA repair	--
FBgn0085343	390	359	294	148	196	168	15.097	13.968	12.382	5.264	6.991	6.608	13.8157	6.28767	-1.13571	1.01191e-06	9.08076e-06	Sws1	SWIM domain containing Srs2 interacting protein 1	-	-	-	-	-	-	-	--
FBgn0029167	480	551	911	3168	2491	1654	2.345	2.706	4.835	14.176	11.245	8.237	3.29533	11.2193	1.76749	1.17067e-06	1.0384e-05	Hml	Hemolectin	Environmental Information Processing	Signaling molecules and interaction	ko04512//ECM-receptor interaction	K03900	GO:0005576//extracellular region	GO:0005515//protein binding;GO:0008061//chitin binding;GO:0042803//protein homodimerization activity	GO:0007599//hemostasis;GO:0042060//wound healing;GO:0042381//hemolymph coagulation	--
FBgn0053213	311	368	371	133	184	195	13.968	16.613	18.098	5.47	7.635	8.926	16.2263	7.34367	-1.14376	1.18081e-06	1.04597e-05	CG33213	NP_788749.1 uncharacterized protein Dmel_CG33213 [Drosophila melanogaster]	-	-	-	-	GO:0005634//nucleus	GO:0000978//RNA polymerase II cis-regulatory region sequence-specific DNA binding;GO:0000981//DNA-binding transcription factor activity, RNA polymerase II-specific	GO:0006357//regulation of transcription by RNA polymerase II	--
FBgn0030981	30	19	7	74	101	95	2.19	1.394	0.555	4.946	6.811	7.067	1.37967	6.27467	2.18522	1.27723e-06	1.11996e-05	CG14191	AFH01424.1 FI20204p1, partial [Drosophila melanogaster]	-	-	-	-	-	-	-	--
FBgn0264894	165	128	157	412	383	234	2.629	2.039	2.749	5.831	5.521	3.739	2.47233	5.03033	1.02478	1.28393e-06	1.12458e-05	CG44085	NP_001260440.1 uncharacterized protein Dmel_CG44085, isoform O [Drosophila melanogaster]	-	-	-	-	-	GO:0005078//MAP-kinase scaffold activity	-	--
FBgn0004360	73	55	24	173	172	152	1.873	1.418	0.669	4.065	4.077	3.973	1.32	4.03833	1.61322	1.28993e-06	1.12806e-05	Wnt2	Wnt oncogene analog 2	Environmental Information Processing;Environmental Information Processing;Human Diseases;Human Diseases;Human Diseases;Human Diseases;Human Diseases;Human Diseases;Human Diseases;Cellular Processes;Environmental Information Processing;Organismal Systems;Human Diseases;Human Diseases;Human Diseases	Signal transduction;Signal transduction;Neurodegenerative disease;Neurodegenerative disease;Cancer: overview;Endocrine and metabolic disease;Cancer: overview;Infectious disease: viral;Cancer: specific types;Cellular community - eukaryotes;Signal transduction;Endocrine system;Cancer: specific types;Cancer: specific types;Cancer: specific types	ko04310//Wnt signaling pathway;ko04150//mTOR signaling pathway;ko05022//Pathways of neurodegeneration - multiple diseases;ko05010//Alzheimer disease;ko05200//Pathways in cancer;ko04934//Cushing syndrome;ko05205//Proteoglycans in cancer;ko05165//Human papillomavirus infection;ko05225//Hepatocellular carcinoma;ko04550//Signaling pathways regulating pluripotency of stem cells;ko04390//Hippo signalin…	K00572;K00572;K00572;K00572;K00572;K00572;K00572;K00572;K00572;K00572;K00572;K00572;K00572;K00572;K00572	GO:0005576//extracellular region;GO:0005615//extracellular space	GO:0005102//signaling receptor binding;GO:0005109//frizzled binding;GO:0005125//cytokine activity	GO:0007275//multicellular organism development;GO:0007367//segment polarity determination;GO:0007424//open tracheal system development;GO:0007517//muscle organ development;GO:0016055//Wnt signaling pathway;GO:0030182//neuron differentiation;GO:0045165//cell fate commitment;GO:0046330//positive regulation of JNK cascade;GO:0048675//axon extension;GO:0060070//canonical Wnt signaling pathway;GO:0060…	--
FBgn0034644	197	139	161	394	380	278	2.828	2.006	2.54	5.541	5.073	4.182	2.458	4.932	1.00469	1.31052e-06	1.14454e-05	CG10082	NP_726095.2 uncharacterized protein Dmel_CG10082, isoform A [Drosophila melanogaster]	Environmental Information Processing	Signal transduction	ko04070//Phosphatidylinositol signaling system	K07756	GO:0005634//nucleus;GO:0005737//cytoplasm	GO:0000828//inositol hexakisphosphate kinase activity;GO:0016301//kinase activity	GO:0032958//inositol phosphate biosynthetic process;GO:0046854//phosphatidylinositol phosphate biosynthetic process	--
FBgn0033875	206	145	254	597	438	349	8.212	5.81	10.998	21.793	16.131	14.179	8.34	17.3677	1.05828	1.3425e-06	1.16855e-05	CG6357	NP_610907.1 uncharacterized protein Dmel_CG6357 [Drosophila melanogaster]	-	-	-	-	-	GO:0016787//hydrolase activity	GO:0006508//proteolysis	--
FBgn0050148	126	109	150	284	229	341	11.712	10.184	15.144	24.174	19.665	32.305	12.3467	25.3813	1.03965	1.35189e-06	1.17515e-05	CG30148	NP_001286634.1 uncharacterized protein Dmel_CG30148, isoform B [Drosophila melanogaster]	-	-	-	-	-	GO:0030246//carbohydrate binding	-	--
[truncated: 621 more rows]

## Sheet: CK-D50-vs-RPPEs-D50
id	CK-D50-1_count	CK-D50-2_count	CK-D50-3_count	RPPEs-D50-1_count	RPPEs-D50-2_count	RPPEs-D50-3_count	CK-D50-1_tpm	CK-D50-2_tpm	CK-D50-3_tpm	RPPEs-D50-1_tpm	RPPEs-D50-2_tpm	RPPEs-D50-3_tpm	CK-D50_mean	RPPEs-D50_mean	log2(fc)	PValue	FDR	Symbol	Description	KEGG_A_class	KEGG_B_class	Pathway	K_ID	GO Component	GO Function	GO Process	TF_family
[truncated: 971 more rows]

[truncated: 10 more sheets: UPLC-Q-Orbitrap-MS2 of RPPEs, TPC, Antioxidant enzyme,  intestinal barrier, healthspan, lifespan experiment, safety assessment, stress experiment, sleep experiment, qRT-PCR]
